# Supplementary material for: Theoretical–Computational Modeling of CD Spectra of Aqueous Monosaccharides by Means of Molecular Dynamics Simulations and Perturbed Matrix Method
Source: MDPI journal article supplement (doi:10.3390/molecules28083591), 2023-04-20

## Supplementary Information

for

Theoretical-computational modelling of CD  
spectra of aqueous monosaccharides by means of  
Molecular Dynamics simulations and Perturbed  
Matrix Method

Massimiliano Aschi, Laura Palombi, Andrea Amadei

### Outline.

- S1. Cartesian coordinates, energies and transition moments for PMM-calculations
- S2. Composition of the essential eigenvectors of the covariance matrix
- S3. Location of the Representative Conformations on the Essential plane
- S4. Spectra of the GG and GT rotamers for Alpha and Beta D-glucose
- S5. Eigenvalues of the D-Galactose covariance matrix

### S1. Geometries, energies and transition moments for PMM-calculations

The geometries are reported in Angstrom (the first column refers to the atomic number)

The expectation values of the electric dipoles (i,i) are reported in Debye

The transition electric dipoles (i,j) are reported in atomic units

The transition magnetic dipoles (i,j) are reported in atomic units

Ground energy is reported in atomic units

Vertical Excitation energies are reported in eV

### D-glucose

Structure A-alpha

Number of atoms : 24

|   |          |          |           |
|---|----------|----------|-----------|
| 1 | -3.80346 | -0.68433 | 0.79396   |
| 8 | -3.50506 | -0.69963 | -0.12594  |
| 6 | -2.59574 | 0.36188  | -0.34719  |
| 1 | -2.564   | 0.50143  | -1.43175  |
| 1 | -2.93506 | 1.29625  | 0.11314   |
| 6 | -1.19016 | 0.05228  | 0.1451    |
| 1 | -1.20951 | -0.11967 | 1.23134   |
| 6 | -0.21995 | 1.19278  | -0.14365  |
| 1 | -0.27262 | 1.42733  | -1.22137  |
| 8 | -0.633   | 2.3102   | 0.61987   |
| 1 | 0.02668  | 3.01195  | 0.5041    |
| 6 | 1.21199  | 0.79848  | 0.20164   |
| 1 | 1.2836   | 0.64004  | 1.28185   |
| 8 | 2.10196  | 1.87169  | -0.07037  |
| 1 | 2.09256  | 2.06748  | -1.02048  |
| 6 | 1.58616  | -0.48143 | -0.54171  |
| 1 | 1.57241  | -0.29145 | -1.62167  |
| 8 | 2.88469  | -0.94457 | -0.25672  |
| 1 | 3.01402  | -0.94757 | 0.70389   |
| 6 | 0.54548  | -1.5705  | -0.256291 |

|   |          |          |          |
|---|----------|----------|----------|
| 8 | -0.75864 | -1.12553 | -0.53622 |
| 1 | 0.6976   | -2.43087 | -0.9136  |
| 8 | 0.69072  | -1.95525 | 1.09587  |
| 1 | -0.17422 | -2.24687 | 1.42133  |

# Electric dipoles

|    |    |                 |                 |                 |              |        |
|----|----|-----------------|-----------------|-----------------|--------------|--------|
| 0  | 0  | -0.937200010    | 1.54579997      | 0.578000009     |              |        |
| 0  | 1  | 5.92000000E-02  | -0.103000000    | 0.118000001     |              |        |
| 0  | 2  | 0.153300002     | -3.88000011E-02 | 0.125699997     |              |        |
| 0  | 3  | 0.129600003     | -0.116099998    | 1.72000006E-02  |              |        |
| 0  | 4  | 1.09999999E-02  | 7.93000013E-02  | 0.147300005     |              |        |
| 0  | 5  | -3.46000008E-02 | 0.146300003     | -0.195700005    |              |        |
| 0  | 6  | 0.224399999     | -8.11000019E-02 | -5.93000017E-02 |              |        |
| 0  | 7  | -0.103699997    | 0.184000000     | 0.330199987     |              |        |
| 0  | 8  | -0.111100003    | -0.195800006    | 2.58000009E-02  |              |        |
| 0  | 9  | -0.102799997    | -0.246299997    | -4.47999984E-02 |              |        |
| 0  | 10 | 9.99999978E-03  | 0.224800006     | -7.50999972E-02 |              |        |
| 0  | 11 | 0.0841          | -0.1190         | -0.0458         | 0.0233       | 0.0046 |
| 0  | 12 | -0.0628         | 0.1214          | 0.0803          | 0.0251       | 0.0050 |
| 0  | 13 | 0.0633          | 0.1510          | -0.3376         | 0.1408       | 0.0282 |
| 0  | 14 | 0.0412          | -0.0736         | 0.1123          | 0.0197       | 0.0040 |
| 0  | 15 | -0.1458         | -0.0670         | -0.1461         | 0.0471       | 0.0096 |
| 0  | 16 | -0.0026         | 0.1412          | -0.0400         | 0.0216       | 0.0044 |
|    | 1  | 1               | -1.68400002     | -2.85770011     | 3.44510007   |        |
|    | 2  | 2               | 1.65849996      | 1.52479994      | -2.67980003  |        |
|    | 3  | 3               | 0.548799992     | 4.08729982      | -4.53459978  |        |
|    | 4  | 4               | -2.37109995     | -4.42729998     | 5.74720001   |        |
|    | 5  | 5               | -0.382600009    | 2.21860003      | -0.981199980 |        |
|    | 6  | 6               | -2.12400007     | -2.45860004     | 3.56110001   |        |
|    | 7  | 7               | -1.10769999     | 0.981500030     | 0.250299990  |        |
|    | 8  | 8               | 2.17050004      | 4.28299999      | -3.70919991  |        |
|    | 9  | 9               | -1.53219998     | 1.41020000      | 0.200499997  |        |
|    | 10 | 10              | -2.09340000     | -1.34010005     | 2.01440001   |        |
| 11 | 11 | 1.8278          | 5.4269          | -0.1257         |              |        |
| 12 | 12 | -0.9134         | -0.4147         | -1.1480         |              |        |
| 13 | 13 | -1.5668         | -0.4194         | 3.6157          |              |        |
| 14 | 14 | -1.3355         | 0.0461          | 1.4263          |              |        |
| 15 | 15 | 0.3037          | 0.2385          | -0.2648         |              |        |
| 16 | 16 | -2.0189         | 0.8425          | 0.7661          |              |        |

# Magnetic moments

|    |                 |                 |                |
|----|-----------------|-----------------|----------------|
| 1  | 0.335900009     | -4.50999998E-02 | 1.89999994E-02 |
| 2  | -0.283800006    | -0.437299997    | -0.587800026   |
| 3  | -9.71999988E-02 | -0.107699998    | -0.524999976   |
| 4  | 0.121100001     | -0.294400007    | -0.214599997   |
| 5  | 0.133900002     | 6.80999979E-02  | -0.144199997   |
| 6  | -0.314399987    | 4.54999991E-02  | 0.674799979    |
| 7  | -0.484200001    | 7.37000033E-02  | -0.619000018   |
| 8  | -0.856899977    | -2.03000009E-02 | 0.396400005    |
| 9  | -0.135499999    | -0.373100013    | 7.25999996E-02 |
| 10 | -0.137300000    | 8.85000005E-02  | 6.97000027E-02 |
| 11 | -0.0488         | -0.1443         | 0.2430         |
| 12 | 0.3288          | -0.3707         | 0.4956         |
| 13 | 0.2104          | 0.0329          | -0.3305        |

|    |         |         |         |
|----|---------|---------|---------|
| 14 | -0.2191 | -0.0972 | -0.1637 |
| 15 | -0.0186 | 0.3791  | -0.0576 |
| 16 | 0.2563  | -0.2248 | 0.4416  |

Ground energy  
-686.914978

Vertical Excitation energies

6.69320011  
6.76429987  
6.96530008  
7.15619993  
7.31160021  
7.43769979  
7.63290024  
7.65189981  
7.70480013  
7.92070007  
8.0128  
8.1414  
8.1726  
8.2402  
8.2766  
8.3475

Structure B-alpha

Number of atoms 24

|   |          |          |          |
|---|----------|----------|----------|
| 1 | -4.01394 | -1.04232 | -0.49575 |
| 8 | -3.47016 | -0.63667 | 0.18965  |
| 6 | -2.59778 | 0.32913  | -0.38461 |
| 1 | -2.62737 | 0.29248  | -1.4799  |
| 1 | -2.89391 | 1.33049  | -0.05808 |
| 6 | -1.18207 | 0.05892  | 0.07828  |
| 1 | -1.21146 | -0.12809 | 1.16158  |
| 6 | -0.22239 | 1.22336  | -0.19933 |
| 1 | -0.24232 | 1.46954  | -1.26758 |
| 8 | -0.64181 | 2.40231  | 0.45793  |
| 1 | -0.52633 | 2.30186  | 1.41517  |
| 6 | 1.20074  | 0.81342  | 0.19986  |
| 1 | 1.2058   | 0.62069  | 1.28181  |
| 8 | 2.13857  | 1.84799  | -0.00174 |
| 1 | 2.5463   | 1.76127  | -0.87572 |
| 6 | 1.58698  | -0.4755  | -0.52805 |
| 1 | 1.58874  | -0.28868 | -1.60898 |
| 8 | 2.88874  | -0.92037 | -0.224   |
| 1 | 2.99357  | -0.94877 | 0.73958  |
| 6 | 0.54768  | -1.56668 | -0.26484 |
| 8 | -0.74192 | -1.12225 | -0.59846 |
| 1 | 0.73014  | -2.43393 | -0.90649 |
| 8 | 0.65072  | -1.92172 | 1.09485  |
| 1 | -0.14128 | -2.42468 | 1.34067  |

Electric dipoles

|   |   |              |             |                |
|---|---|--------------|-------------|----------------|
| 0 | 0 | -1.50790000  | -1.48640001 | -0.849600017   |
| 0 | 1 | -0.215599999 | 0.125799999 | 2.21999995E-02 |

|    |    |                 |                 |                 |
|----|----|-----------------|-----------------|-----------------|
| 0  | 2  | -8.79999995E-02 | -3.99000011E-02 | 1.84000004E-02  |
| 0  | 3  | 0.110699996     | -6.47000000E-02 | 0.146100000     |
| 0  | 4  | -5.79000004E-02 | 1.83000006E-02  | -2.50000004E-02 |
| 0  | 5  | -1.09999999E-02 | 4.56000008E-02  | 0.289000005     |
| 0  | 6  | 1.42000001E-02  | -0.254599988    | 6.40000030E-02  |
| 0  | 7  | -0.120499998    | -0.111400001    | 7.29999989E-02  |
| 0  | 8  | 5.55999987E-02  | -7.28999972E-02 | -0.100199997    |
| 0  | 9  | 4.08999994E-02  | 0.235100001     | 0.205300003     |
| 0  | 10 | 4.63000014E-02  | -8.30999985E-02 | 3.59000005E-02  |
| 0  | 11 | -0.0317         | -0.2965         | 0.1478          |
| 0  | 12 | 0.0399          | 0.0848          | -0.0488         |
| 0  | 13 | -0.0250         | -0.0758         | 0.1062          |
| 0  | 14 | -0.0847         | 0.0783          | 0.2332          |
| 0  | 15 | 0.3103          | -0.0501         | -0.0431         |
| 0  | 16 | -0.1453         | 0.3641          | -0.1056         |
|    | 1  | 1               | 4.07969999      | 0.908599973     |
|    | 2  | 2               | -1.65489995     | -3.31060004     |
|    | 3  | 3               | -5.65630007     | -2.62249994     |
|    | 4  | 4               | -2.75270009     | 1.47090006      |
|    | 5  | 5               | -1.28810000     | -2.44090009     |
|    | 6  | 6               | -1.54200006     | -2.96000000E-02 |
|    | 7  | 7               | -2.02710009     | -1.75820005     |
|    | 8  | 8               | 7.01000020E-02  | 3.89619994      |
|    | 9  | 9               | -1.44360006     | -3.72539997     |
|    | 10 | 10              | -2.11089993     | 1.24839997      |
| 11 | 11 | -1.8993         | 0.6614          | 0.5506          |
| 12 | 12 | 5.6871          | -0.2600         | 1.3221          |
| 13 | 13 | -2.6187         | -0.9086         | -0.8635         |
| 14 | 14 | -0.7052         | -0.7120         | 0.5859          |
| 15 | 15 | -2.2486         | -0.7730         | -3.1810         |
| 16 | 16 | -1.4871         | -2.5930         | 1.2248          |

Magnetic moments

|    |                 |                 |                 |
|----|-----------------|-----------------|-----------------|
| 1  | 0.183300003     | -4.60000010E-03 | 0.654999971     |
| 2  | -3.84000018E-02 | 0.328700006     | -0.160500005    |
| 3  | -1.00999996E-02 | 0.407499999     | 0.185900003     |
| 4  | -0.132699996    | 0.184499994     | 0.734899998     |
| 5  | 0.189600006     | -0.259700000    | 2.49999994E-03  |
| 6  | -0.278499991    | 0.139599994     | 7.78999999E-02  |
| 7  | -0.215900004    | 9.89999995E-03  | -0.899900019    |
| 8  | 0.668299973     | -4.47999984E-02 | 3.84999998E-02  |
| 9  | -0.257299989    | -8.00000038E-03 | 2.03000009E-02  |
| 10 | -0.411900014    | -7.00000003E-02 | -1.83000006E-02 |
| 11 | -0.4018         | -0.3612         | 0.3345          |
| 12 | -0.0916         | -0.1752         | 0.0980          |
| 13 | 0.0896          | 0.0061          | 0.0937          |
| 14 | 0.0070          | 0.2742          | -0.2740         |
| 15 | -0.0861         | -0.2237         | 0.5213          |
| 16 | 0.0806          | 0.0800          | 0.2118          |

Ground energy

-686.913208

Excitation energies

6.72840023

6.83020020  
 7.02829981  
 7.06829977  
 7.28310013  
 7.38749981  
 7.52530003  
 7.68779993  
 7.78020000  
 7.87589979  
 7.8858  
 7.9871  
 8.1295  
 8.1473  
 8.2316  
 8.3065

# Structure C-alpha

Number of atom: 24

|   |          |          |          |
|---|----------|----------|----------|
| 1 | -3.14896 | -1.35098 | -0.75953 |
| 8 | -3.45166 | -0.6781  | -0.13282 |
| 6 | -2.60073 | 0.44226  | -0.26129 |
| 1 | -2.56953 | 0.79173  | -1.30296 |
| 1 | -3.02209 | 1.23979  | 0.35245  |
| 6 | -1.18664 | 0.12432  | 0.20357  |
| 1 | -1.19307 | -0.09463 | 1.27985  |
| 6 | -0.18803 | 1.23037  | -0.11646 |
| 1 | -0.27906 | 1.50135  | -1.17279 |
| 8 | -0.49571 | 2.42547  | 0.5959   |
| 1 | -0.32798 | 2.28375  | 1.54105  |
| 6 | 1.25591  | 0.80529  | 0.14341  |
| 1 | 1.42317  | 0.69184  | 1.22546  |
| 8 | 2.14702  | 1.75617  | -0.40423 |
| 1 | 2.05481  | 2.58668  | 0.08468  |
| 6 | 1.55771  | -0.5298  | -0.51955 |
| 1 | 1.55385  | -0.37069 | -1.60779 |
| 8 | 2.8334   | -0.94893 | -0.08582 |
| 1 | 2.96419  | -1.88495 | -0.29434 |
| 6 | 0.47033  | -1.56459 | -0.21165 |
| 8 | -0.80735 | -1.05866 | -0.51846 |
| 1 | 0.57682  | -2.43759 | -0.86869 |
| 8 | 0.5701   | -1.94585 | 1.13506  |
| 1 | -0.24992 | -2.40417 | 1.37741  |

# Electric dipoles

|   |   |                 |                |                 |
|---|---|-----------------|----------------|-----------------|
| 0 | 0 | -0.589399993    | -1.64110005    | 0.337700009     |
| 0 | 1 | -1.54999997E-02 | 8.51000026E-02 | 7.40000000E-03  |
| 0 | 2 | -0.100000001    | 3.75000015E-02 | -1.85000002E-02 |
| 0 | 3 | -0.217999995    | 8.34000036E-02 | -0.105200000    |
| 0 | 4 | 7.06999972E-02  | -0.176899999   | 0.141399994     |
| 0 | 5 | 0.241500005     | 4.47999984E-02 | -0.143199995    |
| 0 | 6 | 6.94999993E-02  | 0.155200005    | 0.180099994     |
| 0 | 7 | 9.74000022E-02  | 0.216299996    | -0.202999994    |
| 0 | 8 | -1.66999996E-02 | 7.24999979E-02 | 0.396699995     |

|    |    |                 |              |                 |              |        |
|----|----|-----------------|--------------|-----------------|--------------|--------|
| 0  | 9  | 7.49999983E-03  | 0.130500004  | 0.154200003     |              |        |
| 0  | 10 | -8.89999978E-03 | -0.173999995 | -1.24000004E-02 |              |        |
| 0  | 11 | 0.0503          | -0.1141      | -0.1633         | 0.0422       | 0.0082 |
| 0  | 12 | 0.0216          | 0.0561       | -0.0618         | 0.0074       | 0.0015 |
| 0  | 13 | -0.0286         | 0.1315       | 0.0483          | 0.0204       | 0.0041 |
| 0  | 14 | 0.1495          | -0.1135      | -0.2699         | 0.1081       | 0.0215 |
| 0  | 15 | -0.1825         | 0.0940       | 0.0196          | 0.0425       | 0.0086 |
| 0  | 16 | -0.0221         | -0.2781      | 0.2207          | 0.1265       | 0.0256 |
|    | 1  | 1               | -1.36960006  | -5.54379988     | -4.78889990  |        |
|    | 2  | 2               | -2.90420008  | 4.73280001      | 2.68700004   |        |
|    | 3  | 3               | 0.801500022  | 2.68659997      | 2.08629990   |        |
|    | 4  | 4               | 2.21530008   | 3.16149998      | -1.75870001  |        |
|    | 5  | 5               | -1.04939997  | -3.90050006     | -2.15969992  |        |
|    | 6  | 6               | 1.88720000   | -3.07000000E-02 | 1.29400003   |        |
|    | 7  | 7               | -0.657000005 | -1.40840006     | -0.983699977 |        |
|    | 8  | 8               | -1.27139997  | 3.10000009E-03  | -3.63369989  |        |
|    | 9  | 9               | -1.94430006  | 1.69309998      | 0.669900000  |        |
|    | 10 | 10              | -0.210099995 | -0.219099998    | 0.274399996  |        |
| 11 | 11 | -1.8222         | 0.3580       | 0.9934          |              |        |
| 12 | 12 | -0.9045         | -3.0999      | -3.5985         |              |        |
| 13 | 13 | 0.7624          | -2.0270      | -1.3049         |              |        |
| 14 | 14 | -2.0858         | -1.8855      | 0.5922          |              |        |
| 15 | 15 | 5.3702          | 1.9463       | -0.2296         |              |        |
| 16 | 16 | 0.1317          | 1.6093       | 0.9862          |              |        |

#### Magnetic moments

|    |                 |                 |                 |
|----|-----------------|-----------------|-----------------|
| 1  | 0.106600001     | -0.370000005    | 0.128600001     |
| 2  | 0.310600013     | 0.416999996     | 0.410699993     |
| 3  | -0.330599993    | 0.445499986     | 0.355599999     |
| 4  | -3.04000005E-02 | 0.150500000     | 5.27999997E-02  |
| 5  | -0.172199994    | -2.19999999E-02 | 0.657700002     |
| 6  | 0.471899986     | -0.141700000    | 0.324200004     |
| 7  | 0.180000007     | 3.57999988E-02  | 0.180000007     |
| 8  | -0.448900014    | -0.160300002    | -3.95999998E-02 |
| 9  | -1.72000006E-02 | 0.445499986     | 0.225099996     |
| 10 | -6.94999993E-02 | 0.290100008     | 7.55999982E-02  |
| 11 | -0.3414         | -0.5560         | 0.2965          |
| 12 | 0.5719          | -0.1556         | -0.2448         |
| 13 | -0.3802         | 0.4980          | 0.1997          |
| 14 | -0.0917         | 0.1238          | 0.0885          |
| 15 | 0.2921          | 0.3815          | -0.0576         |
| 16 | 0.0072          | -0.0622         | 0.0276          |

#### Ground energy

-686.914062

#### Excitation energies

6.62169981  
6.81050014  
7.03739977  
7.20149994  
7.25939989  
7.54680014  
7.61579990  
7.70030022

7.85920000  
 7.88560009  
 7.9077  
 8.0372  
 8.0996  
 8.1300  
 8.2291  
 8.2686

# Structure D-alpha

Number of atomd: 24

|   |          |          |          |
|---|----------|----------|----------|
| 1 | -4.3575  | -0.44373 | -0.24175 |
| 8 | -3.45034 | -0.69071 | -0.01838 |
| 6 | -2.57973 | 0.37225  | -0.36829 |
| 1 | -2.54622 | 0.50205  | -1.45978 |
| 1 | -2.89023 | 1.31645  | 0.09446  |
| 6 | -1.19071 | 0.03674  | 0.12719  |
| 1 | -1.23305 | -0.1784  | 1.20133  |
| 6 | -0.21397 | 1.19316  | -0.12763 |
| 1 | -0.26717 | 1.45769  | -1.19389 |
| 8 | -0.62197 | 2.34707  | 0.60522  |
| 1 | 0.0395   | 2.57285  | 1.27504  |
| 6 | 1.21103  | 0.78046  | 0.19686  |
| 1 | 1.31205  | 0.60871  | 1.27694  |
| 8 | 2.17005  | 1.76831  | -0.18711 |
| 1 | 1.72708  | 2.58653  | -0.45437 |
| 6 | 1.55839  | -0.51093 | -0.53119 |
| 1 | 1.48694  | -0.32529 | -1.61228 |
| 8 | 2.84613  | -0.97126 | -0.19762 |
| 1 | 3.47485  | -0.26412 | -0.41002 |
| 6 | 0.52546  | -1.58204 | -0.19571 |
| 8 | -0.74985 | -1.12134 | -0.578   |
| 1 | 0.70288  | -2.47719 | -0.79744 |
| 8 | 0.5943   | -1.86895 | 1.174    |
| 1 | 0.38142  | -2.79837 | 1.32951  |

# Electric dipoles

|   |    |                 |                 |                 |        |        |
|---|----|-----------------|-----------------|-----------------|--------|--------|
| 0 | 0  | -0.865000010    | 1.73490000      | -0.853299975    |        |        |
| 0 | 1  | 3.89999989E-03  | 3.68999988E-02  | 0.118000001     |        |        |
| 0 | 2  | 6.12000003E-02  | -9.00000036E-02 | 0.135800004     |        |        |
| 0 | 3  | -5.44999987E-02 | -2.00999994E-02 | 0.118600003     |        |        |
| 0 | 4  | 5.00000007E-02  | 0.161899999     | 0.121399999     |        |        |
| 0 | 5  | 7.82999992E-02  | -0.117299996    | 3.64000015E-02  |        |        |
| 0 | 6  | -0.105200000    | 3.33000012E-02  | -3.20999995E-02 |        |        |
| 0 | 7  | -0.247400001    | 2.47000009E-02  | -9.20000020E-03 |        |        |
| 0 | 8  | 4.60000010E-03  | -1.84000004E-02 | -0.316300005    |        |        |
| 0 | 9  | -0.162799999    | -0.119800001    | 0.176699996     |        |        |
| 0 | 10 | 1.96000002E-02  | 5.53999990E-02  | 0.229000002     |        |        |
| 0 | 11 | 0.1329          | -0.0995         | 0.3232          | 0.1321 | 0.0258 |
| 0 | 12 | -0.0032         | -0.1971         | -0.2498         | 0.1013 | 0.0199 |
| 0 | 13 | -0.0162         | -0.1276         | 0.2716          | 0.0903 | 0.0178 |
| 0 | 14 | -0.1047         | -0.0996         | 0.1709          | 0.0501 | 0.0100 |
| 0 | 15 | -0.2021         | -0.0943         | 0.2591          | 0.1169 | 0.0235 |

|    |    |         |              |                 |              |        |
|----|----|---------|--------------|-----------------|--------------|--------|
| 0  | 16 | 0.0825  | -0.0494      | -0.1475         | 0.0310       | 0.0063 |
|    | 1  | 1       | 5.96059990   | 0.484699994     | 0.634100020  |        |
|    | 2  | 2       | -3.01929998  | -4.56850004     | -1.55170000  |        |
|    | 3  | 3       | -4.44000006  | -1.71519995     | -0.831600010 |        |
|    | 4  | 4       | -2.21269989  | 0.906300008     | 0.133900002  |        |
|    | 5  | 5       | -2.41790009  | 5.34119987      | 0.750199974  |        |
|    | 6  | 6       | -1.40020001  | 1.07319999      | -1.00660002  |        |
|    | 7  | 7       | -0.415499985 | 8.52770042      | -2.47900009  |        |
|    | 8  | 8       | 0.808600008  | -2.75939989     | -0.574899971 |        |
|    | 9  | 9       | 6.29449987   | -7.89999962E-03 | 0.661000013  |        |
|    | 10 | 10      | 1.28400004   | 1.23549998      | -2.00029993  |        |
| 11 | 11 | -0.8846 | -0.0528      | 0.7072          |              |        |
| 12 | 12 | -3.4524 | -2.7081      | -2.6006         |              |        |
| 13 | 13 | -2.9906 | -1.9849      | 0.4471          |              |        |
| 14 | 14 | -6.6475 | -4.7816      | -4.0475         |              |        |
| 15 | 15 | -2.8149 | 3.9473       | 0.6003          |              |        |
| 16 | 16 | -3.3277 | 5.4574       | -1.6607         |              |        |

#### Magnetic moments

|    |                 |              |                |
|----|-----------------|--------------|----------------|
| 1  | 0.298400015     | -0.576499999 | 0.346399993    |
| 2  | -0.694800019    | 0.106399998  | -0.213799998   |
| 3  | -8.37000012E-02 | 0.282700002  | -0.351599991   |
| 4  | 4.17999998E-02  | 0.385800004  | -0.166999996   |
| 5  | 0.235200003     | -0.581200004 | -0.184200004   |
| 6  | 3.28000002E-02  | -0.426699996 | 0.236399993    |
| 7  | 6.92000017E-02  | 0.325800002  | 0.321000010    |
| 8  | 3.13999988E-02  | -0.545700014 | 3.42000015E-02 |
| 9  | -0.291399986    | 0.331499994  | -0.603299975   |
| 10 | -0.306699991    | 0.322299987  | -0.180000007   |
| 11 | 0.1023          | -0.1205      | 0.2647         |
| 12 | -0.0315         | 0.2897       | -0.2990        |
| 13 | -0.2106         | -0.5472      | -0.2614        |
| 14 | 0.3603          | -0.3068      | -0.1255        |
| 15 | 0.1144          | -0.0132      | 0.0575         |
| 16 | 0.2787          | 0.0717       | 0.0623         |

#### Ground energy

-686.912048

#### Excitation energy

6.60580015  
6.79740000  
7.06059980  
7.27920008  
7.37309980  
7.48579979  
7.57060003  
7.75719976  
7.82789993  
7.94430017  
7.9815  
8.0079  
8.0493  
8.1862  
8.2158



8.2628

Structure E-alpha

Number of atoms: 24

|   |          |          |          |
|---|----------|----------|----------|
| 1 | 3.0975   | 0.83995  | -0.32794 |
| 8 | 3.48538  | -0.03114 | -0.13828 |
| 6 | 2.50246  | -0.86652 | 0.43546  |
| 1 | 2.76535  | -1.90037 | 0.19594  |
| 1 | 2.49892  | -0.76821 | 1.53206  |
| 6 | 1.09247  | -0.58381 | -0.07451 |
| 1 | 1.05126  | -0.76614 | -1.15509 |
| 6 | 0.6083   | 0.83812  | 0.19797  |
| 1 | 0.70185  | 1.03547  | 1.27894  |
| 8 | 1.4166   | 1.75464  | -0.5222  |
| 1 | 0.96874  | 2.61681  | -0.51158 |
| 6 | -0.85401 | 0.99602  | -0.20469 |
| 1 | -0.94866 | 0.86356  | -1.28591 |
| 8 | -1.25423 | 2.34194  | 0.05015  |
| 1 | -1.66883 | 2.41531  | 0.92203  |
| 6 | -1.71045 | -0.05369 | 0.49174  |
| 1 | -1.6563  | 0.09322  | 1.58121  |
| 8 | -3.05306 | -0.03981 | 0.05049  |
| 1 | -3.59727 | 0.49926  | 0.63823  |
| 6 | -1.12295 | -1.44337 | 0.21559  |
| 8 | 0.23013  | -1.49456 | 0.61268  |
| 1 | -1.62813 | -2.19334 | 0.83167  |
| 8 | -1.28291 | -1.71006 | -1.14627 |
| 1 | -1.01467 | -2.62419 | -1.32156 |

Electric dipoles

|   |    |                 |                 |                 |             |
|---|----|-----------------|-----------------|-----------------|-------------|
| 0 | 0  | -3.58360004     | 0.235200003     | 3.08489990      |             |
| 0 | 1  | -1.20999999E-02 | -0.170000002    | 8.16999972E-02  |             |
| 0 | 2  | -7.68000036E-02 | -9.47000012E-02 | -0.108900003    |             |
| 0 | 3  | 8.87999982E-02  | 5.62999994E-02  | 5.68000004E-02  |             |
| 0 | 4  | 0.151299998     | 7.94000030E-02  | 0.205500007     |             |
| 0 | 5  | 7.24000037E-02  | -0.139300004    | 5.92000000E-02  |             |
| 0 | 6  | -5.00999987E-02 | -1.61000006E-02 | 0.160899997     |             |
| 0 | 7  | 1.65999997E-02  | 1.13000004E-02  | 9.13999975E-02  |             |
| 0 | 8  | -0.108300000    | 0.112099998     | 0.247899994     |             |
| 0 | 9  | -0.274599999    | -7.85000026E-02 | -4.99999989E-03 |             |
| 0 | 10 | -0.146699995    | -0.102200001    | -5.33000007E-02 |             |
| 0 | 11 | -0.0969         | -0.0630         | 0.3581          |             |
| 0 | 12 | 0.0801          | -0.1490         | 0.0375          |             |
| 0 | 13 | -0.1436         | -0.2226         | 0.0926          |             |
| 0 | 14 | 0.0903          | 0.0746          | 0.1253          |             |
| 0 | 15 | -0.0306         | 0.0411          | -0.1202         |             |
| 0 | 16 | 0.0555          | -0.0100         | 0.0014          |             |
|   | 1  | 1               | 1.43850005      | -3.24099994     | -1.83910000 |
|   | 2  | 2               | 1.47440004      | -2.84739995     | -1.45350003 |
|   | 3  | 3               | -2.02679992     | -4.14150000     | 1.37979996  |
|   | 4  | 4               | -2.27430010     | 5.95489979      | 2.88479996  |
|   | 5  | 5               | -2.15980005     | -3.76239991     | 1.20980000  |
|   | 6  | 6               | 9.44340038      | -3.41240001     | -1.33560002 |

|    |    |              |              |                 |
|----|----|--------------|--------------|-----------------|
| 7  | 7  | 1.78520000   | 5.96099997   | 3.15490007      |
| 8  | 8  | 0.467799991  | -0.366800010 | -0.128600001    |
| 9  | 9  | -1.11660004  | -1.13810003  | 1.00160003      |
| 10 | 10 | -0.173099995 | 1.55390000   | -2.30000005E-03 |
| 11 | 11 | 4.2199       | 0.2617       | 1.0464          |
| 12 | 12 | -1.3481      | 1.8788       | 3.0193          |
| 13 | 13 | -0.3294      | -1.7056      | -0.2396         |
| 14 | 14 | -0.2759      | 0.9669       | -0.2261         |
| 15 | 15 | -0.2903      | -1.4227      | -0.1269         |
| 16 | 16 | 1.5326       | 0.7414       | 1.2596          |

#### Magnetic moments

|    |                 |                |              |
|----|-----------------|----------------|--------------|
| 1  | 0.108599998     | -0.315200001   | -0.227400005 |
| 2  | 0.182699993     | 0.243399993    | -0.588699996 |
| 3  | -0.309700012    | 0.455799997    | -0.182500005 |
| 4  | -7.72999972E-02 | 0.131500006    | -0.318500012 |
| 5  | -0.535200000    | 0.131799996    | 0.194999993  |
| 6  | -7.80000016E-02 | 0.474099994    | -0.159600005 |
| 7  | 0.203500003     | 0.243100002    | -0.247400001 |
| 8  | 0.320600003     | 0.446000010    | 0.363400012  |
| 9  | 0.254799992     | -0.516900003   | -0.301099986 |
| 10 | -0.316700011    | 1.18000004E-02 | -0.250200003 |
| 11 | 0.0993          | 0.4600         | 0.0597       |
| 12 | -0.1306         | 0.2516         | 0.0425       |
| 13 | -0.2767         | -0.1520        | -0.5021      |
| 14 | 0.0327          | 0.3211         | 0.0581       |
| 15 | 0.0635          | 0.0086         | 0.4691       |
| 16 | -0.3639         | 0.0082         | 0.1538       |

#### Ground energy

-686.916565

#### Excitation energies

6.39370012  
 6.79099989  
 7.10580015  
 7.30039978  
 7.38059998  
 7.49919987  
 7.59200001  
 7.61269999  
 7.71509981  
 7.76999998  
 7.8000  
 7.9052  
 7.9928  
 8.0773  
 8.1230  
 8.2354

#### Structure F-alpha

Number of atoms : 24

|   |          |          |          |
|---|----------|----------|----------|
| 1 | -3.18635 | 0.87255  | 0.00315  |
| 8 | -3.47059 | -0.04599 | 0.12666  |
| 6 | -2.4975  | -0.91225 | -0.40955 |

|   |          |          |          |
|---|----------|----------|----------|
| 1 | -2.76508 | -1.92523 | -0.10123 |
| 1 | -2.50486 | -0.88609 | -1.5111  |
| 6 | -1.07819 | -0.60906 | 0.06861  |
| 1 | -1.0133  | -0.83453 | 1.13983  |
| 6 | -0.62094 | 0.83752  | -0.14149 |
| 1 | -0.73752 | 1.06105  | -1.21814 |
| 8 | -1.43333 | 1.72466  | 0.60935  |
| 1 | -1.21051 | 2.6282   | 0.3374   |
| 6 | 0.85306  | 1.02168  | 0.21407  |
| 1 | 0.98169  | 0.93033  | 1.29519  |
| 8 | 1.25585  | 2.35185  | -0.10028 |
| 1 | 1.36809  | 2.43603  | -1.05984 |
| 6 | 1.713    | -0.03046 | -0.48062 |
| 1 | 1.67205  | 0.13169  | -1.56825 |
| 8 | 3.04973  | -0.00341 | -0.0203  |
| 1 | 3.62378  | 0.40402  | -0.68042 |
| 6 | 1.13285  | -1.42651 | -0.22581 |
| 8 | -0.20791 | -1.47503 | -0.65621 |
| 1 | 1.66137  | -2.16394 | -0.83576 |
| 8 | 1.2554   | -1.71469 | 1.13815  |
| 1 | 1.50379  | -2.63864 | 1.26892  |

# Electric dipoles

|    |    |                 |                 |                 |              |        |
|----|----|-----------------|-----------------|-----------------|--------------|--------|
| 0  | 0  | 3.29229999      | -3.88999991E-02 | -4.03560019     |              |        |
| 0  | 1  | -2.52999999E-02 | 0.103000000     | 8.87999982E-02  |              |        |
| 0  | 2  | 3.24999988E-02  | 0.167999998     | 4.10000002E-03  |              |        |
| 0  | 3  | -0.232500002    | 6.67999983E-02  | -2.64999997E-02 |              |        |
| 0  | 4  | 0.112700000     | 0.164499998     | 1.11999996E-02  |              |        |
| 0  | 5  | 3.80000006E-03  | 2.58000009E-02  | -0.188099995    |              |        |
| 0  | 6  | 0.230299994     | -0.224600002    | 3.53000015E-02  |              |        |
| 0  | 7  | 7.24999979E-02  | 0.118900001     | 0.149900004     |              |        |
| 0  | 8  | 0.294099987     | 8.22999999E-02  | -0.255800009    |              |        |
| 0  | 9  | -0.118299998    | 0.155300006     | 3.10999993E-02  |              |        |
| 0  | 10 | -1.46000003E-02 | 1.65999997E-02  | 4.39000018E-02  |              |        |
| 0  | 11 | 0.2314          | -0.0908         | 0.1681          | 0.0900       | 0.0172 |
| 0  | 12 | -0.0439         | 0.0359          | -0.0601         | 0.0068       | 0.0013 |
| 0  | 13 | -0.0299         | 0.1054          | -0.3104         | 0.1084       | 0.0210 |
| 0  | 14 | 0.1404          | 0.1245          | 0.2055          | 0.0775       | 0.0152 |
| 0  | 15 | 0.0278          | -0.1661         | -0.2172         | 0.0755       | 0.0149 |
| 0  | 16 | 0.0756          | -0.0979         | 0.0429          | 0.0171       | 0.0034 |
|    | 1  | 1               | -0.672599971    | -2.99119997     | 1.46500003   |        |
|    | 2  | 2               | 0.883700013     | -4.47310019     | 0.322800010  |        |
|    | 3  | 3               | 2.35630012      | -4.66750002     | -0.777400017 |        |
|    | 4  | 4               | 1.20630002      | -2.97839999     | -0.510299981 |        |
|    | 5  | 5               | 0.753700018     | 5.42589998      | -2.97219992  |        |
|    | 6  | 6               | 1.87950003      | -4.40089989     | 0.458099991  |        |
|    | 7  | 7               | -2.00200009     | 3.53340006      | -2.25370002  |        |
|    | 8  | 8               | -1.98559999     | -0.352400005    | -0.824000001 |        |
|    | 9  | 9               | -1.03279996     | 0.908200026     | -1.45930004  |        |
|    | 10 | 10              | 0.150999993     | 3.01869988      | -3.31769991  |        |
| 11 | 11 | -2.0892         | -0.6333         | -1.0829         |              |        |
| 12 | 12 | 0.4341          | 0.7993          | -2.5828         |              |        |
| 13 | 13 | -1.2531         | 1.4122          | -1.4468         |              |        |

|    |    |         |         |         |
|----|----|---------|---------|---------|
| 14 | 14 | -1.2899 | -0.9838 | -0.3641 |
| 15 | 15 | -1.3867 | 0.4054  | -1.6513 |
| 16 | 16 | -0.3609 | -2.6547 | -0.1448 |

Magnetic moments

|    |                 |                |                |
|----|-----------------|----------------|----------------|
| 1  | 0.196999997     | 0.353399992    | -0.153300002   |
| 2  | -2.65999995E-02 | -0.307900012   | -0.383500010   |
| 3  | 0.342599988     | 0.325700015    | -0.427300006   |
| 4  | -0.218700007    | -0.113499999   | 0.577099979    |
| 5  | 7.95999989E-02  | 7.60000013E-03 | 8.59000012E-02 |
| 6  | 0.439799994     | -0.305000007   | 0.680999994    |
| 7  | 0.137700006     | -0.465499997   | -0.551199973   |
| 8  | 6.23000003E-02  | 0.457899988    | -0.247700006   |
| 9  | 0.166099995     | 0.137199998    | -0.100100003   |
| 10 | 0.182999998     | 8.03999975E-02 | 0.140900001    |
| 11 | -0.0376         | -0.2687        | 0.1196         |
| 12 | -0.1950         | 0.1822         | -0.2335        |
| 13 | -0.1124         | 0.0317         | -0.0104        |
| 14 | -0.4148         | -0.0159        | 0.0679         |
| 15 | -0.4225         | 0.4701         | -0.0761        |
| 16 | 0.3530          | 0.0312         | -0.1010        |

Ground energy

-686.912170

Excitation energy

6.33839989  
6.64239979  
6.89659977  
7.16510010  
7.27829981  
7.37559986  
7.44759989  
7.51889992  
7.63420010  
7.71939993  
7.7913  
7.8220  
7.9221  
8.0096  
8.0450  
8.1568

Structure G-alpha

Number of atoms: 24

|   |          |          |          |
|---|----------|----------|----------|
| 1 | -3.4746  | 0.73465  | -0.25684 |
| 8 | -3.45899 | -0.11145 | 0.21349  |
| 6 | -2.47284 | -0.94687 | -0.36507 |
| 1 | -2.68798 | -1.96631 | -0.03833 |
| 1 | -2.52549 | -0.92643 | -1.46185 |
| 6 | -1.05625 | -0.57837 | 0.07307  |
| 1 | -0.96773 | -0.76496 | 1.15404  |
| 6 | -0.64943 | 0.87462  | -0.20681 |
| 1 | -0.74908 | 1.0794   | -1.28123 |
| 8 | -1.48457 | 1.80987  | 0.4546   |

|   |          |          |          |
|---|----------|----------|----------|
| 1 | -1.89098 | 1.39214  | 1.22938  |
| 6 | 0.81597  | 1.0731   | 0.19639  |
| 1 | 0.88438  | 0.94639  | 1.28521  |
| 8 | 1.25825  | 2.38538  | -0.07832 |
| 1 | 1.82767  | 2.38666  | -0.86061 |
| 6 | 1.69325  | 0.02093  | -0.48715 |
| 1 | 1.68701  | 0.21794  | -1.56705 |
| 8 | 3.04611  | 0.1191   | -0.09771 |
| 1 | 3.12558  | -0.26917 | 0.78844  |
| 6 | 1.15031  | -1.39665 | -0.29031 |
| 8 | -0.19781 | -1.47482 | -0.6286  |
| 1 | 1.66429  | -2.08499 | -0.96681 |
| 8 | 1.3565   | -1.79951 | 1.05545  |
| 1 | 2.06492  | -2.45446 | 1.10359  |

#### Electric dipoles

|    |    |                 |                 |                 |                 |        |
|----|----|-----------------|-----------------|-----------------|-----------------|--------|
| 0  | 0  | 1.72950006      | -3.22770000     | -0.978699982    |                 |        |
| 0  | 1  | -0.203700006    | -2.80000009E-02 | -0.103100002    |                 |        |
| 0  | 2  | 0.159899995     | -0.143999994    | -0.143299997    |                 |        |
| 0  | 3  | 8.30999985E-02  | 5.27999997E-02  | 0.316500008     |                 |        |
| 0  | 4  | 4.52999994E-02  | 0.179600000     | -0.159199998    |                 |        |
| 0  | 5  | -0.233500004    | 0.249300003     | -6.03000000E-02 |                 |        |
| 0  | 6  | 0.166600004     | 0.171499997     | 6.78000003E-02  |                 |        |
| 0  | 7  | 0.224500000     | -2.72000004E-02 | -4.58000004E-02 |                 |        |
| 0  | 8  | -4.98999991E-02 | 7.19999969E-02  | 6.09999988E-03  |                 |        |
| 0  | 9  | 1.53999999E-02  | -6.99999975E-04 | 0.100800000     |                 |        |
| 0  | 10 | 9.82000008E-02  | 1.76999997E-02  | -6.67999983E-02 |                 |        |
| 0  | 11 | -0.0875         | 0.0078          | 0.1240          | 0.0231          | 0.0045 |
| 0  | 12 | 0.3148          | 0.1491          | 0.1125          | 0.1340          | 0.0262 |
| 0  | 13 | 0.0368          | 0.2578          | 0.2726          | 0.1421          | 0.0284 |
| 0  | 14 | 0.0087          | 0.1207          | 0.1688          | 0.0431          | 0.0086 |
| 0  | 15 | 0.0842          | 0.3533          | -0.2982         | 0.2208          | 0.0445 |
| 0  | 16 | 0.0311          | -0.1258         | -0.1147         | 0.0299          | 0.0061 |
|    | 1  | 1               | 5.28230000      | -4.64440012     | -1.25440001     |        |
|    | 2  | 2               | -2.87140012     | 2.47280002      | -2.81480002     |        |
|    | 3  | 3               | -2.08990002     | -3.90680003     | 3.75029993      |        |
|    | 4  | 4               | -1.21169996     | -0.293500006    | -1.82400000     |        |
|    | 5  | 5               | -2.79480004     | 2.45840001      | 0.186800003     |        |
|    | 6  | 6               | -2.88150001     | 0.460099995     | -9.48999971E-02 |        |
|    | 7  | 7               | 0.184000000     | -1.08990002     | 0.580200016     |        |
|    | 8  | 8               | 3.72989988      | -4.08269978     | 1.25849998      |        |
|    | 9  | 9               | -0.709200025    | -2.45239997     | 1.24129999      |        |
|    | 10 | 10              | -9.30000003E-03 | -0.383300006    | -2.34859991     |        |
| 11 | 11 | 3.4263          | -2.4035         | -3.0387         | Tot=            | 5.1721 |
| 12 | 12 | 2.6380          | -0.3815         | -1.5272         | Tot=            | 3.0719 |
| 13 | 13 | 2.8893          | -0.1995         | -0.0857         | Tot=            | 2.8975 |
| 14 | 14 | -0.0622         | 0.4467          | -0.4042         | Tot=            | 0.6057 |
| 15 | 15 | 0.8602          | -1.0197         | 2.5304          | Tot=            | 2.8606 |
| 16 | 16 | -0.5762         | -1.2728         | 2.8810          | Tot=            | 3.2019 |

#### Magnetic moment

|   |                |                |              |
|---|----------------|----------------|--------------|
| 1 | 3.99999990E-04 | 0.762899995    | -0.488999993 |
| 2 | 9.36999992E-02 | -0.205300003   | 0.294400007  |
| 3 | -0.265399992   | 4.76000011E-02 | 0.494899988  |

|    |                 |                 |                 |
|----|-----------------|-----------------|-----------------|
| 4  | -2.67999992E-02 | 8.25999975E-02  | 0.256700009     |
| 5  | 6.93000033E-02  | -3.50000011E-03 | -0.214699998    |
| 6  | 0.644500017     | 6.71000034E-02  | -0.765600026    |
| 7  | -1.00000005E-03 | 0.185699999     | -0.301299989    |
| 8  | 9.10999998E-02  | -0.213799998    | -0.192399994    |
| 9  | -0.290600002    | -4.89999987E-02 | -3.02000009E-02 |
| 10 | -0.345400006    | 0.324600011     | -0.185699999    |
| 11 | -0.1996         | -0.1748         | -0.3405         |
| 12 | -0.2165         | -0.1814         | 0.4792          |
| 13 | -0.1544         | -0.1977         | 0.1645          |
| 14 | -0.1916         | 0.0544          | -0.1134         |
| 15 | -0.1819         | 0.2069          | -0.3250         |
| 16 | -0.4788         | 0.5269          | -0.2067         |

Ground energy

-686.908936

Excitation energies

6.71420002

6.83790016

6.93120003

7.08479977

7.26609993

7.42189980

7.46799994

7.54969978

7.67500019

7.88180017

7.9106

7.9850

8.1596

8.1837

8.2197

8.2599

Structure H-alpha

Number of atoms: 24

|   |          |          |          |
|---|----------|----------|----------|
| 1 | -4.11961 | 0.27249  | -0.57445 |
| 8 | -3.43274 | 0.05574  | 0.06972  |
| 6 | -2.45555 | -0.78616 | -0.54201 |
| 1 | -2.73227 | -1.83928 | -0.41897 |
| 1 | -2.36649 | -0.57551 | -1.61474 |
| 6 | -1.10439 | -0.54403 | 0.11839  |
| 1 | -1.18516 | -0.69329 | 1.20185  |
| 6 | -0.59478 | 0.88826  | -0.11559 |
| 1 | -0.7728  | 1.17493  | -1.16621 |
| 8 | -1.25527 | 1.76653  | 0.77043  |
| 1 | -2.19412 | 1.79408  | 0.52772  |
| 6 | 0.90023  | 0.99504  | 0.17677  |
| 1 | 1.03845  | 0.87364  | 1.25529  |
| 8 | 1.43393  | 2.27214  | -0.11361 |
| 1 | 1.40039  | 2.43184  | -1.06927 |
| 6 | 1.65466  | -0.10713 | -0.56049 |
| 1 | 1.47169  | -0.01284 | -1.64086 |

|   |          |          |          |
|---|----------|----------|----------|
| 8 | 3.05004  | -0.04142 | -0.37755 |
| 1 | 3.25141  | 0.54011  | 0.36986  |
| 6 | 1.1072   | -1.47332 | -0.15319 |
| 8 | -0.26699 | -1.54252 | -0.47217 |
| 1 | 1.57273  | -2.27179 | -0.73863 |
| 8 | 1.33374  | -1.66317 | 1.22027  |
| 1 | 0.6899   | -2.30875 | 1.54856  |

#### Electric dipoles

|    |    |                 |                 |                 |              |        |
|----|----|-----------------|-----------------|-----------------|--------------|--------|
| 0  | 0  | -3.79780006     | -1.36199999     | -2.83240008     |              |        |
| 0  | 1  | 0.115199998     | 0.185100004     | 5.02000004E-02  |              |        |
| 0  | 2  | -2.51000002E-02 | 1.99999996E-02  | -0.122400001    |              |        |
| 0  | 3  | 0.179700002     | -0.101999998    | -3.18000019E-02 |              |        |
| 0  | 4  | 8.83999988E-02  | -0.151800007    | 0.103100002     |              |        |
| 0  | 5  | -1.59000009E-02 | 0.109899998     | -1.35000004E-02 |              |        |
| 0  | 6  | 3.59999994E-03  | 8.78999978E-02  | -0.354200006    |              |        |
| 0  | 7  | -1.26999998E-02 | 5.49999997E-03  | -7.20999986E-02 |              |        |
| 0  | 8  | 1.09999999E-02  | 0.121799998     | 8.65999982E-02  |              |        |
| 0  | 9  | 5.11000007E-02  | -0.180800006    | -2.51000002E-02 |              |        |
| 0  | 10 | -0.122800000    | -4.05000001E-02 | 0.106399998     |              |        |
| 0  | 11 | -0.0290         | -0.2398         | -0.1330         | 0.0760       | 0.0146 |
| 0  | 12 | 0.0388          | -0.1830         | 0.0096          | 0.0351       | 0.0068 |
| 0  | 13 | 0.1057          | 0.2395          | 0.0399          | 0.0701       | 0.0137 |
| 0  | 14 | -0.2117         | 0.2019          | 0.0321          | 0.0866       | 0.0171 |
| 0  | 15 | -0.0135         | 0.0721          | -0.0154         | 0.0056       | 0.0011 |
| 0  | 16 | -0.0175         | 0.4209          | -0.0718         | 0.1826       | 0.0369 |
|    | 1  | 1               | 2.65330005      | -2.77390003     | 0.934300005  |        |
|    | 2  | 2               | -0.148599997    | -4.23229980     | 2.01220012   |        |
|    | 3  | 3               | -1.91410005     | -3.89619994     | 1.72800004   |        |
|    | 4  | 4               | -2.80749989     | 3.58410001      | -4.95620012  |        |
|    | 5  | 5               | -3.88989997     | -3.60249996     | -1.06480002  |        |
|    | 6  | 6               | -3.77060008     | -2.24020004     | -0.656099975 |        |
|    | 7  | 7               | -0.518800020    | 0.768999994     | -1.93990004  |        |
|    | 8  | 8               | -3.04080009     | 1.43040001      | -1.82299995  |        |
|    | 9  | 9               | 2.05539989      | -1.91009998     | -0.475600004 |        |
|    | 10 | 10              | -0.496499985    | -1.59340000     | -0.939700007 |        |
| 11 | 11 | -3.6080         | -1.3731         | -0.2397         | Tot=         | 3.8679 |
| 12 | 12 | 3.6290          | 0.6710          | -1.1149         | Tot=         | 3.8553 |
| 13 | 13 | -0.3797         | 4.5867          | -4.9134         | Tot=         | 6.7323 |
| 14 | 14 | -3.3302         | -0.2530         | 0.0727          | Tot=         | 3.3406 |
| 15 | 15 | -0.9201         | 2.1514          | -2.1538         | Tot=         | 3.1802 |
| 16 | 16 | 0.2729          | 1.6530          | -1.4715         | Tot=         | 2.2298 |

#### Magnetic moments

|    |                |                 |                 |
|----|----------------|-----------------|-----------------|
| 1  | 0.335999995    | -6.78000003E-02 | 0.716600001     |
| 2  | -0.277200013   | -9.45999995E-02 | -0.128800005    |
| 3  | 5.93999997E-02 | 0.305599988     | 0.617100000     |
| 4  | 4.34999987E-02 | -0.281500012    | -0.626500010    |
| 5  | 0.289099991    | -0.282400012    | -0.350499988    |
| 6  | -0.213799998   | -0.213799998    | 7.60000013E-03  |
| 7  | 0.412699997    | 0.220799997     | -5.66999987E-02 |
| 8  | -0.548600018   | 9.10999998E-02  | 0.165700004     |
| 9  | -0.232800007   | -0.229200006    | 8.06000009E-02  |
| 10 | -0.462500006   | -0.361299992    | -0.506399989    |

|    |         |         |        |
|----|---------|---------|--------|
| 11 | 0.3370  | -0.0655 | 0.2026 |
| 12 | 0.0100  | 0.3814  | 0.0046 |
| 13 | 0.3161  | 0.3854  | 0.3071 |
| 14 | 0.0839  | 0.1610  | 0.0537 |
| 15 | 0.0185  | -0.2448 | 0.0191 |
| 16 | -0.0608 | 0.3117  | 0.4323 |

Energy ground

-686.912109

Excitation energy

6.66590023

6.95709991

7.01370001

7.04230022

7.25120020

7.33300018

7.56610012

7.61250019

7.71820021

7.79879999

7.8311

7.9417

8.0016

8.0732

8.1998

8.2393

Structure I-alpha

Number of atoms: 24

|   |          |          |          |
|---|----------|----------|----------|
| 1 | -2.32995 | -0.89257 | -1.58911 |
| 8 | -2.97086 | -0.30868 | -1.15419 |
| 6 | -2.67738 | -0.32141 | 0.23042  |
| 1 | -3.16245 | 0.55138  | 0.67212  |
| 1 | -3.08242 | -1.22853 | 0.70002  |
| 6 | -1.18357 | -0.26307 | 0.50112  |
| 1 | -1.00178 | -0.3782  | 1.57616  |
| 6 | -0.53106 | 1.03264  | 0.02117  |
| 1 | -0.78764 | 1.19823  | -1.0347  |
| 8 | -1.03087 | 2.09141  | 0.81303  |
| 1 | -0.44382 | 2.85153  | 0.67521  |
| 6 | 0.9798   | 0.91896  | 0.15664  |
| 1 | 1.23715  | 0.79603  | 1.2148   |
| 8 | 1.55229  | 2.12826  | -0.34228 |
| 1 | 2.32739  | 2.35486  | 0.18862  |
| 6 | 1.48076  | -0.28835 | -0.62034 |
| 1 | 1.201    | -0.17184 | -1.67508 |
| 8 | 2.88045  | -0.45309 | -0.49652 |
| 1 | 3.31278  | 0.04074  | -1.20613 |
| 6 | 0.77386  | -1.53922 | -0.10404 |
| 8 | -0.62533 | -1.37532 | -0.21657 |
| 1 | 1.00947  | -2.4046  | -0.73032 |
| 8 | 1.16625  | -1.74777 | 1.22137  |
| 1 | 0.8904   | -2.63283 | 1.49989  |



## Electric dipoles

|    |    |                 |                |                 |               |
|----|----|-----------------|----------------|-----------------|---------------|
| 0  | 0  | 3.06620002      | -0.981700003   | 0.136700004     |               |
| 0  | 1  | 7.69999996E-02  | 0.105700001    | -4.01999988E-02 |               |
| 0  | 2  | 3.37000005E-02  | 0.208000004    | 0.201100007     |               |
| 0  | 3  | 0.201299995     | 5.97999990E-02 | 3.53999995E-02  |               |
| 0  | 4  | -0.247199997    | 9.10000037E-03 | -4.19999985E-03 |               |
| 0  | 5  | 0.228000000     | -0.206499994   | 5.70000000E-02  |               |
| 0  | 6  | -1.04000000E-02 | -0.117200002   | 7.85999969E-02  |               |
| 0  | 7  | -0.266400009    | -0.235300004   | 0.129800007     |               |
| 0  | 8  | 5.53000011E-02  | -0.170499995   | 7.59999976E-02  |               |
| 0  | 9  | 8.26999992E-02  | -0.257900000   | 0.166600004     |               |
| 0  | 10 | -4.08000015E-02 | -0.104900002   | 0.101899996     |               |
| 0  | 11 | 0.0153          | 0.0292         | -0.1363         | 0.0197 0.0039 |
| 0  | 12 | 0.0454          | -0.0841        | -0.0458         | 0.0112 0.0022 |
| 0  | 13 | -0.0015         | 0.0818         | 0.0397          | 0.0083 0.0016 |
| 0  | 14 | 0.0941          | -0.0667        | -0.4298         | 0.1981 0.0397 |
| 0  | 15 | 0.0152          | -0.0009        | 0.1137          | 0.0132 0.0026 |
| 0  | 16 | 0.1158          | 0.0066         | -0.4654         | 0.2301 0.0468 |
|    | 1  | -2.44650006     | -4.40740013    | 1.35609996      |               |
|    | 2  | -2.43999995E-02 | -2.17829990    | 1.99689996      |               |
|    | 3  | 1.85350001      | 1.92279994     | 3.66479993      |               |
|    | 4  | 2.62000002E-02  | -2.98650002    | -0.852699995    |               |
|    | 5  | 1.82760000      | 3.63229990     | -1.57459998     |               |
|    | 6  | 2.26430011      | -0.485100001   | -0.616800010    |               |
|    | 7  | 2.46000004      | 4.65170002     | -3.07870007     |               |
|    | 8  | 2.63070011      | 2.38459992     | -2.48160005     |               |
|    | 9  | 2.20289993      | 7.44080019     | -0.136199996    |               |
|    | 10 | -6.25409985     | -5.03009987    | 1.38999999      |               |
| 11 | 11 | -0.7238         | -0.8604        | -1.4984 Tot=    | 1.8733        |
| 12 | 12 | 0.3655          | 1.1233         | -0.0536 Tot=    | 1.1825        |
| 13 | 13 | -3.0533         | 0.3192         | 1.9236 Tot=     | 3.6228        |
| 14 | 14 | 0.8276          | -1.6717        | 2.5488 Tot=     | 3.1584        |
| 15 | 15 | -7.0035         | -7.2021        | 1.5173 Tot=     | 10.1598       |
| 16 | 16 | 2.5373          | 4.1377         | -1.7290 Tot=    | 5.1525        |

## Magnetic moments

|    |                |                |                 |
|----|----------------|----------------|-----------------|
| 1  | 0.339899987    | 0.279599994    | -0.124899998    |
| 2  | -0.393700004   | 3.72000001E-02 | -0.473300010    |
| 3  | -0.484200001   | 0.252900004    | 0.277500004     |
| 4  | 0.181299999    | 0.244499996    | -0.687099993    |
| 5  | 0.105099998    | -0.359600008   | -9.29000005E-02 |
| 6  | -0.416700006   | 5.16000018E-02 | -0.620500028    |
| 7  | 0.500299990    | -0.135399997   | 6.49999976E-02  |
| 8  | 1.57999992E-02 | -0.670000017   | 3.81999984E-02  |
| 9  | 0.437400013    | -0.208399996   | -0.247899994    |
| 10 | -0.210899994   | -0.370400012   | 0.179499999     |
| 11 | 0.3706         | 0.2117         | 0.2085          |
| 12 | 0.0539         | -0.3313        | 0.0115          |
| 13 | 0.0836         | 0.0078         | -0.3541         |
| 14 | 0.4182         | -0.3416        | 0.5442          |
| 15 | -0.2055        | -0.1683        | -0.1494         |
| 16 | 0.6797         | -0.0937        | 0.0563          |

## Energy ground

-686.923096  
Excitation energy  
6.56209993  
6.96950006  
7.12620020  
7.25600004  
7.33290005  
7.60230017  
7.65969992  
7.75500011  
7.86969995  
7.93230009  
8.0088  
8.0386  
8.0856  
8.1867  
8.1999  
8.3049

Structure L-alpha  
Number of atoms 24

|   |          |          |          |
|---|----------|----------|----------|
| 1 | -2.40745 | 0.02159  | -1.60495 |
| 8 | -3.12281 | -0.28364 | -1.03278 |
| 6 | -2.64584 | -0.51667 | 0.28181  |
| 1 | -3.13469 | 0.18836  | 0.96296  |
| 1 | -2.92862 | -1.53534 | 0.56778  |
| 6 | -1.14465 | -0.38099 | 0.46438  |
| 1 | -0.92426 | -0.52171 | 1.52997  |
| 6 | -0.56506 | 0.96014  | 0.01719  |
| 1 | -0.79487 | 1.13678  | -1.04433 |
| 8 | -1.15133 | 1.97372  | 0.81245  |
| 1 | -0.90629 | 2.8333   | 0.44024  |
| 6 | 0.95778  | 0.95652  | 0.1624   |
| 1 | 1.20222  | 0.81347  | 1.22352  |
| 8 | 1.49591  | 2.18924  | -0.29841 |
| 1 | 1.59587  | 2.79819  | 0.44499  |
| 6 | 1.54592  | -0.19103 | -0.64941 |
| 1 | 1.31672  | -0.03612 | -1.70818 |
| 8 | 2.94577  | -0.30768 | -0.56807 |
| 1 | 3.23557  | -0.09511 | 0.33054  |
| 6 | 0.87335  | -1.49474 | -0.19997 |
| 8 | -0.52846 | -1.42105 | -0.30363 |
| 1 | 1.16715  | -2.31854 | -0.85585 |
| 8 | 1.28822  | -1.73248 | 1.12432  |
| 1 | 1.03126  | -2.62915 | 1.38389  |

Electric moments

|   |   |                 |                 |                 |
|---|---|-----------------|-----------------|-----------------|
| 0 | 0 | 1.46659994      | 0.537199974     | 2.46210003      |
| 0 | 1 | -4.30999994E-02 | 0.136399999     | 8.47999975E-02  |
| 0 | 2 | -3.22000012E-02 | 0.246600002     | 3.46999988E-02  |
| 0 | 3 | 8.32000002E-02  | 3.70999984E-02  | -2.74999999E-02 |
| 0 | 4 | 3.44000012E-02  | -8.79999995E-02 | 0.169000000     |
| 0 | 5 | -0.241999999    | -2.47000009E-02 | -3.00999992E-02 |

|    |    |                 |                 |                 |                |        |
|----|----|-----------------|-----------------|-----------------|----------------|--------|
| 0  | 6  | 0.182600006     | -9.04999971E-02 | -1.81000009E-02 |                |        |
| 0  | 7  | 6.65000007E-02  | -0.210600004    | -0.233799994    |                |        |
| 0  | 8  | -0.141000003    | 0.186399996     | -0.171800002    |                |        |
| 0  | 9  | 0.212899998     | 4.08000015E-02  | 0.248199999     |                |        |
| 0  | 10 | -5.99999987E-02 | -0.253199995    | 1.39999995E-03  |                |        |
| 0  | 11 | -0.1897         | -0.1787         | -0.0653         | 0.0722         | 0.0139 |
| 0  | 12 | 0.2578          | -0.1708         | -0.0815         | 0.1023         | 0.0200 |
| 0  | 13 | -0.0510         | -0.0043         | -0.0855         | 0.0099         | 0.0020 |
| 0  | 14 | -0.0770         | -0.1413         | 0.0987          | 0.0356         | 0.0071 |
| 0  | 15 | 0.0474          | 0.0267          | -0.1323         | 0.0205         | 0.0041 |
| 0  | 16 | 0.0079          | -0.1371         | 0.0601          | 0.0225         | 0.0045 |
|    | 1  | 1               | -0.375699997    | -5.38600016     | 3.92000005E-02 |        |
|    | 2  | 2               | -0.502099991    | -2.02649999     | 6.52839994     |        |
|    | 3  | 3               | -1.94700003     | -1.22230005     | -2.05290008    |        |
|    | 4  | 4               | 1.36689997      | 4.30429983      | 1.06289995     |        |
|    | 5  | 5               | 1.01979995      | -2.89949989     | 2.20499992     |        |
|    | 6  | 6               | 0.763400018     | 0.490599990     | 0.718500018    |        |
|    | 7  | 7               | 1.80149996      | 0.451099992     | 2.06019998     |        |
|    | 8  | 8               | 1.80920005      | -3.37960005     | 0.798500001    |        |
|    | 9  | 9               | 1.02419996      | -1.51329994     | 2.34010005     |        |
|    | 10 | 10              | -2.24379992     | -1.40540004     | -0.960900009   |        |
| 11 | 11 | -1.8194         | 0.4361          | 0.0553          | Tot=           | 1.8717 |
| 12 | 12 | 0.6744          | 6.5079          | 1.0896          | Tot=           | 6.6329 |
| 13 | 13 | -0.2704         | -2.9645         | 0.6525          | Tot=           | 3.0475 |
| 14 | 14 | -0.9991         | 3.2824          | -0.4308         | Tot=           | 3.4580 |
| 15 | 15 | -3.3212         | 3.9599          | -0.7607         | Tot=           | 5.2240 |
| 16 | 16 | 1.1629          | -0.8826         | 2.7225          | Tot=           | 3.0892 |

#### Magnetic moments

|    |                 |                |              |
|----|-----------------|----------------|--------------|
| 1  | -0.143000007    | -0.356500000   | -0.216000006 |
| 2  | -0.568000019    | -0.171900004   | 0.414999992  |
| 3  | 5.53000011E-02  | -0.133000001   | -0.631099999 |
| 4  | -1.15000000E-02 | 5.07000014E-02 | -0.520900011 |
| 5  | 0.263999999     | 0.117399998    | -0.595600009 |
| 6  | 4.17999998E-02  | -0.145699993   | 0.645500004  |
| 7  | -0.404399991    | -0.108099997   | -0.273600012 |
| 8  | 0.219799995     | 0.257400006    | -0.228200004 |
| 9  | -0.395999998    | -0.166700006   | 0.152899995  |
| 10 | 0.186199993     | 0.250299990    | 0.451099992  |
| 11 | 0.3550          | 0.1020         | -0.2018      |
| 12 | 0.0672          | -0.4116        | -0.1535      |
| 13 | -0.4389         | -0.0909        | 0.1115       |
| 14 | -0.2133         | -0.2452        | 0.3722       |
| 15 | -0.3994         | 0.0340         | 0.2179       |
| 16 | -0.2167         | -0.0535        | 0.2699       |

#### Energy ground

-686.913330

#### Excitation energies

6.57690001  
6.94899988  
6.96210003  
7.19589996  
7.27479982

7.56930017  
7.63219976  
7.68889999  
7.71780014  
7.78030014  
7.8342  
7.9866  
8.0835  
8.1410  
8.2154  
8.2411

# Structure M-alpha

Number of atoms: 24

|   |          |          |          |
|---|----------|----------|----------|
| 1 | -3.78739 | 0.62761  | -0.25619 |
| 8 | -3.42335 | -0.06962 | 0.30358  |
| 6 | -2.4935  | -0.84955 | -0.4408  |
| 1 | -2.71488 | -1.90665 | -0.26824 |
| 1 | -2.57928 | -0.65653 | -1.51645 |
| 6 | -1.07516 | -0.56622 | 0.03245  |
| 1 | -1.04411 | -0.74819 | 1.11739  |
| 6 | -0.58221 | 0.85716  | -0.23946 |
| 1 | -0.6319  | 1.05715  | -1.31709 |
| 8 | -1.37465 | 1.86004  | 0.38556  |
| 1 | -1.86648 | 1.46679  | 1.12336  |
| 6 | 0.8756   | 1.00686  | 0.1932   |
| 1 | 0.94047  | 0.86075  | 1.28271  |
| 8 | 1.37641  | 2.28025  | -0.16103 |
| 1 | 0.89876  | 2.94141  | 0.36271  |
| 6 | 1.71522  | -0.05177 | -0.51035 |
| 1 | 1.64491  | 0.11408  | -1.59103 |
| 8 | 3.08501  | -0.02247 | -0.18597 |
| 1 | 3.2123   | 0.42939  | 0.65951  |
| 6 | 1.12607  | -1.43605 | -0.21761 |
| 8 | -0.22681 | -1.50027 | -0.6246  |
| 1 | 1.63988  | -2.19598 | -0.81144 |
| 8 | 1.26639  | -1.6869  | 1.15655  |
| 1 | 1.26768  | -2.64048 | 1.31747  |

# Electric moments

|   |    |                 |                |                 |        |        |
|---|----|-----------------|----------------|-----------------|--------|--------|
| 0 | 0  | -1.88409996     | -1.37179995    | 0.977800012     |        |        |
| 0 | 1  | 0.178599998     | 0.104300000    | 0.121699996     |        |        |
| 0 | 2  | 0.192499995     | 2.74999999E-02 | -1.86999999E-02 |        |        |
| 0 | 3  | -7.58000016E-02 | 3.70000005E-02 | -2.29000002E-02 |        |        |
| 0 | 4  | -1.78999994E-02 | -0.175500005   | 0.261500001     |        |        |
| 0 | 5  | -0.142000005    | 4.50999998E-02 | -0.242699996    |        |        |
| 0 | 6  | 6.44999966E-02  | 0.209099993    | 9.80000012E-03  |        |        |
| 0 | 7  | 0.207300007     | 7.90999979E-02 | -7.94999972E-02 |        |        |
| 0 | 8  | -0.107600003    | -0.252499998   | -0.215900004    |        |        |
| 0 | 9  | -0.171499997    | 0.241500005    | 0.108999997     |        |        |
| 0 | 10 | 0.143399999     | 4.85000014E-02 | 0.234099999     |        |        |
| 0 | 11 | -0.0112         | -0.0027        | 0.0347          | 0.0013 | 0.0003 |
| 0 | 12 | 0.2618          | 0.1733         | -0.1454         | 0.1197 | 0.0236 |

|    |    |         |                |             |                |        |
|----|----|---------|----------------|-------------|----------------|--------|
| 0  | 13 | 0.0906  | -0.1296        | 0.0838      | 0.0320         | 0.0064 |
| 0  | 14 | 0.1718  | -0.0074        | -0.1253     | 0.0453         | 0.0091 |
| 0  | 15 | 0.0816  | 0.1056         | 0.2082      | 0.0611         | 0.0124 |
| 0  | 16 | -0.0183 | -0.1730        | -0.1965     | 0.0689         | 0.0140 |
|    | 1  | 1       | 1.67700005     | -4.14160013 | -0.181199998   |        |
|    | 2  | 2       | -0.837700009   | -4.27409983 | 2.52999999E-02 |        |
|    | 3  | 3       | -4.08230019    | 4.32550001  | -1.88240004    |        |
|    | 4  | 4       | -3.27390003    | -1.15470004 | -1.24000001    |        |
|    | 5  | 5       | -1.36059999    | -2.76830006 | 0.543399990    |        |
|    | 6  | 6       | 4.17999998E-02 | -1.06019998 | 0.648100019    |        |
|    | 7  | 7       | -3.30590010    | 4.52159977  | -0.452399999   |        |
|    | 8  | 8       | 2.56809998     | -1.77419996 | 0.388200015    |        |
|    | 9  | 9       | 3.15000005E-02 | 3.06719995  | 1.67530000     |        |
|    | 10 | 10      | -0.123000003   | 0.911099970 | 1.91989994     |        |
| 11 | 11 | -2.3999 | 5.2599         | 0.3867      | Tot=           | 5.7944 |
| 12 | 12 | -2.7788 | -2.3033        | -0.1884     | Tot=           | 3.6142 |
| 13 | 13 | -1.9654 | -1.5954        | 0.3540      | Tot=           | 2.5561 |
| 14 | 14 | -1.8195 | 0.1083         | 0.5064      | Tot=           | 1.8917 |
| 15 | 15 | -0.9968 | 1.5128         | 1.6602      | Tot=           | 2.4573 |
| 16 | 16 | -1.1351 | 0.1047         | 0.5572      | Tot=           | 1.2688 |

#### Magnetic moments

|    |                |                 |                 |
|----|----------------|-----------------|-----------------|
| 1  | 0.119199999    | -0.602100015    | 0.522300005     |
| 2  | -0.104699999   | 9.66000035E-02  | 0.611699998     |
| 3  | -0.161500007   | 0.115300000     | 0.649699986     |
| 4  | 3.13000008E-02 | 0.110799998     | 3.39000002E-02  |
| 5  | 0.415399998    | 2.29000002E-02  | -0.475499988    |
| 6  | -0.279100001   | -0.189700007    | -0.101499997    |
| 7  | 5.86000010E-02 | -7.85000026E-02 | -0.293399990    |
| 8  | 0.278400004    | 0.248300001     | -1.59999996E-03 |
| 9  | 1.99999995E-04 | 0.284599990     | 0.119800001     |
| 10 | 9.22999978E-02 | -0.391600013    | -0.277700007    |
| 11 | 0.7761         | 0.0803          | 0.2098          |
| 12 | -0.1558        | -0.2922         | 0.4017          |
| 13 | -0.4319        | -0.0342         | -0.0033         |
| 14 | 0.1279         | 0.4046          | -0.2445         |
| 15 | -0.0087        | -0.1954         | 0.3618          |
| 16 | 0.2406         | -0.3447         | -0.2354         |

#### Ground energy

-686.917175

#### Excitation energies

6.61560011  
6.92729998  
7.07070017  
7.23689985  
7.40959978  
7.54110003  
7.56780005  
7.66060019  
7.76859999  
7.82390022  
8.0036  
8.0351

8.1169  
8.1836  
8.2559  
8.2704

# Structure A-beta

Number of atoms: 24

|   |          |          |          |
|---|----------|----------|----------|
| 1 | 4.1559   | -1.15107 | 0.02443  |
| 8 | 3.43629  | -0.76438 | -0.48976 |
| 6 | 2.63646  | 0.06426  | 0.34187  |
| 1 | 2.99379  | 1.09931  | 0.30314  |
| 1 | 2.6476   | -0.28075 | 1.38328  |
| 6 | 1.2114   | 0.0204   | -0.16474 |
| 1 | 1.24486  | 0.03605  | -1.26443 |
| 6 | 0.36906  | 1.2003   | 0.32366  |
| 1 | 0.33857  | 1.19404  | 1.42415  |
| 8 | 0.93582  | 2.41011  | -0.1374  |
| 1 | 0.2235   | 3.06722  | -0.1886  |
| 6 | -1.04045 | 1.02356  | -0.21186 |
| 1 | -0.99565 | 1.08096  | -1.31055 |
| 8 | -1.83071 | 2.09364  | 0.28074  |
| 1 | -2.67971 | 2.07639  | -0.18619 |
| 6 | -1.61693 | -0.331   | 0.16721  |
| 1 | -1.74014 | -0.36721 | 1.25858  |
| 8 | -2.87292 | -0.45875 | -0.48562 |
| 1 | -3.55331 | -0.72562 | 0.14433  |
| 6 | -0.66686 | -1.45841 | -0.24887 |
| 8 | 0.61649  | -1.19264 | 0.28552  |
| 1 | -0.62601 | -1.53753 | -1.34241 |
| 8 | -1.07453 | -2.70204 | 0.21254  |
| 1 | -1.04889 | -2.69391 | 1.18257  |

## Electric moments

|   |    |                 |                 |                |              |        |
|---|----|-----------------|-----------------|----------------|--------------|--------|
| 0 | 0  | -1.96259999     | 0.797900021     | 2.72530007     |              |        |
| 0 | 1  | -3.19999992E-03 | -9.40999985E-02 | 0.116599999    |              |        |
| 0 | 2  | -0.140900001    | -0.104400001    | 1.03000002E-02 |              |        |
| 0 | 3  | 0.119199999     | 2.84000002E-02  | -0.309199989   |              |        |
| 0 | 4  | -8.52999985E-02 | 0.128199995     | 4.28000018E-02 |              |        |
| 0 | 5  | 0.100199997     | 0.195099995     | 0.115900002    |              |        |
| 0 | 6  | 0.200100005     | -7.02000037E-02 | 0.330700010    |              |        |
| 0 | 7  | 3.46000008E-02  | -6.04999997E-02 | 3.07000000E-02 |              |        |
| 0 | 8  | -9.61999968E-02 | 8.07000026E-02  | 0.174199998    |              |        |
| 0 | 9  | -0.128199995    | 0.168500006     | 6.31999969E-02 |              |        |
| 0 | 10 | 5.88000007E-02  | -3.48000005E-02 | -0.159600005   |              |        |
| 0 | 11 | 0.1064          | 0.0764          | -0.0901        | 0.0253       | 0.0050 |
| 0 | 12 | 0.0683          | 0.0855          | -0.3522        | 0.1360       | 0.0269 |
| 0 | 13 | 0.1399          | 0.0213          | -0.1651        | 0.0473       | 0.0094 |
| 0 | 14 | -0.0114         | 0.0194          | 0.0931         | 0.0092       | 0.0018 |
| 0 | 15 | -0.0436         | -0.2018         | -0.0641        | 0.0467       | 0.0094 |
| 0 | 16 | -0.0571         | 0.0945          | -0.0326        | 0.0133       | 0.0027 |
|   | 1  | 1               | 4.94110012      | 2.17589998     | -1.62759995  |        |
|   | 2  | 2               | -8.05329990     | 2.89919996     | -0.316700011 |        |
|   | 3  | 3               | 1.39900005      | -1.39129996    | 2.36800003   |        |

|       |         |             |              |              |
|-------|---------|-------------|--------------|--------------|
| 4     | 4       | 0.393599987 | -2.13459992  | 1.25100005   |
| 5     | 5       | 2.14520001  | -2.25219989  | 3.15129995   |
| 6     | 6       | 0.819400012 | 2.25670004   | 0.671500027  |
| 7     | 7       | 0.102200001 | 3.68390012   | 1.84700000   |
| 8     | 8       | 3.35990000  | 1.28489995   | 0.156100005  |
| 9     | 9       | -4.45330000 | 2.00329995   | -0.953499973 |
| 10    | 10      | -2.45560002 | -1.80890000  | 1.06770003   |
| 11 11 | 2.7616  | 2.2590      | -0.6619 Tot= | 3.6287       |
| 12 12 | 1.9541  | 1.7881      | 0.7825 Tot=  | 2.7619       |
| 13 13 | 5.0497  | 1.5275      | 0.8854 Tot=  | 5.3494       |
| 14 14 | -1.1996 | 0.3961      | 0.9234 Tot=  | 1.5649       |
| 15 15 | 2.3083  | -3.3504     | 0.4567 Tot=  | 4.0941       |
| 16 16 | 2.4514  | 0.5345      | 1.6985 Tot=  | 3.0298       |

#### Magnetic moments

|    |                |                 |                 |
|----|----------------|-----------------|-----------------|
| 1  | 0.467700005    | 0.187500000     | -0.140300006    |
| 2  | 0.279799998    | 4.99999989E-03  | 0.648199975     |
| 3  | 6.44999966E-02 | -2.40000002E-02 | -0.169499993    |
| 4  | 0.792699993    | -5.09999990E-02 | 0.522099972     |
| 5  | 5.05000018E-02 | 0.379099995     | 0.736899972     |
| 6  | -0.258700013   | -9.09999982E-02 | -0.493900001    |
| 7  | 6.97000027E-02 | 0.101700000     | -0.365900010    |
| 8  | -0.151199996   | -8.33000019E-02 | 0.246999994     |
| 9  | -0.131400004   | -0.187999994    | -1.72000006E-02 |
| 10 | 0.323500007    | -0.110399999    | -2.55999994E-02 |
| 11 | 0.2092         | -0.1475         | -0.2744         |
| 12 | 0.2254         | -0.0518         | 0.2642          |
| 13 | 0.1634         | 0.0792          | 0.1799          |
| 14 | -0.2771        | 0.0252          | 0.2505          |
| 15 | 0.2088         | 0.0507          | 0.7211          |
| 16 | -0.1264        | 0.0309          | 0.4103          |

#### Ground energy

-686.916870

#### Excitation energies

6.52860022  
6.69379997  
6.99090004  
7.35790014  
7.42530012  
7.55189991  
7.66109991  
7.79750013  
7.91200018  
7.94110012  
8.0263  
8.0770  
8.0962  
8.1075  
8.2388  
8.3137

Structure B-beta

Number of atoms: 24

|   |          |          |          |
|---|----------|----------|----------|
| 1 | -2.88814 | -1.61132 | 0.44563  |
| 8 | -3.45228 | -0.91317 | 0.08193  |
| 6 | -2.63094 | 0.15194  | -0.36038 |
| 1 | -3.09578 | 1.09294  | -0.05812 |
| 1 | -2.55851 | 0.12561  | -1.45702 |
| 6 | -1.23303 | 0.08129  | 0.22055  |
| 1 | -1.30672 | 0.08627  | 1.32147  |
| 6 | -0.35558 | 1.26686  | -0.19431 |
| 1 | -0.3779  | 1.36353  | -1.28852 |
| 8 | -0.89128 | 2.42557  | 0.41989  |
| 1 | -0.77147 | 3.18554  | -0.16438 |
| 6 | 1.08804  | 1.04491  | 0.2341   |
| 1 | 1.13691  | 1.08797  | 1.33283  |
| 8 | 1.88485  | 2.07499  | -0.31741 |
| 1 | 2.80743  | 1.77665  | -0.2877  |
| 6 | 1.54989  | -0.32711 | -0.23154 |
| 1 | 1.51349  | -0.3758  | -1.32672 |
| 8 | 2.88167  | -0.53894 | 0.2287   |
| 1 | 3.42225  | -0.88853 | -0.49145 |
| 6 | 0.61095  | -1.40552 | 0.29905  |
| 8 | -0.67651 | -1.16179 | -0.20009 |
| 1 | 0.60162  | -1.38945 | 1.40283  |
| 8 | 0.96654  | -2.67211 | -0.16977 |
| 1 | 1.63684  | -3.04401 | 0.42025  |

#### Electric moments

|   |    |                 |                 |                 |             |        |
|---|----|-----------------|-----------------|-----------------|-------------|--------|
| 0 | 0  | 4.30749989      | -6.01999983E-02 | -0.347299993    |             |        |
| 0 | 1  | 5.05999997E-02  | -5.88999987E-02 | 4.14000005E-02  |             |        |
| 0 | 2  | 0.185200006     | 2.30999999E-02  | 4.78000008E-02  |             |        |
| 0 | 3  | -9.08999965E-02 | -1.92000009E-02 | -6.21999986E-02 |             |        |
| 0 | 4  | -2.29000002E-02 | -1.84000004E-02 | -0.251599997    |             |        |
| 0 | 5  | 1.75999999E-02  | 0.222200006     | 0.345200002     |             |        |
| 0 | 6  | -0.161899999    | -0.220100001    | 0.185800001     |             |        |
| 0 | 7  | 9.96999964E-02  | 1.04999999E-02  | -9.18999985E-02 |             |        |
| 0 | 8  | 2.41000000E-02  | 0.106500000     | -0.249200001    |             |        |
| 0 | 9  | 0.185800001     | -7.53000006E-02 | 2.00999994E-02  |             |        |
| 0 | 10 | -0.105800003    | 1.42000001E-02  | -4.14999984E-02 |             |        |
| 0 | 11 | -0.0262         | -0.0323         | 0.3309          | 0.1112      | 0.0218 |
| 0 | 12 | -0.0180         | -0.0341         | 0.0252          | 0.0021      | 0.0004 |
| 0 | 13 | -0.0304         | 0.2526          | -0.2522         | 0.1283      | 0.0255 |
| 0 | 14 | -0.0133         | -0.0298         | -0.0840         | 0.0081      | 0.0016 |
| 0 | 15 | -0.1960         | -0.0366         | -0.1408         | 0.0596      | 0.0119 |
| 0 | 16 | 0.0758          | 0.1291          | -0.0734         | 0.0278      | 0.0056 |
|   | 1  | 1               | -2.88689995     | 2.22650003      | 1.78999996  |        |
|   | 2  | 2               | 3.22239995      | 2.73110008      | -2.44140005 |        |
|   | 3  | 3               | 4.30310011      | -2.84089994     | 1.06309998  |        |
|   | 4  | 4               | 3.59999990      | 2.25169992      | -2.41720009 |        |
|   | 5  | 5               | -0.894999981    | 8.96999985E-02  | 0.493499994 |        |
|   | 6  | 6               | 2.12680006      | 1.50940001      | -1.47730005 |        |
|   | 7  | 7               | 3.48180008      | 1.61020005      | 1.21280003  |        |
|   | 8  | 8               | 2.69799995      | -5.76090002     | 4.43639994  |        |
|   | 9  | 9               | -1.14639997     | 0.532999992     | 2.73620009  |        |
|   | 10 | 10              | 2.15000010      | -1.83570004     | 1.61280000  |        |



|    |    |          |         |         |      |         |
|----|----|----------|---------|---------|------|---------|
| 11 | 11 | 1.8868   | 1.6274  | -3.1638 | Tot= | 4.0272  |
| 12 | 12 | -14.7072 | 2.5612  | 1.0698  | Tot= | 14.9668 |
| 13 | 13 | 0.2300   | 0.6880  | -2.1686 | Tot= | 2.2867  |
| 14 | 14 | -0.3708  | -2.1189 | -1.8544 | Tot= | 2.8401  |
| 15 | 15 | 0.9531   | 1.5450  | 0.7251  | Tot= | 1.9547  |
| 16 | 16 | -2.1025  | 0.3644  | 1.0337  | Tot= | 2.3710  |

#### Magnetic moments

|    |                |                 |                |
|----|----------------|-----------------|----------------|
| 1  | -0.435200006   | 0.217500001     | 0.158199996    |
| 2  | -0.195700005   | -3.09999995E-02 | -0.145699993   |
| 3  | -0.155100003   | 0.590799987     | -0.777100027   |
| 4  | -0.484600008   | 0.518299997     | 8.30999985E-02 |
| 5  | -0.298400015   | 0.198300004     | -0.172999993   |
| 6  | 0.423099995    | 0.250699997     | 0.551800013    |
| 7  | 0.373899996    | -0.234599993    | 0.251300007    |
| 8  | 0.242200002    | 0.191900000     | 9.21000019E-02 |
| 9  | -0.454800010   | 0.248400003     | -0.115500003   |
| 10 | 8.07000026E-02 | -0.178299993    | -0.469099998   |
| 11 | -0.1118        | 0.0806          | 0.6719         |
| 12 | 0.0144         | -0.0487         | -0.0079        |
| 13 | 0.0890         | -0.0291         | -0.1948        |
| 14 | -0.1567        | 0.0815          | -0.1092        |
| 15 | 0.2654         | -0.0942         | 0.2881         |
| 16 | -0.2906        | -0.3396         | -0.6574        |

#### Ground energy

-686.914551

#### Excitation energies

6.53100014  
6.87729979  
7.02899981  
7.09740019  
7.25600004  
7.52710009  
7.66669989  
7.68160009  
7.77610016  
7.85680008  
7.9844  
8.0571  
8.1145  
8.1306  
8.1624  
8.2327

#### Structure C-beta

Numer of atoms: 24

|   |         |          |          |
|---|---------|----------|----------|
| 1 | 4.1763  | -1.03844 | 0.22508  |
| 8 | 3.41699 | -0.823   | -0.33073 |
| 6 | 2.63894 | 0.18581  | 0.29118  |
| 1 | 3.02377 | 1.18448  | 0.0544   |
| 1 | 2.62561 | 0.05829  | 1.38182  |
| 6 | 1.21895 | 0.07847  | -0.21991 |
| 1 | 1.24139 | 0.07074  | -1.32061 |

|   |          |          |          |
|---|----------|----------|----------|
| 6 | 0.33639  | 1.22618  | 0.26987  |
| 1 | 0.34438  | 1.2304   | 1.37058  |
| 8 | 0.83526  | 2.45216  | -0.22671 |
| 1 | 0.19169  | 3.13927  | 0.00773  |
| 6 | -1.08569 | 0.98821  | -0.21139 |
| 1 | -1.09157 | 1.04762  | -1.30786 |
| 8 | -1.91198 | 2.02261  | 0.32437  |
| 1 | -2.53548 | 2.31921  | -0.35155 |
| 6 | -1.59823 | -0.38631 | 0.19873  |
| 1 | -1.65457 | -0.43291 | 1.29656  |
| 8 | -2.86592 | -0.636   | -0.37963 |
| 1 | -3.55456 | -0.28151 | 0.19837  |
| 6 | -0.60853 | -1.45996 | -0.26645 |
| 8 | 0.66723  | -1.13914 | 0.2622   |
| 1 | -0.56458 | -1.49646 | -1.36269 |
| 8 | -0.94442 | -2.73583 | 0.14476  |
| 1 | -1.19076 | -2.72147 | 1.08183  |

#### Electric moments

|    |    |                 |                 |                 |                |         |
|----|----|-----------------|-----------------|-----------------|----------------|---------|
| 0  | 0  | -1.81369996     | 2.95009995      | 2.43729997      |                |         |
| 0  | 1  | -9.65000018E-02 | 2.85999998E-02  | -5.49999997E-03 |                |         |
| 0  | 2  | -0.130199999    | -8.87999982E-02 | 4.14000005E-02  |                |         |
| 0  | 3  | 2.41999999E-02  | 0.145999998     | -0.211199999    |                |         |
| 0  | 4  | 0.151999995     | -3.46000008E-02 | -7.78999999E-02 |                |         |
| 0  | 5  | 0.162900001     | 0.177399993     | 0.227300003     |                |         |
| 0  | 6  | 0.149700001     | -7.66000003E-02 | -4.08000015E-02 |                |         |
| 0  | 7  | 0.204099998     | -4.80000004E-02 | 0.275999993     |                |         |
| 0  | 8  | -5.29000014E-02 | -0.183100000    | -4.00000019E-03 |                |         |
| 0  | 9  | 5.11999987E-02  | 8.11000019E-02  | -0.183100000    |                |         |
| 0  | 10 | 3.04000005E-02  | 8.38999972E-02  | -5.99000007E-02 |                |         |
| 0  | 11 | -0.0320         | -0.0373         | 0.0559          | 0.0055         | 0.0011  |
| 0  | 12 | -0.0834         | 0.1452          | -0.1490         | 0.0503         | 0.0099  |
| 0  | 13 | 0.0460          | 0.1224          | -0.0205         | 0.0175         | 0.0035  |
| 0  | 14 | -0.1127         | -0.0106         | 0.1306          | 0.0299         | 0.0059  |
| 0  | 15 | 0.1379          | 0.1649          | -0.3577         | 0.1742         | 0.0351  |
| 0  | 16 | -0.0644         | -0.0214         | -0.1976         | 0.0436         | 0.0089  |
|    | 1  | 1               | 4.32100010      | -0.469799995    | 2.46309996     |         |
|    | 2  | 2               | -8.05459976     | 4.06780005      | -0.714699984   |         |
|    | 3  | 3               | 2.42219996      | 2.31419992      | 5.27999997E-02 |         |
|    | 4  | 4               | 0.925599992     | -0.711099982    | 0.890200019    |         |
|    | 5  | 5               | 1.51810002      | 1.81540000      | 0.209700003    |         |
|    | 6  | 6               | 7.01070023      | -2.99040008     | 2.39199996     |         |
|    | 7  | 7               | 1.44579995      | 3.83769989      | -1.96019995    |         |
|    | 8  | 8               | 0.424100012     | 2.23930001      | 1.97189999     |         |
|    | 9  | 9               | -1.13820004     | 3.82540011      | 4.45009995     |         |
|    | 10 | 10              | -7.89669991     | 7.94999972E-02  | -1.82009995    |         |
| 11 | 11 | 2.4198          | 0.4318          | -0.2619         | Tot=           | 2.4720  |
| 12 | 12 | 4.8117          | 1.9321          | 1.1962          | Tot=           | 5.3213  |
| 13 | 13 | 9.1492          | -5.8787         | 3.9386          | Tot=           | 11.5664 |
| 14 | 14 | -3.1334         | 1.2481          | 0.8569          | Tot=           | 3.4800  |
| 15 | 15 | 1.4394          | 0.4709          | 2.6302          | Tot=           | 3.0350  |
| 16 | 16 | -6.4290         | 4.7403          | 1.2308          | Tot=           | 8.0819  |

#### Magnetic monents

|    |                 |                 |                |
|----|-----------------|-----------------|----------------|
| 1  | -0.424299985    | 0.242599994     | 0.104300000    |
| 2  | 0.322299987     | 0.167799994     | 0.613399982    |
| 3  | -3.33000012E-02 | -0.129099995    | 0.235799998    |
| 4  | -0.555800021    | -2.96000000E-02 | 2.08999999E-02 |
| 5  | 0.171200007     | 0.402500004     | 0.863499999    |
| 6  | -2.08000001E-02 | -1.31000001E-02 | 0.161100000    |
| 7  | -3.42000015E-02 | -0.204099998    | -0.443599999   |
| 8  | 0.259900004     | -0.225400001    | -0.701399982   |
| 9  | 0.263900012     | 0.152600005     | 6.44999966E-02 |
| 10 | 2.45999992E-02  | -8.34999979E-02 | -0.159899995   |
| 11 | -0.2729         | -0.4646         | -0.5456        |
| 12 | -0.0703         | 0.1457          | 0.4022         |
| 13 | -0.1349         | 0.0352          | -0.3939        |
| 14 | 0.2468          | -0.2602         | -0.3225        |
| 15 | 0.3238          | -0.1936         | -0.0832        |
| 16 | 0.1785          | 0.4825          | 0.1209         |

Ground energy

-686.914185

Excitation energy

6.53910017

6.63290024

6.90450001

7.17360020

7.35270023

7.44619989

7.58419991

7.60260010

7.74289989

7.86730003

7.9736

8.0091

8.0862

8.1158

8.2232

8.2976

Structure D-beta

Number of atoms : 24

|   |          |          |          |
|---|----------|----------|----------|
| 1 | -3.33438 | -1.00951 | 1.09992  |
| 8 | -3.4963  | -0.89882 | 0.15264  |
| 6 | -2.63072 | 0.08983  | -0.37359 |
| 1 | -3.02905 | 1.09529  | -0.19068 |
| 1 | -2.59949 | -0.07883 | -1.45333 |
| 6 | -1.21489 | 0.02445  | 0.17532  |
| 1 | -1.2625  | 0.00151  | 1.28443  |
| 6 | -0.38365 | 1.24938  | -0.23864 |
| 1 | -0.43964 | 1.37547  | -1.32466 |
| 8 | -0.90929 | 2.44625  | 0.30443  |
| 1 | -1.03143 | 2.34355  | 1.26068  |
| 6 | 1.08233  | 1.06299  | 0.14927  |
| 1 | 1.16343  | 1.19619  | 1.23982  |
| 8 | 1.85109  | 2.04126  | -0.52012 |

|   |          |          |          |
|---|----------|----------|----------|
| 1 | 2.57219  | 2.33345  | 0.05202  |
| 6 | 1.61677  | -0.32877 | -0.17204 |
| 1 | 1.7389   | -0.39868 | -1.2636  |
| 8 | 2.86786  | -0.43297 | 0.4881   |
| 1 | 3.44484  | -1.05184 | 0.02166  |
| 6 | 0.65997  | -1.43103 | 0.27638  |
| 8 | -0.61672 | -1.17192 | -0.28196 |
| 1 | 0.59483  | -1.47176 | 1.37168  |
| 8 | 1.05922  | -2.69401 | -0.13563 |
| 1 | 1.35643  | -2.65429 | -1.05778 |

#### Electric moments

|    |    |                 |                 |                 |             |        |
|----|----|-----------------|-----------------|-----------------|-------------|--------|
| 0  | 0  | 2.57489991      | 0.460000008     | 1.63269997      |             |        |
| 0  | 1  | -0.162900001    | 2.22999994E-02  | 0.136199996     |             |        |
| 0  | 2  | 8.38000029E-02  | 8.13999996E-02  | 0.119900003     |             |        |
| 0  | 3  | 1.48999998E-02  | 0.150800005     | -8.48999992E-02 |             |        |
| 0  | 4  | 0.153600007     | -0.104000002    | -0.235400006    |             |        |
| 0  | 5  | -4.16000001E-02 | 4.58000004E-02  | -0.283300012    |             |        |
| 0  | 6  | -4.34000008E-02 | -0.135700002    | 7.60000013E-03  |             |        |
| 0  | 7  | 0.163299993     | 5.27000017E-02  | 0.300799996     |             |        |
| 0  | 8  | -9.95000005E-02 | -8.00999999E-02 | -5.93999997E-02 |             |        |
| 0  | 9  | -0.231800005    | -0.100599997    | 3.83000001E-02  |             |        |
| 0  | 10 | 0.208800003     | -9.45999995E-02 | -7.50999972E-02 |             |        |
| 0  | 11 | 0.0365          | 0.2131          | 0.0185          | 0.0471      | 0.0090 |
| 0  | 12 | 0.0078          | -0.0934         | 0.1102          | 0.0209      | 0.0041 |
| 0  | 13 | 0.0078          | 0.1085          | 0.0233          | 0.0124      | 0.0025 |
| 0  | 14 | 0.1059          | 0.0458          | -0.0900         | 0.0214      | 0.0043 |
| 0  | 15 | -0.0988         | -0.0420         | 0.0145          | 0.0117      | 0.0023 |
| 0  | 16 | 0.0188          | -0.0354         | 0.2657          | 0.0722      | 0.0145 |
|    | 1  | 1               | 2.06890011      | 0.218400002     | -2.51519990 |        |
|    | 2  | 2               | -1.85230005     | 3.39809990      | 3.44160008  |        |
|    | 3  | 3               | 2.87949991      | 7.40000010E-02  | -3.05240011 |        |
|    | 4  | 4               | 0.134499997     | -3.40109992     | -2.90450001 |        |
|    | 5  | 5               | 3.74900007      | 0.637700021     | -2.58929992 |        |
|    | 6  | 6               | 0.130199999     | 1.99290001      | 2.16599989  |        |
|    | 7  | 7               | -2.75889993     | 4.99639988      | 5.38049984  |        |
|    | 8  | 8               | -1.33819997     | 1.22950006      | 4.01809978  |        |
|    | 9  | 9               | -0.543500006    | 0.576300025     | 1.00769997  |        |
|    | 10 | 10              | -0.773299992    | 0.201199993     | 1.97479999  |        |
| 11 | 11 | -1.2443         | 1.5187          | 1.1798          | Tot=        | 2.2906 |
| 12 | 12 | 3.6391          | -1.8365         | -0.0313         | Tot=        | 4.0764 |
| 13 | 13 | 1.4537          | -1.9835         | 1.1390          | Tot=        | 2.7102 |
| 14 | 14 | -0.0184         | -0.3761         | 1.0750          | Tot=        | 1.1391 |
| 15 | 15 | 0.0510          | -2.2825         | -0.8569         | Tot=        | 2.4385 |
| 16 | 16 | 0.4197          | -0.2732         | 0.4721          | Tot=        | 0.6882 |

#### Magnetic moments

|   |                |                 |                |
|---|----------------|-----------------|----------------|
| 1 | 0.289400011    | 0.247299999     | 8.29999987E-03 |
| 2 | 0.127399996    | -0.338600010    | -0.245199993   |
| 3 | 0.303900003    | -0.273699999    | 0.583899975    |
| 4 | 0.321099997    | -3.86999995E-02 | 0.145099998    |
| 5 | 5.99000007E-02 | -0.108199999    | -0.656700015   |
| 6 | 0.494700015    | -9.29000005E-02 | 0.797599971    |
| 7 | 0.290899992    | -6.92000017E-02 | 0.311600000    |

|    |              |                 |              |
|----|--------------|-----------------|--------------|
| 8  | -0.154300004 | -2.30000005E-03 | 0.478500009  |
| 9  | 0.290800005  | 0.271699995     | 0.136000007  |
| 10 | 0.210999995  | 9.97999981E-02  | -0.576399982 |
| 11 | 0.0298       | 0.1955          | 0.0399       |
| 12 | 0.2863       | 0.4854          | -0.2370      |
| 13 | 0.2312       | -0.5288         | 0.1965       |
| 14 | 0.0157       | 0.1236          | 0.2496       |
| 15 | -0.1261      | -0.2080         | -0.2459      |
| 16 | 0.2951       | -0.3088         | -0.0602      |

Ground energy

-686.907166

Excitation energies

6.58300018

6.65199995

6.81669998

6.98579979

7.22030020

7.39890003

7.47700024

7.60249996

7.77330017

7.80410004

7.8409

7.9048

8.0827

8.1024

8.1537

8.2044

Structure E-beta

Number of atoms: 24

|   |          |          |          |
|---|----------|----------|----------|
| 1 | -3.62984 | -0.18827 | 0.98552  |
| 8 | -3.57219 | -0.33685 | 0.03128  |
| 6 | -2.42786 | -1.09932 | -0.27505 |
| 1 | -2.37134 | -1.13648 | -1.36605 |
| 1 | -2.51971 | -2.13171 | 0.09039  |
| 6 | -1.11482 | -0.53357 | 0.26712  |
| 1 | -1.14262 | -0.50287 | 1.36968  |
| 6 | -0.72969 | 0.84905  | -0.25371 |
| 1 | -0.79193 | 0.8368   | -1.35332 |
| 8 | -1.61148 | 1.81477  | 0.27923  |
| 1 | -1.2135  | 2.6856   | 0.11763  |
| 6 | 0.69892  | 1.19094  | 0.17132  |
| 1 | 0.70573  | 1.30162  | 1.26319  |
| 8 | 1.03126  | 2.47737  | -0.33804 |
| 1 | 1.62503  | 2.40097  | -1.09765 |
| 6 | 1.70013  | 0.10376  | -0.18876 |
| 1 | 1.80761  | 0.02528  | -1.28016 |
| 8 | 2.94585  | 0.37041  | 0.43066  |
| 1 | 3.63331  | 0.51636  | -0.22966 |
| 6 | 1.18036  | -1.24516 | 0.29645  |
| 8 | -0.13447 | -1.47161 | -0.17302 |

|   |         |          |          |
|---|---------|----------|----------|
| 1 | 1.18044 | -1.26834 | 1.39936  |
| 8 | 1.99594 | -2.23344 | -0.23225 |
| 1 | 1.63519 | -3.0985  | 0.01399  |

Electric moments

|    |    |                 |                 |                 |               |
|----|----|-----------------|-----------------|-----------------|---------------|
| 0  | 0  | 2.22210002      | -0.983099997    | -0.283399999    |               |
| 0  | 1  | 4.96999994E-02  | -0.157299995    | -0.104699999    |               |
| 0  | 2  | 9.70000029E-02  | 2.64999997E-02  | 9.60000046E-03  |               |
| 0  | 3  | -9.65000018E-02 | 2.62000002E-02  | -0.113600001    |               |
| 0  | 4  | 7.15999976E-02  | -5.88999987E-02 | -0.157299995    |               |
| 0  | 5  | -6.36999980E-02 | -0.118000001    | -0.204400003    |               |
| 0  | 6  | 0.183300003     | 0.128900006     | -0.221100003    |               |
| 0  | 7  | 5.88999987E-02  | -3.68999988E-02 | 0.493000001     |               |
| 0  | 8  | 2.86999997E-02  | -0.272700012    | 0.242500007     |               |
| 0  | 9  | -9.10999998E-02 | -7.84000009E-02 | -8.56000036E-02 |               |
| 0  | 10 | -5.29000014E-02 | 9.84999985E-02  | -1.86000001E-02 |               |
| 0  | 11 | -0.0376         | 0.2330          | -0.0494         | 0.0581 0.0112 |
| 0  | 12 | 0.1409          | 0.0706          | 0.0829          | 0.0317 0.0062 |
| 0  | 13 | -0.1977         | -0.0753         | 0.1618          | 0.0709 0.0139 |
| 0  | 14 | 0.0665          | -0.1550         | 0.1212          | 0.0431 0.0086 |
| 0  | 15 | 0.0958          | -0.0810         | -0.0860         | 0.0231 0.0046 |
| 0  | 16 | 0.0443          | 0.1313          | -0.0513         | 0.0218 0.0044 |
|    | 1  | 1               | -3.58150005     | -3.86910009     | 4.42329979    |
|    | 2  | 2               | 3.29600000      | -1.12769997     | -3.05870008   |
|    | 3  | 3               | -2.22320008     | -2.52789998     | 2.13280010    |
|    | 4  | 4               | 1.49170005      | 6.15430021      | -3.73289990   |
|    | 5  | 5               | 1.50650001      | -4.38819981     | 0.573300004   |
|    | 6  | 6               | -0.926599979    | 0.360300004     | -1.35790002   |
|    | 7  | 7               | 0.660700023     | 0.956700027     | -0.978200018  |
|    | 8  | 8               | -1.66380000     | 0.797900021     | 0.872399986   |
|    | 9  | 9               | -1.39880002     | -0.150000006    | 2.74810004    |
|    | 10 | 10              | 0.766399980     | 0.307000011     | 0.636500001   |
| 11 | 11 | 2.1289          | -1.7725         | 0.1382 Tot=     | 2.7736        |
| 12 | 12 | -6.4505         | -2.3404         | 1.8775 Tot=     | 7.1141        |
| 13 | 13 | -1.3081         | -0.5543         | 0.9327 Tot=     | 1.6995        |
| 14 | 14 | 1.6247          | 2.7046          | 2.3539 Tot=     | 3.9364        |
| 15 | 15 | 1.6909          | -2.2586         | -1.4355 Tot=    | 3.1656        |
| 16 | 16 | 0.4065          | -0.1278         | 0.1414 Tot=     | 0.4490        |

Magnetic moments

|    |                |                 |                 |
|----|----------------|-----------------|-----------------|
| 1  | -0.175899997   | -0.158999994    | 0.372000009     |
| 2  | 0.396400005    | -0.237200007    | 0.349299997     |
| 3  | 7.66000003E-02 | -0.208000004    | -0.469099998    |
| 4  | 0.563799977    | -7.00000003E-02 | -0.264099985    |
| 5  | 0.720600009    | 0.164399996     | -0.148499995    |
| 6  | 5.29000014E-02 | 0.417299986     | 0.403100014     |
| 7  | 0.220599994    | 0.183899999     | 0.478599995     |
| 8  | 0.262899995    | 6.27999976E-02  | -5.77000007E-02 |
| 9  | 6.00000005E-03 | -0.388399988    | 0.247600004     |
| 10 | 3.18000019E-02 | -1.68999992E-02 | -0.769599974    |
| 11 | 0.0474         | 0.1469          | -0.0158         |
| 12 | -0.4949        | 0.0617          | 0.1281          |
| 13 | -0.3848        | -0.1636         | -0.1010         |
| 14 | -0.1383        | 0.1944          | -0.1352         |

|    |         |         |         |
|----|---------|---------|---------|
| 15 | -0.2460 | -0.0568 | 0.1370  |
| 16 | 0.1262  | -0.0778 | -0.1211 |

Ground energy

-686.908813

Excitation energy

6.55070019

6.72760010

6.76469994

7.06669998

7.29640007

7.53039980

7.56400013

7.67180014

7.79330015

7.82000017

7.8548

7.9584

8.0275

8.1047

8.1324

8.1751

Structure F-beta

Number of atoms: 24

|   |          |          |          |
|---|----------|----------|----------|
| 1 | -4.25725 | -0.57146 | 0.11458  |
| 8 | -3.37425 | -0.38107 | 0.45782  |
| 6 | -2.39813 | -1.15295 | -0.24027 |
| 1 | -2.52686 | -1.06328 | -1.32583 |
| 1 | -2.45506 | -2.2103  | 0.04051  |
| 6 | -1.04434 | -0.60653 | 0.17564  |
| 1 | -1.03608 | -0.59077 | 1.28086  |
| 6 | -0.72461 | 0.79884  | -0.34437 |
| 1 | -0.64736 | 0.74393  | -1.4381  |
| 8 | -1.70733 | 1.77613  | -0.04801 |
| 1 | -2.36154 | 1.40669  | 0.56682  |
| 6 | 0.6341   | 1.24402  | 0.19215  |
| 1 | 0.56054  | 1.34619  | 1.28946  |
| 8 | 1.02864  | 2.46576  | -0.38876 |
| 1 | 0.48267  | 3.17086  | -0.01103 |
| 6 | 1.67982  | 0.18958  | -0.15314 |
| 1 | 1.8437   | 0.19845  | -1.23412 |
| 8 | 2.95381  | 0.44257  | 0.4181   |
| 1 | 2.87022  | 0.5067   | 1.38221  |
| 6 | 1.21626  | -1.21927 | 0.23476  |
| 8 | -0.05532 | -1.50408 | -0.28996 |
| 1 | 1.17512  | -1.30776 | 1.33966  |
| 8 | 2.05741  | -2.18903 | -0.30384 |
| 1 | 2.94962  | -2.03348 | 0.04349  |

Electric moments

|   |   |                |                 |                |
|---|---|----------------|-----------------|----------------|
| 0 | 0 | -2.83209991    | -0.828800023    | 3.02839994     |
| 0 | 1 | 6.53000027E-02 | -5.18000014E-02 | 0.226199999    |
| 0 | 2 | 3.62000018E-02 | 7.15999976E-02  | 9.73000005E-02 |

|    |    |                 |                 |                 |                |        |
|----|----|-----------------|-----------------|-----------------|----------------|--------|
| 0  | 3  | 7.77999982E-02  | 8.47999975E-02  | -9.43000019E-02 |                |        |
| 0  | 4  | -7.06000030E-02 | 0.101499997     | 0.100900002     |                |        |
| 0  | 5  | -7.76000023E-02 | -8.20000023E-02 | 0.212699994     |                |        |
| 0  | 6  | -5.22000007E-02 | 4.61999997E-02  | 0.157900006     |                |        |
| 0  | 7  | 7.98000023E-02  | -7.31000006E-02 | 0.176400006     |                |        |
| 0  | 8  | -8.91000032E-02 | -0.165199995    | -0.335999995    |                |        |
| 0  | 9  | -0.210099995    | 9.51000005E-02  | 0.261299998     |                |        |
| 0  | 10 | -1.72000006E-02 | -2.70000007E-03 | 0.102600001     |                |        |
| 0  | 11 | 0.0805          | 0.1977          | -0.1610         | 0.0715         | 0.0139 |
| 0  | 12 | -0.0569         | -0.2952         | 0.0548          | 0.0934         | 0.0183 |
| 0  | 13 | 0.2430          | 0.0847          | 0.2983          | 0.1552         | 0.0306 |
| 0  | 14 | 0.1391          | 0.0406          | 0.2838          | 0.1015         | 0.0203 |
| 0  | 15 | -0.1087         | -0.1274         | -0.0159         | 0.0283         | 0.0057 |
| 0  | 16 | -0.0627         | 0.1005          | -0.1409         | 0.0339         | 0.0069 |
|    | 1  | 1               | -6.70389986     | -0.749499977    | -2.75390005    |        |
|    | 2  | 2               | 0.589600027     | -2.29229999     | 0.894599974    |        |
|    | 3  | 3               | -0.680199981    | -0.574699998    | 0.992299974    |        |
|    | 4  | 4               | -2.34870005     | 0.238000005     | 0.178900003    |        |
|    | 5  | 5               | -5.18629980     | -0.233500004    | 0.524900019    |        |
|    | 6  | 6               | 4.60000010E-03  | 0.799799979     | 9.70000029E-03 |        |
|    | 7  | 7               | 5.00920010      | -1.03120005     | 2.44600010     |        |
|    | 8  | 8               | 3.02519989      | 3.72000001E-02  | 0.739000022    |        |
|    | 9  | 9               | -4.97770023     | 2.09969997      | 0.112999998    |        |
|    | 10 | 10              | -1.05060005     | 2.08240008      | 3.02270007     |        |
| 11 | 11 | -1.0384         | -0.5755         | 2.8007          | Tot=           | 3.0419 |
| 12 | 12 | -1.6833         | 1.0547          | 2.5453          | Tot=           | 3.2287 |
| 13 | 13 | -3.6109         | -1.0654         | -0.8406         | Tot=           | 3.8575 |
| 14 | 14 | -1.1535         | -2.2737         | 2.0241          | Tot=           | 3.2553 |
| 15 | 15 | -1.6123         | -0.3142         | 3.4917          | Tot=           | 3.8588 |
| 16 | 16 | 2.2958          | -1.9154         | 2.0072          | Tot=           | 3.6011 |

#### Magnetic moments

|    |                |                |                 |
|----|----------------|----------------|-----------------|
| 1  | -0.273400009   | 4.38000001E-02 | 0.209600002     |
| 2  | 8.08999985E-02 | -0.225600004   | 0.507300019     |
| 3  | 0.216499999    | 0.550499976    | 0.409999996     |
| 4  | 4.16000001E-02 | -0.107500002   | -0.388999999    |
| 5  | 0.392300010    | 0.214499995    | 0.252000004     |
| 6  | 0.218500003    | 0.438699991    | -0.217399999    |
| 7  | -0.323799998   | -0.134000003   | 0.290499985     |
| 8  | 0.656199992    | 0.150500000    | -3.06000002E-02 |
| 9  | 0.443399996    | 0.290300012    | -0.363499999    |
| 10 | 0.462599993    | -0.308800012   | -0.613799989    |
| 11 | 0.0343         | -0.3151        | 0.3152          |
| 12 | 0.0657         | -0.0001        | 0.1363          |
| 13 | -0.3586        | -0.4668        | 0.1282          |
| 14 | 0.2426         | 0.4268         | 0.5301          |
| 15 | 0.2522         | -0.1302        | -0.0760         |
| 16 | 0.1107         | -0.1954        | 0.0936          |

#### Ground energy

-686.911133

#### Excitation energy

6.55649996

6.68820000



6.87039995  
 7.11369991  
 7.24590015  
 7.32929993  
 7.40040016  
 7.50339985  
 7.69670010  
 7.74779987  
 7.9574  
 7.9941  
 8.0378  
 8.1635  
 8.1969  
 8.2712

# Structure G-beta

Numer of atoms 24

|   |          |          |          |
|---|----------|----------|----------|
| 1 | -3.27138 | 0.5061   | 0.01696  |
| 8 | -3.50779 | -0.42642 | 0.14681  |
| 6 | -2.38733 | -1.24123 | -0.12019 |
| 1 | -2.32691 | -1.48393 | -1.19163 |
| 1 | -2.52316 | -2.17842 | 0.42449  |
| 6 | -1.04761 | -0.62643 | 0.28906  |
| 1 | -1.01128 | -0.54837 | 1.38859  |
| 6 | -0.7643  | 0.76007  | -0.29893 |
| 1 | -0.76499 | 0.6899   | -1.39565 |
| 8 | -1.76465 | 1.67622  | 0.12255  |
| 1 | -1.46364 | 2.57432  | -0.08289 |
| 6 | 0.618    | 1.21294  | 0.17002  |
| 1 | 0.58386  | 1.28404  | 1.27019  |
| 8 | 0.9498   | 2.48426  | -0.37241 |
| 1 | 0.76987  | 3.1843   | 0.26833  |
| 6 | 1.66735  | 0.18464  | -0.22398 |
| 1 | 1.76593  | 0.15149  | -1.31235 |
| 8 | 2.96009  | 0.48612  | 0.27085  |
| 1 | 2.89942  | 0.80353  | 1.18424  |
| 6 | 1.24626  | -1.21298 | 0.25316  |
| 8 | -0.05199 | -1.52325 | -0.17188 |
| 1 | 1.29418  | -1.25257 | 1.35907  |
| 8 | 2.0587   | -2.19414 | -0.30984 |
| 1 | 2.90059  | -2.21471 | 0.16711  |

# Electric moments

|   |   |                 |                 |                 |
|---|---|-----------------|-----------------|-----------------|
| 0 | 0 | 2.23090005      | 3.47189999      | 3.14569998      |
| 0 | 1 | 3.59999994E-03  | 5.79000004E-02  | 0.272799999     |
| 0 | 2 | -0.162900001    | 0.104699999     | -6.37999997E-02 |
| 0 | 3 | -9.79000032E-02 | 3.04000005E-02  | -0.144099995    |
| 0 | 4 | -4.19000015E-02 | 8.10000021E-03  | 2.43999995E-02  |
| 0 | 5 | 0.140499994     | 0.102600001     | 0.223900005     |
| 0 | 6 | -0.175300002    | -0.142000005    | 0.203700006     |
| 0 | 7 | -0.125400007    | 0.146599993     | -0.139500007    |
| 0 | 8 | -3.04000005E-02 | 0.199699998     | 0.245800003     |
| 0 | 9 | -0.160099998    | -6.71999976E-02 | -0.300700009    |

|    |    |              |                |                |                 |
|----|----|--------------|----------------|----------------|-----------------|
| 0  | 10 | -0.141000003 | 8.91000032E-02 | 1.35000004E-02 |                 |
| 0  | 11 | 0.0480       | 0.0196         | -0.1619        | 0.0289 0.0056   |
| 0  | 12 | 0.0818       | -0.1468        | 0.1146         | 0.0414 0.0080   |
| 0  | 13 | 0.2644       | 0.0087         | 0.0638         | 0.0740 0.0146   |
| 0  | 14 | 0.0586       | -0.2050        | -0.2839        | 0.1261 0.0250   |
| 0  | 15 | -0.0203      | 0.0935         | 0.1320         | 0.0266 0.0053   |
| 0  | 16 | -0.0171      | -0.1395        | 0.3208         | 0.1227 0.0247   |
|    | 1  | 1            | -0.282599986   | -0.489399999   | -2.06900001     |
|    | 2  | 2            | 1.16869998     | -2.26690006    | -0.117399998    |
|    | 3  | 3            | 0.183400005    | -3.72259998    | 2.15350008      |
|    | 4  | 4            | 0.798900008    | -1.02330005    | 1.12730002      |
|    | 5  | 5            | -0.426200002   | 5.73999994E-02 | 0.125300005     |
|    | 6  | 6            | 1.28320003     | 1.38290000     | 1.20599997      |
|    | 7  | 7            | 0.442699999    | -2.00550008    | 0.496300012     |
|    | 8  | 8            | -3.20140004    | -2.35619998    | -4.34000008E-02 |
|    | 9  | 9            | -0.762099981   | 3.08629990     | -0.887099981    |
|    | 10 | 10           | -1.73969996    | 2.44840002     | -1.32369995     |
| 11 | 11 | 1.8441       | -1.9728        | 0.6675         | Tot= 2.7817     |
| 12 | 12 | -0.5171      | 2.8591         | 0.2999         | Tot= 2.9209     |
| 13 | 13 | 0.2707       | -0.9815        | 0.0516         | Tot= 1.0194     |
| 14 | 14 | -2.0504      | 2.3165         | 3.9850         | Tot= 5.0448     |
| 15 | 15 | 2.3182       | -0.4826        | 2.4949         | Tot= 3.4397     |
| 16 | 16 | -1.2268      | 1.7333         | 3.8022         | Tot= 4.3550     |

#### Magnetic moments

|    |                |                 |                 |
|----|----------------|-----------------|-----------------|
| 1  | -0.239999995   | -2.84000002E-02 | 1.75999999E-02  |
| 2  | 8.35999995E-02 | -0.442299992    | -0.240899995    |
| 3  | 0.220500007    | 0.400200009     | -6.43000007E-02 |
| 4  | 9.48999971E-02 | -0.256099999    | 0.151600003     |
| 5  | -0.192100003   | 9.60000008E-02  | 6.34000003E-02  |
| 6  | 0.409099996    | 0.490000010     | 0.131400004     |
| 7  | 0.159299999    | -4.65000011E-02 | -1.01300001     |
| 8  | 0.297600001    | 8.20999965E-02  | -0.263999999    |
| 9  | 0.398799986    | 0.555499971     | -0.109999999    |
| 10 | 0.232199997    | 6.76999986E-02  | -0.136299998    |
| 11 | -0.7003        | -0.0343         | 0.4523          |
| 12 | -0.3574        | -0.0573         | 0.2048          |
| 13 | -0.1022        | -0.2423         | 0.4111          |
| 14 | -0.2178        | 0.5478          | -0.0389         |
| 15 | 0.0563         | 0.0856          | 0.0379          |
| 16 | 0.2458         | -0.0046         | 0.3389          |

#### Ground energy

-686.908386

#### Excitation energy

6.45230007  
6.57000017  
6.89010000  
7.00339985  
7.27069998  
7.29969978  
7.40570021  
7.43889999  
7.60580015

7.63950014  
7.8845  
7.9111  
8.0361  
8.0898  
8.1802  
8.2244

#### Structure H-beta

Number of atoms: 24

|   |          |          |          |
|---|----------|----------|----------|
| 1 | -4.31513 | -0.73695 | 0.16055  |
| 8 | -3.3699  | -0.9098  | 0.26262  |
| 6 | -2.63702 | 0.19478  | -0.24409 |
| 1 | -3.03995 | 1.14968  | 0.10984  |
| 1 | -2.64696 | 0.19081  | -1.34322 |
| 6 | -1.20644 | 0.07975  | 0.23284  |
| 1 | -1.19991 | 0.05153  | 1.33476  |
| 6 | -0.33368 | 1.23583  | -0.27317 |
| 1 | -0.36905 | 1.23369  | -1.36993 |
| 8 | -0.84465 | 2.49115  | 0.13576  |
| 1 | -0.38361 | 2.79451  | 0.93117  |
| 6 | 1.11186  | 1.02884  | 0.18953  |
| 1 | 1.13539  | 1.12096  | 1.28554  |
| 8 | 1.96206  | 2.05764  | -0.27128 |
| 1 | 2.28975  | 1.84631  | -1.15753 |
| 6 | 1.62113  | -0.36973 | -0.15494 |
| 1 | 1.75608  | -0.44732 | -1.24415 |
| 8 | 2.84148  | -0.58684 | 0.52483  |
| 1 | 3.46846  | -1.03585 | -0.05574 |
| 6 | 0.60328  | -1.43833 | 0.23412  |
| 8 | -0.67166 | -1.13163 | -0.2823  |
| 1 | 0.54444  | -1.51355 | 1.3332   |
| 8 | 1.01945  | -2.63918 | -0.32939 |
| 1 | 0.31147  | -3.29139 | -0.21215 |

#### Electric dipoles

|   |    |                 |                 |                 |        |        |
|---|----|-----------------|-----------------|-----------------|--------|--------|
| 0 | 0  | -0.935400009    | -0.327199996    | -0.812399983    |        |        |
| 0 | 1  | -3.37999985E-02 | -3.31999995E-02 | -0.116599999    |        |        |
| 0 | 2  | 1.90999992E-02  | 7.85000026E-02  | 0.188500002     |        |        |
| 0 | 3  | 0.157900006     | -1.44999996E-02 | -4.08000015E-02 |        |        |
| 0 | 4  | -4.19999985E-03 | -0.116899997    | 0.267899990     |        |        |
| 0 | 5  | 3.11999992E-02  | -4.41000015E-02 | -0.209299996    |        |        |
| 0 | 6  | -2.92000007E-02 | 0.123000003     | -0.294900000    |        |        |
| 0 | 7  | -5.66999987E-02 | 8.81000012E-02  | 0.200700000     |        |        |
| 0 | 8  | -0.109700002    | -0.127599999    | 0.210999995     |        |        |
| 0 | 9  | 0.217899993     | 0.173600003     | -5.05000018E-02 |        |        |
| 0 | 10 | 5.57000004E-02  | 0.180800006     | 0.172399998     |        |        |
| 0 | 11 | 0.0232          | 0.0453          | -0.0514         | 0.0052 | 0.0010 |
| 0 | 12 | -0.0729         | 0.1491          | -0.3909         | 0.1804 | 0.0354 |
| 0 | 13 | 0.0509          | -0.0685         | 0.0180          | 0.0076 | 0.0015 |
| 0 | 14 | -0.1435         | -0.0539         | -0.0437         | 0.0254 | 0.0051 |
| 0 | 15 | -0.1067         | -0.0101         | 0.1717          | 0.0410 | 0.0083 |
| 0 | 16 | 0.1618          | 0.0770          | -0.0721         | 0.0373 | 0.0075 |

|       |         |              |                |              |
|-------|---------|--------------|----------------|--------------|
| 1     | 1       | 5.90660000   | -0.808399975   | -0.250999987 |
| 2     | 2       | -7.38019991  | -0.498299986   | 3.73790002   |
| 3     | 3       | -5.15990019  | 5.92000000E-02 | 3.53839993   |
| 4     | 4       | -2.11330009  | -4.89419985    | -5.14540005  |
| 5     | 5       | -0.175699994 | 5.86639977     | -2.56940007  |
| 6     | 6       | -0.763800025 | -0.274500012   | 3.10260010   |
| 7     | 7       | 0.189500004  | -4.32530022    | -4.88880014  |
| 8     | 8       | 8.51109982   | 1.59619999     | -1.29960001  |
| 9     | 9       | -2.17960000  | -1.76419997    | -2.56340003  |
| 10    | 10      | -0.853999972 | -0.821799994   | 1.12170005   |
| 11 11 | -1.4705 | 1.8414       | -0.5525 Tot=   | 2.4204       |
| 12 12 | -5.0484 | -1.9405      | -0.9566 Tot=   | 5.4925       |
| 13 13 | -3.8534 | 0.4323       | 1.5641 Tot=    | 4.1811       |
| 14 14 | -3.2916 | -0.2605      | 0.0846 Tot=    | 3.3030       |
| 15 15 | 0.2330  | -1.8398      | 0.8736 Tot=    | 2.0500       |
| 16 16 | 4.2883  | -1.6473      | -0.6043 Tot=   | 4.6334       |

#### Magnetic moments

|    |                |                 |                 |
|----|----------------|-----------------|-----------------|
| 1  | -0.395399988   | 0.563199997     | -0.358500004    |
| 2  | 0.333099991    | -0.172900006    | -0.289600015    |
| 3  | 5.68999983E-02 | 0.339199990     | 0.301099986     |
| 4  | -0.301499993   | 0.202000007     | -0.203999996    |
| 5  | 0.360100001    | -0.345800012    | -0.382699996    |
| 6  | -0.567799985   | -7.00000022E-03 | -0.709500015    |
| 7  | -0.263099998   | -0.158099994    | -0.109600000    |
| 8  | 0.165600002    | 0.207399994     | -5.77999987E-02 |
| 9  | 0.269699991    | 0.290699989     | 0.120200001     |
| 10 | -0.458299994   | -0.268999994    | -0.279300004    |
| 11 | -0.3657        | -0.1481         | 0.2937          |
| 12 | -0.3195        | 0.4795          | -0.0289         |
| 13 | -0.2311        | 0.5159          | 0.1243          |
| 14 | -0.0843        | -0.1362         | -0.1317         |
| 15 | 0.1462         | 0.1308          | -0.3932         |
| 16 | -0.0123        | -0.4558         | -0.0745         |

#### Ground energy

-686.909546

#### Excitation energies

6.65280008  
6.72030020  
6.95889997  
7.01859999  
7.07940006  
7.39709997  
7.59870005  
7.63549995  
7.81759977  
7.89519978  
7.9611  
8.0167  
8.0322  
8.1402  
8.2274  
8.2504

## Structure I-beta

Number of atoms: 24

|   |          |          |          |
|---|----------|----------|----------|
| 1 | 2.01017  | -1.15414 | 1.46561  |
| 8 | 2.85111  | -0.87362 | 1.07386  |
| 6 | 2.63812  | -0.61627 | -0.30222 |
| 1 | 2.91896  | -1.49924 | -0.89125 |
| 1 | 3.27686  | 0.22157  | -0.59155 |
| 6 | 1.19131  | -0.27684 | -0.62027 |
| 1 | 1.07729  | -0.18984 | -1.71134 |
| 6 | 0.70402  | 1.01351  | 0.03871  |
| 1 | 0.90799  | 0.95389  | 1.11883  |
| 8 | 1.42489  | 2.08475  | -0.53285 |
| 1 | 1.08587  | 2.90733  | -0.14598 |
| 6 | -0.79604 | 1.21217  | -0.1697  |
| 1 | -0.98204 | 1.37893  | -1.23722 |
| 8 | -1.21301 | 2.41011  | 0.46846  |
| 1 | -1.49419 | 2.222    | 1.37583  |
| 6 | -1.553   | -0.02584 | 0.27802  |
| 1 | -1.43395 | -0.16128 | 1.36423  |
| 8 | -2.91999 | 0.10273  | -0.06211 |
| 1 | -3.455   | -0.38224 | 0.58049  |
| 6 | -0.9597  | -1.26842 | -0.39026 |
| 8 | 0.41532  | -1.37134 | -0.12793 |
| 1 | -1.12991 | -1.207   | -1.47766 |
| 8 | -1.55198 | -2.41961 | 0.13606  |
| 1 | -2.18105 | -2.78393 | -0.49965 |

## Electric moments

|   |    |         |         |         |        |        |
|---|----|---------|---------|---------|--------|--------|
|   | 0  | 0       | -3.5738 | -0.6952 | 0.0590 |        |
| 0 | 1  | 0.1226  | 0.0697  | -0.0088 |        |        |
| 0 | 2  | -0.0485 | -0.0082 | -0.1031 |        |        |
| 0 | 3  | 0.1724  | -0.0524 | 0.2543  |        |        |
| 0 | 4  | -0.0507 | 0.2185  | 0.0486  |        |        |
| 0 | 5  | 0.2003  | -0.1275 | 0.1610  |        |        |
| 0 | 6  | 0.0724  | -0.0261 | -0.1806 |        |        |
| 0 | 7  | 0.0457  | 0.2589  | 0.2701  |        |        |
| 0 | 8  | 0.0399  | -0.0124 | 0.0242  |        |        |
| 0 | 9  | -0.2442 | 0.2243  | 0.3434  |        |        |
| 0 | 10 | 0.2232  | -0.0379 | 0.0837  |        |        |
| 0 | 11 | -0.0123 | -0.1977 | 0.3588  | 0.1679 | 0.0325 |
| 0 | 12 | 0.0418  | -0.0001 | 0.1759  | 0.0327 | 0.0064 |
| 0 | 13 | 0.0184  | 0.0172  | 0.0128  | 0.0008 | 0.0002 |
| 0 | 14 | 0.0905  | 0.1954  | 0.0007  | 0.0464 | 0.0092 |
| 0 | 15 | 0.0554  | 0.0621  | -0.0589 | 0.0104 | 0.0021 |
| 0 | 16 | 0.1845  | -0.0335 | 0.0781  | 0.0413 | 0.0083 |
| 1 | 1  | 2.7954  | 1.6324  | -2.5168 |        |        |
| 2 | 2  | -0.8764 | -2.6507 | -5.0286 |        |        |
| 3 | 3  | -0.8448 | 1.6352  | 1.5639  |        |        |
| 4 | 4  | -0.9014 | -0.7572 | -4.2577 |        |        |
| 5 | 5  | -2.5055 | -3.9624 | -2.0718 |        |        |
| 6 | 6  | -1.1725 | 1.0540  | 3.0876  |        |        |
| 7 | 7  | -1.1252 | -0.2122 | -0.3808 |        |        |

|       |         |         |         |      |        |
|-------|---------|---------|---------|------|--------|
| 8 8   | -2.4310 | 2.4185  | 0.3046  |      |        |
| 9 8   | -2.3898 | -0.9685 | 1.0763  |      |        |
| 10 10 | 3.6999  | 3.2659  | -0.2157 |      |        |
| 11 11 | -2.7610 | -4.8578 | -1.0707 | Tot= | 5.6893 |
| 12 12 | 6.8788  | 1.7031  | 0.9743  | Tot= | 7.1532 |
| 13 13 | 3.4922  | -0.4857 | 2.2734  | Tot= | 4.1951 |
| 14 14 | 5.6361  | 1.5318  | -0.9529 | Tot= | 5.9178 |
| 15 15 | -2.3813 | 3.3151  | -0.1082 | Tot= | 4.0831 |
| 16 16 | 0.7503  | 1.3856  | -1.4207 | Tot= | 2.1216 |

#### Magnetic moments

|    |         |         |         |
|----|---------|---------|---------|
| 1  | -0.3942 | -0.1726 | 0.1635  |
| 2  | 0.0162  | 0.3829  | -0.2490 |
| 3  | -0.1224 | -0.1334 | -0.2130 |
| 4  | 0.6016  | 0.2109  | -0.3561 |
| 5  | -0.5917 | 0.2084  | 0.4015  |
| 6  | -0.2116 | 0.4537  | -0.7566 |
| 7  | 0.3853  | -0.3446 | 0.4637  |
| 8  | 0.4190  | 0.1405  | -0.2443 |
| 9  | 0.0229  | 0.2812  | 0.0274  |
| 10 | -0.2001 | -0.1638 | 0.5161  |
| 11 | -0.2847 | 0.1846  | -0.3264 |
| 12 | -0.1210 | -0.0116 | -0.3761 |
| 13 | 0.2078  | 0.2902  | 0.0690  |
| 14 | -0.0435 | 0.0106  | 0.3901  |
| 15 | 0.1255  | -0.4070 | 0.2181  |
| 16 | -0.3292 | 0.4224  | -0.2089 |

#### Ground energy

-686.913747333

#### Excitation energies

6.6989  
6.8369  
6.9332  
7.1430  
7.3650  
7.5693  
7.5975  
7.6623  
7.7318  
7.8570  
7.8984  
7.9707  
8.0070  
8.0765  
8.1480  
8.2153

#### Structure L-beta

Numer of atoms: 24

|   |         |          |          |
|---|---------|----------|----------|
| 1 | 3.75242 | -0.48807 | 1.21293  |
| 8 | 2.85902 | -0.80313 | 1.02767  |
| 6 | 2.59645 | -0.68849 | -0.36284 |
| 1 | 2.82076 | -1.63788 | -0.86498 |

|   |          |          |          |
|---|----------|----------|----------|
| 1 | 3.19017  | 0.10964  | -0.82082 |
| 6 | 1.13459  | -0.35854 | -0.58574 |
| 1 | 0.97759  | -0.28848 | -1.67582 |
| 6 | 0.72578  | 0.97147  | 0.04475  |
| 1 | 0.95845  | 0.92086  | 1.11796  |
| 8 | 1.46925  | 2.00689  | -0.57064 |
| 1 | 1.06342  | 2.85067  | -0.31596 |
| 6 | -0.7678  | 1.19607  | -0.14679 |
| 1 | -0.95714 | 1.36584  | -1.21293 |
| 8 | -1.17305 | 2.41358  | 0.48358  |
| 1 | -1.35301 | 2.24696  | 1.42197  |
| 6 | -1.58086 | -0.00624 | 0.30035  |
| 1 | -1.52378 | -0.13649 | 1.39173  |
| 8 | -2.93034 | 0.07399  | -0.13032 |
| 1 | -3.35972 | 0.84307  | 0.27078  |
| 6 | -1.01829 | -1.27957 | -0.33757 |
| 8 | 0.34464  | -1.40901 | -0.05446 |
| 1 | -1.17667 | -1.22781 | -1.43007 |
| 8 | -1.62191 | -2.41698 | 0.19543  |
| 1 | -2.51261 | -2.48922 | -0.17792 |

# Electric moments

|    |    |                 |                 |                 |                |        |
|----|----|-----------------|-----------------|-----------------|----------------|--------|
| 0  | 0  | -0.478700012    | 2.53850007      | 7.49999983E-03  |                |        |
| 0  | 1  | 3.26999985E-02  | -4.80999984E-02 | 7.24000037E-02  |                |        |
| 0  | 2  | 0.108099997     | -0.138200000    | -1.33999996E-02 |                |        |
| 0  | 3  | -5.31999990E-02 | 0.101300001     | 0.241200000     |                |        |
| 0  | 4  | -0.121799998    | 8.91000032E-02  | -0.130300000    |                |        |
| 0  | 5  | 2.30999999E-02  | -0.187500000    | -2.89999996E-03 |                |        |
| 0  | 6  | 0.327399999     | 7.63000026E-02  | 0.182300001     |                |        |
| 0  | 7  | -4.91999984E-02 | 0.127299994     | -0.286799997    |                |        |
| 0  | 8  | 0.132300004     | 6.62000030E-02  | -0.146400005    |                |        |
| 0  | 9  | 6.80000009E-03  | 5.40000014E-03  | 0.162200004     |                |        |
| 0  | 10 | 0.142800003     | -0.130500004    | -0.143199995    |                |        |
| 0  | 11 | 0.0374          | -0.2320         | -0.2075         | 0.0983         | 0.0191 |
| 0  | 12 | 0.0972          | -0.0849         | -0.2422         | 0.0753         | 0.0148 |
| 0  | 13 | -0.1356         | 0.0292          | 0.2430          | 0.0783         | 0.0155 |
| 0  | 14 | -0.1240         | 0.1062          | -0.1098         | 0.0387         | 0.0077 |
| 0  | 15 | 0.0113          | -0.2252         | 0.1234          | 0.0661         | 0.0132 |
| 0  | 16 | 0.0077          | -0.0171         | -0.1286         | 0.0169         | 0.0034 |
|    | 1  | 1               | 3.36490011      | -0.585399985    | -4.55670023    |        |
|    | 2  | 2               | -6.95060015     | 1.46190000      | -1.39660001    |        |
|    | 3  | 3               | 4.50129986      | -3.47079992     | -4.55929995    |        |
|    | 4  | 4               | 4.45839977      | 6.25050020      | 3.69330001     |        |
|    | 5  | 5               | 1.43760002      | -1.40030003     | -2.52340007    |        |
|    | 6  | 6               | 1.80209994      | -1.29260004     | -2.85780001    |        |
|    | 7  | 7               | -2.69429994     | 1.53970003      | 3.78049994     |        |
|    | 8  | 8               | 2.43470001      | 1.14269996      | 0.711000025    |        |
|    | 9  | 9               | -3.90899992     | 0.370900005     | -2.76220012    |        |
|    | 10 | 10              | 2.94589996      | 0.243599996     | 3.29999998E-02 |        |
| 11 | 11 | -0.5324         | -1.0242         | -0.4369         | Tot=           | 1.2342 |
| 12 | 12 | -0.5092         | 1.6315          | -0.9209         | Tot=           | 1.9414 |
| 13 | 13 | -0.6990         | 2.5132          | -0.4400         | Tot=           | 2.6455 |
| 14 | 14 | 1.5993          | 0.0043          | -1.9312         | Tot=           | 2.5074 |

|    |    |        |        |         |      |        |
|----|----|--------|--------|---------|------|--------|
| 15 | 15 | 0.4621 | 0.5944 | -0.1513 | Tot= | 0.7679 |
| 16 | 16 | 4.4124 | 2.9995 | 0.2734  | Tot= | 5.3423 |

Magnetic moments

|    |                |                 |                 |
|----|----------------|-----------------|-----------------|
| 1  | 9.22999978E-02 | -0.478700012    | 0.129600003     |
| 2  | -0.472999990   | -0.170300007    | 0.398299992     |
| 3  | 0.259000003    | -5.79000004E-02 | -4.58000004E-02 |
| 4  | 0.410299987    | -6.92000017E-02 | 0.151400000     |
| 5  | -0.440800011   | 2.05000006E-02  | -0.256999999    |
| 6  | -0.238800004   | 0.195099995     | 0.754400015     |
| 7  | 0.191599995    | 0.300099999     | -0.117399998    |
| 8  | 0.239999995    | -0.472999990    | -0.117899999    |
| 9  | 0.482699990    | -0.535600007    | 0.151700005     |
| 10 | -0.382699996   | -0.316100001    | 0.490500003     |
| 11 | 0.0967         | -0.1434         | -0.0999         |
| 12 | -0.1254        | -0.5080         | 0.5180          |
| 13 | 0.1144         | -0.3297         | -0.5135         |
| 14 | 0.3617         | -0.0333         | -0.0326         |
| 15 | -0.2656        | -0.3287         | -0.1876         |
| 16 | -0.1890        | -0.2585         | -0.0726         |

Ground energy

-686.912781

Excitation energies

6.63110018  
6.75180006  
6.95539999  
7.04920006  
7.17439985  
7.32740021  
7.59420013  
7.63180017  
7.74940014  
7.82490015  
7.9265  
8.0130  
8.0812  
8.0979  
8.1479  
8.2420

Structure M-beta

Number of atoms: 24

|   |          |          |          |
|---|----------|----------|----------|
| 8 | 0.33161  | -1.41254 | -0.1097  |
| 6 | 1.12673  | -0.34809 | -0.60831 |
| 6 | 0.71218  | 0.96036  | 0.0621   |
| 6 | -0.77921 | 1.21414  | -0.14358 |
| 6 | -1.59869 | 0.00664  | 0.27244  |
| 6 | -1.04708 | -1.27256 | -0.36794 |
| 6 | 2.58325  | -0.69356 | -0.3825  |
| 8 | 2.82613  | -0.77259 | 1.01393  |
| 8 | 1.47718  | 2.01288  | -0.51457 |
| 8 | -1.20874 | 2.33916  | 0.60584  |
| 8 | -2.93222 | 0.21035  | -0.14361 |



|   |          |          |          |
|---|----------|----------|----------|
| 8 | -1.68964 | -2.4065  | 0.12426  |
| 1 | 3.75811  | -0.97747 | 1.16494  |
| 1 | 2.78924  | -1.65585 | -0.8684  |
| 1 | 3.19466  | 0.08768  | -0.84871 |
| 1 | 0.97762  | -0.25288 | -1.69705 |
| 1 | 0.92262  | 0.87978  | 1.13409  |
| 1 | 1.56082  | 2.72833  | 0.12987  |
| 1 | -0.9566  | 1.39242  | -1.21449 |
| 1 | -0.97192 | 3.1433   | 0.12423  |
| 1 | -1.53807 | -0.09579 | 1.36712  |
| 1 | -3.50194 | -0.42739 | 0.30913  |
| 1 | -1.24527 | -1.2569  | -1.44811 |
| 1 | -1.40693 | -2.53292 | 1.04493  |

#### Electric moments

|    |    |                 |                 |                 |              |        |
|----|----|-----------------|-----------------|-----------------|--------------|--------|
| 0  | 0  | 2.75679994      | 0.881299973     | 0.435200006     |              |        |
| 0  | 1  | -6.36000037E-02 | -0.163000003    | -1.95000004E-02 |              |        |
| 0  | 2  | -2.45999992E-02 | -0.114200003    | -1.30000003E-02 |              |        |
| 0  | 3  | 3.06000002E-02  | 9.83999968E-02  | -0.170000002    |              |        |
| 0  | 4  | 0.257200003     | -4.06000018E-02 | 0.145999998     |              |        |
| 0  | 5  | 1.16999997E-02  | -3.70999984E-02 | 0.192399994     |              |        |
| 0  | 6  | -0.104000002    | 4.28000018E-02  | 0.228100002     |              |        |
| 0  | 7  | -0.224299997    | 0.202900007     | 0.105899997     |              |        |
| 0  | 8  | -2.39000004E-02 | 0.102899998     | 0.358000010     |              |        |
| 0  | 9  | 3.70999984E-02  | -6.41999990E-02 | 0.258300006     |              |        |
| 0  | 10 | -0.267100006    | 1.74000002E-02  | -0.316199988    |              |        |
| 0  | 11 | 0.1408          | -0.3039         | 0.0930          | 0.1208       | 0.0236 |
| 0  | 12 | -0.0290         | 0.1600          | 0.0182          | 0.0268       | 0.0053 |
| 0  | 13 | 0.1468          | 0.0508          | -0.0638         | 0.0282       | 0.0056 |
| 0  | 14 | -0.0356         | -0.0242         | 0.0212          | 0.0023       | 0.0005 |
| 0  | 15 | 0.0133          | 0.1570          | 0.0250          | 0.0254       | 0.0051 |
|    | 1  | 1               | 1.16069996      | -5.94280005     | -0.169799998 |        |
|    | 2  | 2               | -3.85190010     | 2.17659998      | -0.718299985 |        |
|    | 3  | 3               | 7.56829977      | 3.88409996      | -4.50089979  |        |
|    | 4  | 4               | 1.59360003      | -3.36279988     | 1.14069998   |        |
|    | 5  | 5               | -1.62520003     | 2.63969994      | 5.25309992   |        |
|    | 6  | 6               | 3.56570005      | -1.26839995     | -1.51820004  |        |
|    | 7  | 7               | -3.96160007     | -5.57350016     | -2.20009995  |        |
|    | 8  | 8               | 2.53660011      | 1.99140000      | -2.69449997  |        |
|    | 9  | 9               | 0.668200016     | 2.91930008      | 1.12849998   |        |
|    | 10 | 10              | 4.77010012      | -0.631900012    | -1.34230006  |        |
| 11 | 11 | 3.9230          | -1.0552         | 1.7379          | Tot=         | 4.4186 |
| 12 | 12 | 2.6306          | -2.1540         | 1.8831          | Tot=         | 3.8867 |
| 13 | 13 | 1.0141          | -0.4850         | 0.7136          | Tot=         | 1.3315 |
| 14 | 14 | -3.2371         | 0.5905          | -0.0715         | Tot=         | 3.2912 |
| 15 | 15 | 3.4093          | 4.9077          | -1.9359         | Tot=         | 6.2815 |

#### Magnetic moments

|   |                 |              |                |
|---|-----------------|--------------|----------------|
| 1 | 0.126699999     | 0.330900013  | 1.60000008E-02 |
| 2 | -0.535600007    | 0.127399996  | 0.423900008    |
| 3 | -0.342299998    | -0.153699994 | 0.127200007    |
| 4 | -0.274399996    | -0.225999996 | 0.702199996    |
| 5 | -4.54999991E-02 | -0.209000006 | -0.485000014   |
| 6 | 0.380800009     | -0.361900002 | 9.69000012E-02 |

|    |              |              |                 |
|----|--------------|--------------|-----------------|
| 7  | 0.334600002  | -0.393999994 | -0.132400006    |
| 8  | 0.157600001  | -0.188999996 | 0.858600020     |
| 9  | -0.429199994 | -0.201499999 | -1.20999999E-02 |
| 10 | 0.134900004  | -0.220200002 | 0.246299997     |
| 11 | -0.3924      | -0.1690      | 0.5282          |
| 12 | -0.1067      | -0.0892      | -0.3008         |
| 13 | -0.0199      | -0.0715      | -0.3726         |
| 14 | 0.2486       | 0.0896       | -0.2095         |
| 15 | 0.0059       | 0.0812       | 0.3421          |

Ground energies

-686.915222

Excitation energies

6.61899982

6.68550014

6.78919983

7.21280003

7.29180002

7.33750010

7.52720022

7.65910006

7.74329996

7.90719986

7.9729

8.0239

8.0831

8.1406

8.1532

## D-galactose

Structure A-alpha

Number of atoms : 24

|   |          |          |          |
|---|----------|----------|----------|
| 1 | -4.25772 | -0.13224 | -0.35469 |
| 8 | -3.33559 | -0.16198 | -0.64017 |
| 6 | -2.57542 | 0.65188  | 0.23164  |
| 1 | -2.64765 | 0.31059  | 1.27096  |
| 1 | -2.8803  | 1.70658  | 0.18515  |
| 6 | -1.12511 | 0.5377   | -0.19862 |
| 1 | -1.01515 | 0.97384  | -1.19994 |
| 6 | -0.65306 | -0.91787 | -0.27348 |
| 1 | -1.16535 | -1.40263 | -1.10974 |
| 8 | -0.98055 | -1.62095 | 0.91041  |
| 1 | -0.16008 | -1.87924 | 1.35069  |
| 6 | 0.85509  | -0.92533 | -0.51906 |
| 1 | 1.03086  | -0.55431 | -1.54021 |
| 8 | 1.31869  | -2.25478 | -0.37578 |
| 1 | 2.26632  | -2.23934 | -0.57856 |
| 6 | 1.60975  | -0.01706 | 0.45132  |
| 1 | 1.55148  | -0.43296 | 1.46037  |
| 8 | 2.98505  | 0.0389   | 0.12673  |

|   |          |         |          |
|---|----------|---------|----------|
| 1 | 3.0345   | 0.42651 | -0.76203 |
| 6 | 0.99213  | 1.37663 | 0.47084  |
| 8 | -0.37962 | 1.31599 | 0.73682  |
| 1 | 1.42107  | 1.97844 | 1.2788   |
| 8 | 1.28494  | 1.94791 | -0.78574 |
| 1 | 1.05851  | 2.88837 | -0.75466 |

#### Electric moments

|    |    |                 |                 |                 |
|----|----|-----------------|-----------------|-----------------|
| 0  | 0  | 0.274899989     | 3.36190009      | -0.648899972    |
| 0  | 1  | -0.107100002    | 2.38000005E-02  | -2.48000007E-02 |
| 0  | 2  | -7.02999979E-02 | -4.50999998E-02 | 9.92999971E-02  |
| 0  | 3  | -3.72000001E-02 | 1.72000006E-02  | -0.123700000    |
| 0  | 4  | 5.90999983E-02  | 0.150700003     | 4.50999998E-02  |
| 0  | 5  | 7.94000030E-02  | 9.48000029E-02  | 0.149399996     |
| 0  | 6  | -5.07999994E-02 | -0.367000014    | -0.284999996    |
| 0  | 7  | 0.158999994     | -7.24000037E-02 | -7.71000013E-02 |
| 0  | 8  | 0.121900000     | 6.52000010E-02  | -3.75999995E-02 |
| 0  | 9  | 0.261799991     | -7.69999996E-03 | 0.146500006     |
| 0  | 10 | 2.09999997E-02  | 2.59000007E-02  | -0.226099998    |
| 0  | 11 | -6.67999983E-02 | -0.174099997    | -6.31000027E-02 |
| 0  | 12 | 4.10000002E-03  | 6.44999966E-02  | -0.138500005    |
| 0  | 13 | 1.73000004E-02  | 1.35000004E-02  | 1.53999999E-02  |
| 0  | 14 | -6.09999988E-03 | 0.240700006     | -0.234799996    |
| 0  | 15 | 1.62000004E-02  | 3.48999985E-02  | 0.127200007     |
| 0  | 16 | 0.136600003     | 0.255100012     | -0.111100003    |
| 1  | 1  | 2.24659991      | 2.00920010      | 0.132799998     |
| 2  | 2  | 0.886600018     | 1.77610004      | 0.642899990     |
| 3  | 3  | -2.68339992     | -0.663900018    | -4.17999998E-02 |
| 4  | 4  | -1.41970003     | 4.45639992      | -3.96359992     |
| 5  | 5  | -0.969200015    | 2.46749997      | 0.359200001     |
| 6  | 6  | -2.62639999     | 2.74099994      | 1.69620001      |
| 7  | 7  | 1.72230005      | -2.94289994     | 0.225600004     |
| 8  | 8  | 5.90030003      | 1.40330005      | -2.01889992     |
| 9  | 9  | -2.46309996     | -1.82729995     | 0.730700016     |
| 10 | 10 | -1.28090000     | 0.166500002     | -0.191499993    |
| 11 | 11 | -5.09940004     | -4.51580000     | 1.14779997      |
| 12 | 12 | -1.78919995     | 0.227899998     | -0.489100009    |
| 13 | 13 | -1.53960001     | 5.99999987E-02  | 1.09440005      |
| 14 | 14 | -1.62269998     | 1.21930003      | -1.93840003     |
| 15 | 15 | 0.494300008     | -1.80960000     | -0.820900023    |
| 16 | 16 | -4.29899979     | 3.69449997      | 2.30259991      |

#### Magnetic moments

|    |                |                 |                 |
|----|----------------|-----------------|-----------------|
| 1  | -0.393999994   | 0.378800005     | 5.62000014E-02  |
| 2  | 0.103799999    | -8.51999968E-02 | -0.680400014    |
| 3  | -0.326099992   | -7.42999986E-02 | 0.172199994     |
| 4  | 0.238100007    | -0.328000009    | 0.272799999     |
| 5  | -0.268900007   | -0.269100010    | -0.176300004    |
| 6  | -0.542400002   | -0.466899991    | 0.491299987     |
| 7  | -0.499199986   | 0.405800015     | 0.131200001     |
| 8  | -0.493299991   | 7.00000022E-03  | -0.137999997    |
| 9  | 0.539499998    | 8.20999965E-02  | 0.255400002     |
| 10 | 8.56999978E-02 | -5.68999983E-02 | -4.41999994E-02 |
| 11 | -0.315299988   | -0.143399999    | -0.669900000    |

|    |                 |              |                |
|----|-----------------|--------------|----------------|
| 12 | -0.241899997    | -0.110600002 | -0.174999997   |
| 13 | -0.315200001    | 0.461400002  | 0.100199997    |
| 14 | -8.88999999E-02 | 0.391900003  | 0.517400026    |
| 15 | 1.44999996E-02  | -0.193000004 | 2.11999994E-02 |
| 16 | -3.90000008E-02 | 0.163100004  | 0.235100001    |

Ground energy

-686.918701

Excitation energies

6.70289993

6.70919991

7.00150013

7.18069983

7.35290003

7.54949999

7.65329981

7.70310020

7.79820013

7.84240007

7.92749977

8.08520031

8.11789989

8.21560001

8.25189972

8.31130028

B.alpha

Number of atoms: 24

|   |          |          |          |
|---|----------|----------|----------|
| 1 | 3.10312  | 0.94187  | -0.72548 |
| 8 | 3.50647  | 0.09988  | -0.47664 |
| 6 | 2.57731  | -0.6352  | 0.29332  |
| 1 | 2.56787  | -0.30091 | 1.33755  |
| 1 | 2.89671  | -1.67912 | 0.26887  |
| 6 | 1.14668  | -0.54956 | -0.23074 |
| 1 | 1.09417  | -0.97984 | -1.2387  |
| 6 | 0.62091  | 0.89012  | -0.31016 |
| 1 | 1.0846   | 1.37291  | -1.18978 |
| 8 | 0.95184  | 1.61786  | 0.85319  |
| 1 | 0.16225  | 2.12054  | 1.10976  |
| 6 | -0.89268 | 0.87636  | -0.52097 |
| 1 | -1.11387 | 0.49365  | -1.52459 |
| 8 | -1.45561 | 2.17543  | -0.34507 |
| 1 | -0.99042 | 2.79746  | -0.92494 |
| 6 | -1.57952 | -0.02214 | 0.4882   |
| 1 | -1.38785 | 0.36734  | 1.49768  |
| 8 | -2.96888 | -0.1106  | 0.25168  |
| 1 | -3.24167 | 0.7162   | -0.17327 |
| 6 | -0.97696 | -1.42076 | 0.40141  |
| 8 | 0.38823  | -1.35099 | 0.66964  |
| 1 | -1.40583 | -2.06707 | 1.17492  |
| 8 | -1.18085 | -1.96622 | -0.882   |
| 1 | -2.07303 | -2.33869 | -0.90473 |

Electric moments

|    |    |                 |                 |                 |
|----|----|-----------------|-----------------|-----------------|
| 0  | 0  | -2.98379993     | 2.15520000      | -1.79310000     |
| 0  | 1  | 7.54999965E-02  | 0.141000003     | 6.57000020E-02  |
| 0  | 2  | 6.00000005E-03  | 5.79999993E-03  | 0.229599997     |
| 0  | 3  | -0.100900002    | 0.177000001     | -0.240300000    |
| 0  | 4  | -1.99999995E-04 | -3.17000002E-02 | 9.99999978E-03  |
| 0  | 5  | -0.171299994    | 7.40000010E-02  | 0.255100012     |
| 0  | 6  | 0.170100003     | 0.247899994     | -0.264899999    |
| 0  | 7  | 0.116999999     | -5.31999990E-02 | -0.144800007    |
| 0  | 8  | 4.03999984E-02  | 5.00000007E-02  | 2.12999992E-02  |
| 0  | 9  | 4.83000018E-02  | -5.07999994E-02 | 0.125599995     |
| 0  | 10 | 7.64999986E-02  | 0.186600000     | 8.54000002E-02  |
| 0  | 11 | 6.70000017E-02  | -2.67999992E-02 | -1.32999998E-02 |
| 0  | 12 | 0.137500003     | 0.147599995     | -0.148200005    |
| 0  | 13 | -6.44000024E-02 | -7.05000013E-02 | -0.211099997    |
| 0  | 14 | -2.25000009E-02 | 0.142299995     | 0.243799999     |
| 0  | 15 | -0.126699999    | -4.65999991E-02 | 0.197200000     |
| 0  | 16 | -0.150000006    | 5.40000014E-02  | -0.106700003    |
| 1  | 1  | -2.06979990     | -3.71620011     | 1.88479996      |
| 2  | 2  | -1.96770000     | -4.11040020     | 1.96389997      |
| 3  | 3  | -1.81560004     | -3.66849995     | 2.23320007      |
| 4  | 4  | 7.72999972E-02  | 2.31850004      | -3.03000007E-02 |
| 5  | 5  | 0.123400003     | 1.70829999      | 0.182400003     |
| 6  | 6  | -1.44480002     | -1.27769995     | -1.79310000     |
| 7  | 7  | -2.20619988     | -1.93219995     | 0.518899977     |
| 8  | 8  | 1.43519998      | -3.08540010     | 1.93770003      |
| 9  | 9  | 0.749700010     | 0.377799988     | -0.203400001    |
| 10 | 10 | -1.12520003     | -2.21679997     | 0.334800005     |
| 11 | 11 | -0.226699993    | 1.11389995      | -1.58260000     |
| 12 | 12 | -2.16599989     | -1.97479999     | -1.12349999     |
| 13 | 13 | -1.35730004     | 0.695699990     | -2.92740011     |
| 14 | 14 | -2.24040008     | 2.28360009      | -0.388099998    |
| 15 | 15 | -0.715799987    | 1.10270000      | 1.11510003      |
| 16 | 16 | -1.23060000     | 1.07260001      | 1.57630002      |

#### Magnetic moments

|    |                 |                 |              |
|----|-----------------|-----------------|--------------|
| 1  | -0.426699996    | 0.463400006     | -0.171399996 |
| 2  | 0.218099996     | 0.407400012     | -0.253600001 |
| 3  | 0.333400011     | -7.97000006E-02 | -0.405499995 |
| 4  | 0.559499979     | -0.378399998    | -0.150800005 |
| 5  | -0.174199998    | -0.256900012    | 0.239199996  |
| 6  | 0.177900001     | -0.322800010    | 0.290199995  |
| 7  | 0.297300011     | 0.323700011     | -0.304300010 |
| 8  | -0.137600005    | -0.143399999    | -0.118500002 |
| 9  | 0.314500004     | -0.584699988    | -0.259499997 |
| 10 | 0.434700012     | -0.513100028    | -0.259600013 |
| 11 | 0.356599987     | 0.500500023     | -0.221399993 |
| 12 | -3.77000012E-02 | -0.236200005    | 0.501399994  |
| 13 | -0.488700002    | -0.243200004    | -0.219899997 |
| 14 | -0.102799997    | 4.90000006E-03  | 0.288100004  |
| 15 | -6.62000030E-02 | 0.151199996     | -0.188199997 |
| 16 | -0.222299993    | -0.501100004    | -0.168899998 |

#### Ground energy

-686.913208

# Excitation energies

6.80079985  
6.93510008  
7.04160023  
7.22940016  
7.34159994  
7.64709997  
7.73699999  
7.77750015  
7.82180023  
7.88539982  
7.99529982  
8.03499985  
8.07310009  
8.17980003  
8.20139980  
8.22140026

## C-Alpha

Number of atoms: 24

|   |          |          |          |
|---|----------|----------|----------|
| 1 | 3.48558  | 1.01057  | -0.22845 |
| 8 | 3.40415  | 0.16606  | -0.69267 |
| 6 | 2.60007  | -0.68005 | 0.10423  |
| 1 | 2.72943  | -0.48049 | 1.17394  |
| 1 | 2.91369  | -1.71046 | -0.08017 |
| 6 | 1.12725  | -0.53299 | -0.26094 |
| 1 | 0.94724  | -0.94959 | -1.25749 |
| 6 | 0.6483   | 0.91396  | -0.21079 |
| 1 | 1.17004  | 1.52     | -0.95404 |
| 8 | 0.93472  | 1.49353  | 1.0593   |
| 1 | 0.747    | 0.8047   | 1.7182   |
| 6 | -0.84662 | 0.93816  | -0.49412 |
| 1 | -0.99164 | 0.57815  | -1.5198  |
| 8 | -1.40021 | 2.24002  | -0.48614 |
| 1 | -1.39955 | 2.54452  | 0.43547  |
| 6 | -1.62315 | 0.01293  | 0.43857  |
| 1 | -1.59856 | 0.42869  | 1.45801  |
| 8 | -2.95737 | -0.10995 | -0.01221 |
| 1 | -3.18199 | 0.74199  | -0.42257 |
| 6 | -0.9864  | -1.38395 | 0.48229  |
| 8 | 0.39836  | -1.27739 | 0.71907  |
| 1 | -1.36218 | -1.94979 | 1.34161  |
| 8 | -1.25727 | -2.08177 | -0.69488 |
| 1 | -1.95466 | -1.59069 | -1.15996 |

## Electric moments

|   |   |              |                 |                 |
|---|---|--------------|-----------------|-----------------|
| 0 | 0 | -0.982599974 | 1.56429994      | 1.48319995      |
| 0 | 1 | 0.152400002  | -1.75999999E-02 | 4.12999988E-02  |
| 0 | 2 | -0.192900002 | 1.68999992E-02  | -4.67000008E-02 |
| 0 | 3 | -0.165700004 | -7.11999983E-02 | -0.125200003    |
| 0 | 4 | 0.127000004  | 0.130199999     | -1.15999999E-02 |
| 0 | 5 | 0.112099998  | 6.06999993E-02  | -0.197200000    |
| 0 | 6 | 0.179600000  | 0.133900002     | -0.126200005    |

|    |    |                 |                 |                 |
|----|----|-----------------|-----------------|-----------------|
| 0  | 7  | -0.307700008    | -2.62000002E-02 | 0.209199995     |
| 0  | 8  | -7.85000026E-02 | 4.47999984E-02  | 5.27999997E-02  |
| 0  | 9  | 0.178900003     | -7.33999982E-02 | 0.468600005     |
| 0  | 10 | 7.60000013E-03  | -0.282200009    | 0.113899998     |
| 0  | 11 | -3.20000015E-02 | 1.76999997E-02  | 0.137899995     |
| 0  | 12 | 0.202099994     | -0.198300004    | -0.193599999    |
| 0  | 13 | 5.02999984E-02  | -0.112700000    | 8.79999995E-02  |
| 0  | 14 | -0.172199994    | 0.245399997     | 0.119999997     |
| 0  | 15 | 9.20000002E-02  | 4.43000011E-02  | 9.30000022E-02  |
| 0  | 16 | 0.108700000     | 0.234300002     | 1.37000000E-02  |
| 1  | 1  | 0.269499987     | -1.71010005     | -2.22639990     |
| 2  | 2  | -2.93219995     | -2.17319989     | -7.55999982E-02 |
| 3  | 3  | 1.31110001      | 0.214399993     | -0.452699989    |
| 4  | 4  | 1.90149999      | -0.328799993    | 1.67030001      |
| 5  | 5  | 4.30000015E-02  | -3.83000001E-02 | 2.22889996      |
| 6  | 6  | -7.90000036E-02 | 0.218099996     | 4.16069984      |
| 7  | 7  | 1.62769997      | -0.370700002    | -0.908800006    |
| 8  | 8  | 2.42379999      | -1.12199998     | 0.640799999     |
| 9  | 9  | 2.56150007      | 7.18000010E-02  | -2.69580007     |
| 10 | 10 | -1.00230002     | 1.04380000      | 2.89310002      |
| 11 | 11 | -2.56410003     | 0.605700016     | 2.35560012      |
| 12 | 12 | -1.09000001E-02 | 1.14110005      | -1.52590001     |
| 13 | 13 | -3.55559993     | 3.37360001      | 0.305700004     |
| 14 | 14 | -0.169200003    | 2.69000006      | 1.82040000      |
| 15 | 15 | 1.90100002      | 2.03609991      | 1.49790001      |
| 16 | 16 | -0.499599993    | -0.454200000    | -1.13460004     |

#### Magnetic moments

|    |                 |                |                 |
|----|-----------------|----------------|-----------------|
| 1  | -5.20999990E-02 | -0.131600007   | -7.46999979E-02 |
| 2  | 0.108700000     | -0.359200001   | -0.592199981    |
| 3  | -0.243799999    | 0.607599974    | -0.547399998    |
| 4  | 0.172700003     | 0.364600003    | -0.356799990    |
| 5  | -0.380199999    | -0.424100012   | 0.126100004     |
| 6  | -0.230700001    | 0.399699986    | -2.83000004E-02 |
| 7  | -6.53000027E-02 | -0.289700001   | -0.459899992    |
| 8  | -0.502499998    | 0.206100002    | -0.426699996    |
| 9  | 0.272199988     | 8.72000009E-02 | 0.249799997     |
| 10 | -0.308800012    | 1.49999997E-02 | 7.90000036E-02  |
| 11 | 9.71999988E-02  | 6.03000000E-02 | -9.04999971E-02 |
| 12 | -1.75999999E-02 | 0.769400001    | 0.307000011     |
| 13 | -0.140599996    | 0.100500003    | 9.32999998E-02  |
| 14 | -6.44000024E-02 | 0.519800007    | -0.181700006    |
| 15 | -0.118199997    | -0.120999999   | -0.119300000    |
| 16 | -0.261599988    | -0.182999998   | 0.138999999     |

#### Ground energy

-686.919922

#### Excitation energy

6.91459990  
7.11460018  
7.26590014  
7.51149988  
7.63509989  
7.66930008

7.83279991  
7.97310019  
8.06369972  
8.13239956  
8.16800022  
8.24050045  
8.38980007  
8.42780018  
8.47630024  
8.49409962

#### D-Alpha

Number of atoms: 24

|   |          |          |          |
|---|----------|----------|----------|
| 1 | -3.19106 | 0.74285  | 1.12144  |
| 8 | -3.52586 | -0.07032 | 0.71872  |
| 6 | -2.62636 | -0.47724 | -0.295   |
| 1 | -2.73606 | 0.12784  | -1.20233 |
| 1 | -2.87691 | -1.51242 | -0.53499 |
| 6 | -1.17718 | -0.43658 | 0.16906  |
| 1 | -1.10526 | -0.90446 | 1.15688  |
| 6 | -0.5657  | 0.96314  | 0.20106  |
| 1 | -1.04387 | 1.56691  | 0.98045  |
| 8 | -0.82129 | 1.66632  | -1.00942 |
| 1 | -0.22569 | 1.32943  | -1.69387 |
| 6 | 0.92937  | 0.91315  | 0.52565  |
| 1 | 1.04376  | 0.50486  | 1.5335   |
| 8 | 1.48586  | 2.20355  | 0.58112  |
| 1 | 1.41502  | 2.59571  | -0.30195 |
| 6 | 1.65534  | -0.03331 | -0.42919 |
| 1 | 1.68491  | 0.39027  | -1.4459  |
| 8 | 2.97331  | -0.22828 | 0.05646  |
| 1 | 3.34605  | -1.01402 | -0.37344 |
| 6 | 0.90904  | -1.38132 | -0.47031 |
| 8 | -0.4391  | -1.2189  | -0.78131 |
| 1 | 1.30388  | -2.01188 | -1.28062 |
| 8 | 1.04834  | -2.02802 | 0.76723  |
| 1 | 1.86807  | -1.69694 | 1.1709   |

#### Electric moments

|   |    |                 |                 |                 |
|---|----|-----------------|-----------------|-----------------|
| 0 | 0  | 3.07380009      | -0.365599990    | -1.98080003     |
| 0 | 1  | 6.56000003E-02  | 5.95000014E-02  | 0.152300000     |
| 0 | 2  | 8.26999992E-02  | -9.49999988E-02 | 0.103900000     |
| 0 | 3  | -7.54000023E-02 | 7.09000006E-02  | -0.138999999    |
| 0 | 4  | -6.91000000E-02 | -7.40000000E-03 | -0.107900001    |
| 0 | 5  | -0.183799997    | 3.90000008E-02  | 5.20000011E-02  |
| 0 | 6  | 0.213799998     | -1.30000000E-03 | -0.313499987    |
| 0 | 7  | 0.318100005     | -7.20999986E-02 | -0.295800000    |
| 0 | 8  | -7.94999972E-02 | 0.402700007     | -9.60000046E-03 |
| 0 | 9  | 1.60000008E-02  | 3.88999991E-02  | -0.184900001    |
| 0 | 10 | 9.91000012E-02  | -0.101400003    | -1.46000003E-02 |
| 0 | 11 | -9.13000032E-02 | 0.108400002     | -1.43999998E-02 |
| 0 | 12 | -4.01000008E-02 | 0.188899994     | 0.158800006     |
| 0 | 13 | -1.55999996E-02 | -0.178499997    | 9.25000012E-02  |



|    |    |                 |                 |                |
|----|----|-----------------|-----------------|----------------|
| 0  | 14 | 0.138099998     | -0.176799998    | 0.194000006    |
| 0  | 15 | 3.70999984E-02  | 5.38000017E-02  | 0.111699998    |
| 0  | 16 | -2.95000002E-02 | -8.03000033E-02 | 5.31000011E-02 |
| 1  | 1  | -0.839699984    | -1.73329997     | 3.47390008     |
| 2  | 2  | 2.06080008      | -2.94819999     | -3.45070004    |
| 3  | 3  | -1.25059998     | 1.20000001E-02  | -0.376700014   |
| 4  | 4  | 0.994499981     | -2.75950003     | 3.29380012     |
| 5  | 5  | -1.85759997     | 3.20790005      | -0.536599994   |
| 6  | 6  | 3.36260009      | -1.13049996     | -4.67549992    |
| 7  | 7  | 2.50020003      | -1.21229994     | -1.66779995    |
| 8  | 8  | 2.77080011      | -0.255499989    | -1.20630002    |
| 9  | 9  | -3.10170007     | -1.53830004     | 2.89750004     |
| 10 | 10 | -5.64930010     | 3.62240005      | 0.856199980    |
| 11 | 11 | 1.93250000      | -0.457800001    | -1.54620004    |
| 12 | 12 | 8.69000033E-02  | -2.28080010     | 1.67530000     |
| 13 | 13 | 2.61960006      | -0.269600004    | -1.80460000    |
| 14 | 14 | -1.24030006     | 3.14280009      | 0.848399997    |
| 15 | 15 | 1.52470005      | -0.583500028    | -2.32850003    |
| 16 | 16 | 2.61649990      | 0.999800026     | 0.918399990    |

#### Magnetic moments

|    |                 |                 |                 |
|----|-----------------|-----------------|-----------------|
| 1  | -0.144099995    | 9.52999964E-02  | -0.171299994    |
| 2  | -0.315600008    | -0.273799986    | -0.104000002    |
| 3  | 0.188199997     | 0.630599976     | 0.474299997     |
| 4  | -0.324299991    | -2.16000006E-02 | -0.538500011    |
| 5  | -6.23000003E-02 | 0.415399998     | 0.175699994     |
| 6  | -8.39999989E-02 | -0.127900004    | -8.10000021E-03 |
| 7  | -0.460200012    | -0.107199997    | 0.550000012     |
| 8  | -0.196700007    | -8.89999978E-03 | -5.10000018E-03 |
| 9  | -1.62000004E-02 | 0.639599979     | 0.218400002     |
| 10 | -1.32999998E-02 | 0.154300004     | -0.199399993    |
| 11 | -0.666999996    | -0.354099989    | -0.381599993    |
| 12 | -9.62999985E-02 | 5.33000007E-02  | 7.16999993E-02  |
| 13 | 0.282700002     | 8.57999995E-02  | -8.70999992E-02 |
| 14 | 0.153400004     | 1.39999995E-03  | 0.386500001     |
| 15 | 0.265899986     | 0.366400003     | 2.36000009E-02  |
| 16 | 3.35000008E-02  | -0.371499985    | 0.160799995     |

#### Ground energy

-686.905090

#### Excitation energy

6.79430008  
6.87050009  
6.91039991  
7.10680008  
7.41249990  
7.52199984  
7.61590004  
7.83500004  
7.86089993  
7.87069988  
7.94339991  
7.98769999  
8.13319969

8.19349957  
8.30249977  
8.33290005

## E-Alpha

Number of atoms: 24

|   |          |          |          |
|---|----------|----------|----------|
| 1 | 3.29334  | -0.30728 | -1.45475 |
| 8 | 3.49309  | 0.08436  | -0.59242 |
| 6 | 2.60553  | -0.47467 | 0.35809  |
| 1 | 2.68158  | 0.13224  | 1.25996  |
| 1 | 2.87555  | -1.51009 | 0.6072   |
| 6 | 1.16999  | -0.47125 | -0.14604 |
| 1 | 1.1353   | -0.93223 | -1.14378 |
| 6 | 0.57762  | 0.92999  | -0.2505  |
| 1 | 1.10527  | 1.46024  | -1.05294 |
| 8 | 0.76327  | 1.60734  | 0.98664  |
| 1 | 0.73423  | 2.5535   | 0.7908   |
| 6 | -0.91896 | 0.88743  | -0.5746  |
| 1 | -1.07519 | 0.49156  | -1.5813  |
| 8 | -1.44868 | 2.20154  | -0.56947 |
| 1 | -1.72657 | 2.40182  | 0.33529  |
| 6 | -1.61033 | -0.02595 | 0.42378  |
| 1 | -1.52245 | 0.4162   | 1.42657  |
| 8 | -2.97058 | -0.17514 | 0.04276  |
| 1 | -3.42737 | -0.65737 | 0.74778  |
| 6 | -0.9218  | -1.39673 | 0.43553  |
| 8 | 0.42425  | -1.28259 | 0.76052  |
| 1 | -1.36    | -2.03855 | 1.21379  |
| 8 | -1.03113 | -1.99898 | -0.83359 |
| 1 | -1.96777 | -2.19518 | -0.98172 |

## Electric moments

|   |    |                 |                 |                 |
|---|----|-----------------|-----------------|-----------------|
| 0 | 0  | -2.61129999     | -1.01030004     | 0.853799999     |
| 0 | 1  | 4.69999984E-02  | 0.109999999     | -0.129700005    |
| 0 | 2  | -9.73000005E-02 | 8.42000023E-02  | 5.68999983E-02  |
| 0 | 3  | -8.70999992E-02 | 4.43000011E-02  | -4.85999994E-02 |
| 0 | 4  | 0.116200000     | -9.01999995E-02 | -0.105200000    |
| 0 | 5  | 0.185399994     | -0.100699998    | 0.140499994     |
| 0 | 6  | -0.160300002    | -6.23999983E-02 | 0.251100004     |
| 0 | 7  | 1.43999998E-02  | -0.223299995    | 7.40000010E-02  |
| 0 | 8  | 0.386700004     | 0.150600001     | -6.97000027E-02 |
| 0 | 9  | -0.292499989    | -0.273799986    | 0.245700002     |
| 0 | 10 | 0.123999998     | -7.32000023E-02 | -0.161899999    |
| 0 | 11 | 8.60000029E-02  | 9.60000008E-02  | 0.141000003     |
| 0 | 12 | 8.16000029E-02  | -0.105099998    | -9.67999995E-02 |
| 0 | 13 | -5.55999987E-02 | 2.42999997E-02  | 0.184599996     |
| 0 | 14 | 0.139300004     | -0.275799990    | -7.47999996E-02 |
| 0 | 15 | 1.72000006E-02  | -7.84000009E-02 | 0.124100000     |
| 0 | 16 | -2.00999994E-02 | 0.209900007     | 4.19999985E-03  |
| 1 | 1  | 4.05700016      | 1.52980006      | -2.90319991     |
| 2 | 2  | -2.00990009     | -5.27549982     | -0.439399987    |
| 3 | 3  | -2.96600008     | -0.426200002    | 4.31689978      |

|    |    |              |              |              |
|----|----|--------------|--------------|--------------|
| 4  | 4  | 0.358200014  | 1.13220000   | 0.804400027  |
| 5  | 5  | 0.816999972  | -1.84759998  | -1.36039996  |
| 6  | 6  | -1.46159995  | 1.17429996   | 1.01820004   |
| 7  | 7  | -0.845399976 | -3.11540008  | -0.549600005 |
| 8  | 8  | 2.43400002   | 1.29709995   | -2.47679996  |
| 9  | 9  | -0.465700001 | -2.70560002  | -0.108900003 |
| 10 | 10 | 1.65090001   | 1.71120000   | -1.71889997  |
| 11 | 11 | 0.883199990  | 2.98070002   | 0.459500015  |
| 12 | 12 | -4.06739998  | -1.79929996  | 2.95910001   |
| 13 | 13 | 1.18589997   | -2.67750001  | -2.50830007  |
| 14 | 14 | -2.38470006  | -0.635800004 | 2.41240001   |
| 15 | 15 | -1.00549996  | -0.523800015 | 1.53849995   |
| 16 | 16 | 2.75359988   | 0.766900003  | -1.12189996  |

#### Magnetic moments

|    |                 |                 |                |
|----|-----------------|-----------------|----------------|
| 1  | 6.76999986E-02  | -0.102600001    | 0.483900011    |
| 2  | -0.329899997    | 4.98000011E-02  | 1.37000000E-02 |
| 3  | -0.300300002    | -0.455100000    | -0.410299987   |
| 4  | 0.208000004     | 0.230299994     | -0.331600010   |
| 5  | 0.375000000     | -0.294400007    | 0.263399988    |
| 6  | 0.259200007     | -0.294600010    | 0.564899981    |
| 7  | -0.254500002    | 0.126499996     | 0.290199995    |
| 8  | -8.57999995E-02 | -0.173199996    | 0.597700000    |
| 9  | -0.122800000    | -0.222100005    | -0.833100021   |
| 10 | 0.134499997     | -0.136500001    | 2.81000007E-02 |
| 11 | 3.07999998E-02  | -9.12000015E-02 | 0.112300001    |
| 12 | 0.335500002     | -0.397899985    | 9.13000032E-02 |
| 13 | -4.82000001E-02 | 0.150700003     | 6.71000034E-02 |
| 14 | 0.302500010     | -0.286199987    | 0.314799994    |
| 15 | -0.376100004    | 0.278400004     | 0.382299989    |
| 16 | 5.88999987E-02  | 9.31999981E-02  | 0.331600010    |

#### Ground energy

-686.910461

#### Excitation energy

6.46339989  
6.76270008  
6.82200003  
7.19649982  
7.31580019  
7.46129990  
7.56090021  
7.58419991  
7.63430023  
7.82800007  
7.86180019  
7.94780016  
8.00520039  
8.16269970  
8.20219994  
8.25409985

#### F\_alpha

Number of atoms: 24

|   |          |          |          |
|---|----------|----------|----------|
| 1 | 2.73308  | -0.99348 | -0.69824 |
| 8 | 3.19801  | -0.14313 | -0.6429  |
| 6 | 2.64586  | 0.57901  | 0.42247  |
| 1 | 2.91955  | 1.62911  | 0.28591  |
| 1 | 3.06994  | 0.25313  | 1.38937  |
| 6 | 1.12555  | 0.51713  | 0.56284  |
| 1 | 0.85912  | 0.98403  | 1.52062  |
| 6 | 0.53436  | -0.8928  | 0.5719   |
| 1 | 0.84983  | -1.39506 | 1.49913  |
| 8 | 0.98915  | -1.62918 | -0.55235 |
| 1 | 0.48295  | -2.45824 | -0.55349 |
| 6 | -0.9918  | -0.85369 | 0.54563  |
| 1 | -1.35465 | -0.44413 | 1.49955  |
| 8 | -1.39343 | -2.20977 | 0.39258  |
| 1 | -2.35734 | -2.26249 | 0.44375  |
| 6 | -1.49214 | 0.01864  | -0.59469 |
| 1 | -1.19953 | -0.43447 | -1.54421 |
| 8 | -2.90074 | 0.16537  | -0.59911 |
| 1 | -3.23021 | 0.03077  | 0.30003  |
| 6 | -0.82561 | 1.39227  | -0.48699 |
| 8 | 0.57214  | 1.28937  | -0.50403 |
| 1 | -1.08149 | 2.00454  | -1.35764 |
| 8 | -1.30056 | 1.98073  | 0.70137  |
| 1 | -0.98515 | 2.89587  | 0.72389  |

# Electric moments

|    |    |                 |                 |                 |
|----|----|-----------------|-----------------|-----------------|
| 0  | 0  | -2.99710011     | -0.151899993    | 3.61299992      |
| 0  | 1  | 0.149700001     | 1.72000006E-02  | 0.100400001     |
| 0  | 2  | -8.60999972E-02 | 9.14999992E-02  | 0.194199994     |
| 0  | 3  | 3.42999995E-02  | 0.132900000     | 9.49999969E-03  |
| 0  | 4  | -7.97000006E-02 | 0.209199995     | -4.10000011E-02 |
| 0  | 5  | 0.149599999     | -8.63000005E-02 | -0.158800006    |
| 0  | 6  | -0.122000001    | -4.96000014E-02 | -2.67999992E-02 |
| 0  | 7  | 0.167999998     | -0.223000005    | 0.363599986     |
| 0  | 8  | -1.89999994E-02 | -8.10000002E-02 | 4.30999994E-02  |
| 0  | 9  | -1.37000000E-02 | -0.101300001    | 0.268999994     |
| 0  | 10 | 8.03000033E-02  | -6.15000017E-02 | 0.197799996     |
| 0  | 11 | -0.186000004    | 5.27999997E-02  | -0.222200006    |
| 0  | 12 | 3.40999998E-02  | 0.134399995     | -9.22999978E-02 |
| 0  | 13 | 6.06999993E-02  | 0.102100000     | 0.205599993     |
| 0  | 14 | -6.98999986E-02 | -9.30000003E-03 | 3.81000005E-02  |
| 0  | 15 | 0.199300006     | -7.93000013E-02 | 0.118400000     |
| 0  | 16 | -1.57999992E-02 | 3.22999991E-02  | 0.103200004     |
| 1  | 1  | 2.83620000      | 3.49880004      | -0.186800003    |
| 2  | 2  | -1.33879995     | 1.03199995      | -0.656199992    |
| 3  | 3  | 1.33539999      | 1.86409998      | 0.664200008     |
| 4  | 4  | -2.27690005     | -5.80249977     | 1.58800006      |
| 5  | 5  | -0.432999998    | 3.73469996      | 1.51390004      |
| 6  | 6  | -1.10450006     | -1.14800000     | 1.39859998      |
| 7  | 7  | 0.227799997     | -0.647499979    | 1.07889998      |
| 8  | 8  | 7.61759996      | 1.56750000      | 0.830699980     |
| 9  | 9  | 1.71039999      | -1.92600000     | 1.01010001      |
| 10 | 10 | 0.319700003     | -1.46089995     | 2.62680006      |

|    |    |              |              |             |
|----|----|--------------|--------------|-------------|
| 11 | 11 | -0.707300007 | -1.97700000  | 1.38600004  |
| 12 | 12 | -0.907800019 | -0.231900007 | 0.819899976 |
| 13 | 13 | 0.229599997  | 1.14489996   | 0.294200003 |
| 14 | 14 | -0.287800014 | 1.06710005   | 1.28020000  |
| 15 | 15 | 0.169100001  | -3.74489999  | 0.961600006 |
| 16 | 16 | 3.23920012   | 3.66969991   | 0.808300018 |

#### Magnetic moments

|    |                 |                 |                 |
|----|-----------------|-----------------|-----------------|
| 1  | 0.180099994     | -9.60000046E-03 | 0.567799985     |
| 2  | -0.223499998    | -9.35999975E-02 | -8.47999975E-02 |
| 3  | -0.497200012    | 0.146699995     | 0.461199999     |
| 4  | 7.41999969E-02  | -2.71000005E-02 | -0.174400002    |
| 5  | 0.370999992     | -5.35999984E-02 | -0.132400006    |
| 6  | 0.149399996     | -0.454499990    | -0.320699990    |
| 7  | -9.20000020E-03 | 0.363599986     | -0.255400002    |
| 8  | -4.80000023E-03 | 0.225299999     | -5.90000004E-02 |
| 9  | 0.627300024     | 0.676599979     | -0.195999995    |
| 10 | -0.377700001    | 0.503799975     | -0.231199995    |
| 11 | 6.93000033E-02  | 0.302399993     | -7.51999989E-02 |
| 12 | 0.247999996     | 0.515600026     | 6.84999973E-02  |
| 13 | 0.515200019     | -0.541400015    | 0.251100004     |
| 14 | -0.281100005    | -0.454600006    | 0.411300004     |
| 15 | 9.64000002E-02  | -0.244599998    | 0.139100000     |
| 16 | 0.229599997     | 3.22000012E-02  | -3.24000008E-02 |

#### Ground energy

-686.918457

#### Excitation energy

6.51959991  
6.91169977  
6.99760008  
7.09110022  
7.45270014  
7.49139977  
7.56790018  
7.61129999  
7.70340014  
7.82730007  
7.87190008  
7.89639997  
7.97279978  
8.03190041  
8.12500000  
8.16079998

#### G-Alpha

Number of atoms: 24

|   |         |          |          |
|---|---------|----------|----------|
| 1 | 3.11323 | -1.33575 | -0.36872 |
| 8 | 3.58096 | -0.49696 | -0.2636  |
| 6 | 2.62442 | 0.50219  | 0.03635  |
| 1 | 2.87388 | 1.39391  | -0.54893 |
| 1 | 2.6697  | 0.77624  | 1.09648  |
| 6 | 1.20953 | 0.07238  | -0.29615 |
| 1 | 1.2191  | -0.42431 | -1.27729 |

|   |          |          |          |
|---|----------|----------|----------|
| 6 | 0.21834  | 1.22718  | -0.36447 |
| 1 | 0.47765  | 1.87457  | -1.20655 |
| 8 | 0.31812  | 2.06228  | 0.78315  |
| 1 | -0.01892 | 1.5729   | 1.54791  |
| 6 | -1.20824 | 0.70851  | -0.57355 |
| 1 | -1.2428  | 0.21016  | -1.54851 |
| 8 | -2.13382 | 1.76221  | -0.6584  |
| 1 | -2.18134 | 2.18668  | 0.21105  |
| 6 | -1.5565  | -0.33503 | 0.49362  |
| 1 | -1.57854 | 0.13676  | 1.4843   |
| 8 | -2.82613 | -0.909   | 0.33012  |
| 1 | -2.84041 | -1.31665 | -0.5496  |
| 6 | -0.47207 | -1.41954 | 0.51939  |
| 8 | 0.81426  | -0.88138 | 0.70092  |
| 1 | -0.62628 | -2.08859 | 1.37207  |
| 8 | -0.59651 | -2.11611 | -0.69653 |
| 1 | -0.01333 | -2.88841 | -0.66868 |

#### Electric moments

|    |    |                 |                 |                 |
|----|----|-----------------|-----------------|-----------------|
| 0  | 0  | -0.263000011    | -2.50720000     | 0.198400006     |
| 0  | 1  | -0.115300000    | -7.15999976E-02 | -0.204500005    |
| 0  | 2  | -3.40000005E-03 | -7.45000020E-02 | -6.58999979E-02 |
| 0  | 3  | 8.32000002E-02  | -4.03999984E-02 | -3.88999991E-02 |
| 0  | 4  | -6.03000000E-02 | 4.98999991E-02  | -4.69999984E-02 |
| 0  | 5  | 0.177599996     | -7.81999975E-02 | -3.55000012E-02 |
| 0  | 6  | 0.178299993     | 0.258399993     | -0.293399990    |
| 0  | 7  | 1.97000001E-02  | 0.186600000     | -0.103699997    |
| 0  | 8  | -0.163599998    | -4.45999987E-02 | 0.132499993     |
| 0  | 9  | -0.214100003    | -5.73999994E-02 | -3.90999988E-02 |
| 0  | 10 | 2.96999998E-02  | 0.224399999     | -0.150900006    |
| 0  | 11 | -7.45000020E-02 | -0.175500005    | 0.158099994     |
| 0  | 12 | 3.80000006E-03  | -3.33999991E-02 | 0.275099993     |
| 0  | 13 | -4.74999994E-02 | 0.267100006     | -9.70000029E-03 |
| 0  | 14 | -2.63999999E-02 | 0.125400007     | -0.112700000    |
| 0  | 15 | 5.95999993E-02  | 0.176200002     | 1.41000003E-02  |
| 0  | 16 | -0.117600001    | 7.19999988E-03  | -0.125200003    |
| 1  | 1  | 3.92000005E-02  | 3.43039989      | 0.790400028     |
| 2  | 2  | 0.738799989     | -3.41370010     | -4.29320002     |
| 3  | 3  | -0.134800002    | 1.39279997      | -0.983799994    |
| 4  | 4  | -2.86999997E-02 | -2.65580010     | -1.99199998     |
| 5  | 5  | 0.650500000     | 0.297899991     | 2.71259999      |
| 6  | 6  | -1.33130002     | 1.15709996      | -0.206900001    |
| 7  | 7  | 0.677500010     | -1.15579998     | 2.64770007      |
| 8  | 8  | -0.705299973    | 0.806999981     | 0.753700018     |
| 9  | 9  | -2.65660000     | 2.63190007      | 1.12860000      |
| 10 | 10 | -0.330599993    | -3.76270008     | -0.754400015    |
| 11 | 11 | -1.36469996     | -0.123800002    | -1.03670001     |
| 12 | 12 | 3.08890009      | -1.12609994     | -1.46519995     |
| 13 | 13 | -9.79000032E-02 | 0.393599987     | 0.482400000     |
| 14 | 14 | 4.46560001      | -0.947899997    | -0.217700005    |
| 15 | 15 | 1.36210001      | -1.15590000     | 1.75610006      |
| 16 | 16 | -0.883700013    | -3.29520011     | -1.06340003     |

#### Magnetic moments

|    |                 |                 |                 |
|----|-----------------|-----------------|-----------------|
| 1  | -0.374799997    | -0.358399987    | 0.147400007     |
| 2  | -0.201000005    | -0.298799992    | 0.174400002     |
| 3  | -0.137999997    | -0.619199991    | -0.233400002    |
| 4  | -0.154899999    | -0.279799998    | -0.432099998    |
| 5  | 0.166299999     | -2.98999995E-02 | 0.477899998     |
| 6  | 0.201900005     | -8.34999979E-02 | 0.524100006     |
| 7  | -0.130199999    | 0.320100009     | 0.649699986     |
| 8  | 0.254099995     | 6.44999966E-02  | -0.142800003    |
| 9  | 0.555700004     | -1.67999994E-02 | 0.342700005     |
| 10 | -2.52999999E-02 | 0.319299996     | -6.49000034E-02 |
| 11 | -0.693400025    | -0.322299987    | 0.378399998     |
| 12 | 0.314799994     | 0.208600000     | -8.89999978E-03 |
| 13 | -0.173199996    | 6.47000000E-02  | -0.214000002    |
| 14 | 0.153500006     | -0.626999974    | 3.35000008E-02  |
| 15 | -0.143500000    | 0.259099990     | -0.188899994    |
| 16 | 0.231800005     | 2.05000006E-02  | 0.156200007     |

Ground energy

-686.914124

Excitation energy

6.73050022

6.85540009

6.93400002

7.13159990

7.35790014

7.53109980

7.53520012

7.70030022

7.77610016

7.85370016

7.96210003

8.04539967

8.08139992

8.17899990

8.19610023

8.25689983

A-Beta

Number of atoms: 24

|   |          |          |          |
|---|----------|----------|----------|
| 1 | -4.25772 | -0.13224 | -0.35469 |
| 8 | -3.33559 | -0.16198 | -0.64017 |
| 6 | -2.57542 | 0.65188  | 0.23164  |
| 1 | -2.64765 | 0.31059  | 1.27096  |
| 1 | -2.8803  | 1.70658  | 0.18515  |
| 6 | -1.12511 | 0.5377   | -0.19862 |
| 1 | -1.01515 | 0.97384  | -1.19994 |
| 6 | -0.65306 | -0.91787 | -0.27348 |
| 1 | -1.16535 | -1.40263 | -1.10974 |
| 8 | -0.98055 | -1.62095 | 0.91041  |
| 1 | -0.16008 | -1.87924 | 1.35069  |
| 6 | 0.85509  | -0.92533 | -0.51906 |

|   |          |          |          |
|---|----------|----------|----------|
| 1 | 1.03086  | -0.55431 | -1.54021 |
| 8 | 1.31869  | -2.25478 | -0.37578 |
| 1 | 2.26632  | -2.23934 | -0.57856 |
| 6 | 1.60975  | -0.01706 | 0.45132  |
| 1 | 1.55148  | -0.43296 | 1.46037  |
| 8 | 2.98505  | 0.0389   | 0.12673  |
| 1 | 3.0345   | 0.42651  | -0.76203 |
| 6 | 0.99213  | 1.37663  | 0.47084  |
| 8 | -0.37962 | 1.31599  | 0.73682  |
| 1 | 1.42107  | 1.97844  | 1.2788   |
| 8 | 1.28494  | 1.94791  | -0.78574 |
| 1 | 1.05851  | 2.88837  | -0.75466 |

#### Electric moments

|    |    |                 |                 |                 |
|----|----|-----------------|-----------------|-----------------|
| 0  | 0  | 0.274899989     | 3.36190009      | -0.648899972    |
| 0  | 1  | -0.107100002    | 2.38000005E-02  | -2.48000007E-02 |
| 0  | 2  | -7.02999979E-02 | -4.50999998E-02 | 9.92999971E-02  |
| 0  | 3  | -3.72000001E-02 | 1.72000006E-02  | -0.123700000    |
| 0  | 4  | 5.90999983E-02  | 0.150700003     | 4.50999998E-02  |
| 0  | 5  | 7.94000030E-02  | 9.48000029E-02  | 0.149399996     |
| 0  | 6  | -5.07999994E-02 | -0.367000014    | -0.284999996    |
| 0  | 7  | 0.158999994     | -7.24000037E-02 | -7.71000013E-02 |
| 0  | 8  | 0.121900000     | 6.52000010E-02  | -3.75999995E-02 |
| 0  | 9  | 0.261799991     | -7.69999996E-03 | 0.146500006     |
| 0  | 10 | 2.09999997E-02  | 2.59000007E-02  | -0.226099998    |
| 0  | 11 | -6.67999983E-02 | -0.174099997    | -6.31000027E-02 |
| 0  | 12 | 4.10000002E-03  | 6.44999966E-02  | -0.138500005    |
| 0  | 13 | 1.73000004E-02  | 1.35000004E-02  | 1.53999999E-02  |
| 0  | 14 | -6.09999988E-03 | 0.240700006     | -0.234799996    |
| 0  | 15 | 1.62000004E-02  | 3.48999985E-02  | 0.127200007     |
| 0  | 16 | 0.136600003     | 0.255100012     | -0.111100003    |
| 1  | 1  | 2.24659991      | 2.00920010      | 0.132799998     |
| 2  | 2  | 0.886600018     | 1.77610004      | 0.642899990     |
| 3  | 3  | -2.68339992     | -0.663900018    | -4.17999998E-02 |
| 4  | 4  | -1.41970003     | 4.45639992      | -3.96359992     |
| 5  | 5  | -0.969200015    | 2.46749997      | 0.359200001     |
| 6  | 6  | -2.62639999     | 2.74099994      | 1.69620001      |
| 7  | 7  | 1.72230005      | -2.94289994     | 0.225600004     |
| 8  | 8  | 5.90030003      | 1.40330005      | -2.01889992     |
| 9  | 9  | -2.46309996     | -1.82729995     | 0.730700016     |
| 10 | 10 | -1.28090000     | 0.166500002     | -0.191499993    |
| 11 | 11 | -5.09940004     | -4.51580000     | 1.14779997      |
| 12 | 12 | -1.78919995     | 0.227899998     | -0.489100009    |
| 13 | 13 | -1.53960001     | 5.99999987E-02  | 1.09440005      |
| 14 | 14 | -1.62269998     | 1.21930003      | -1.93840003     |
| 15 | 15 | 0.494300008     | -1.80960000     | -0.820900023    |
| 16 | 16 | -4.29899979     | 3.69449997      | 2.30259991      |

#### Magnetic moments

|   |              |                 |                |
|---|--------------|-----------------|----------------|
| 1 | -0.393999994 | 0.378800005     | 5.62000014E-02 |
| 2 | 0.103799999  | -8.51999968E-02 | -0.680400014   |
| 3 | -0.326099992 | -7.42999986E-02 | 0.172199994    |
| 4 | 0.238100007  | -0.328000009    | 0.272799999    |
| 5 | -0.268900007 | -0.269100010    | -0.176300004   |



|    |                 |                 |                 |
|----|-----------------|-----------------|-----------------|
| 6  | -0.542400002    | -0.466899991    | 0.491299987     |
| 7  | -0.499199986    | 0.405800015     | 0.131200001     |
| 8  | -0.493299991    | 7.00000022E-03  | -0.137999997    |
| 9  | 0.539499998     | 8.20999965E-02  | 0.255400002     |
| 10 | 8.56999978E-02  | -5.68999983E-02 | -4.41999994E-02 |
| 11 | -0.315299988    | -0.143399999    | -0.669900000    |
| 12 | -0.241899997    | -0.110600002    | -0.174999997    |
| 13 | -0.315200001    | 0.461400002     | 0.100199997     |
| 14 | -8.88999999E-02 | 0.391900003     | 0.517400026     |
| 15 | 1.44999996E-02  | -0.193000004    | 2.11999994E-02  |
| 16 | -3.90000008E-02 | 0.163100004     | 0.235100001     |

Ground energy

-686.918701

Exccitation energy

6.70289993

6.70919991

7.00150013

7.18069983

7.35290003

7.54949999

7.65329981

7.70310020

7.79820013

7.84240007

7.92749977

8.08520031

8.11789989

8.21560001

8.25189972

8.31130028

B-Beta

Number of atoms: 24

|   |          |          |          |
|---|----------|----------|----------|
| 1 | 3.10312  | 0.94187  | -0.72548 |
| 8 | 3.50647  | 0.09988  | -0.47664 |
| 6 | 2.57731  | -0.6352  | 0.29332  |
| 1 | 2.56787  | -0.30091 | 1.33755  |
| 1 | 2.89671  | -1.67912 | 0.26887  |
| 6 | 1.14668  | -0.54956 | -0.23074 |
| 1 | 1.09417  | -0.97984 | -1.2387  |
| 6 | 0.62091  | 0.89012  | -0.31016 |
| 1 | 1.0846   | 1.37291  | -1.18978 |
| 8 | 0.95184  | 1.61786  | 0.85319  |
| 1 | 0.16225  | 2.12054  | 1.10976  |
| 6 | -0.89268 | 0.87636  | -0.52097 |
| 1 | -1.11387 | 0.49365  | -1.52459 |
| 8 | -1.45561 | 2.17543  | -0.34507 |
| 1 | -0.99042 | 2.79746  | -0.92494 |
| 6 | -1.57952 | -0.02214 | 0.4882   |
| 1 | -1.38785 | 0.36734  | 1.49768  |
| 8 | -2.96888 | -0.1106  | 0.25168  |
| 1 | -3.24167 | 0.7162   | -0.17327 |

|   |          |          |          |
|---|----------|----------|----------|
| 6 | -0.97696 | -1.42076 | 0.40141  |
| 8 | 0.38823  | -1.35099 | 0.66964  |
| 1 | -1.40583 | -2.06707 | 1.17492  |
| 8 | -1.18085 | -1.96622 | -0.882   |
| 1 | -2.07303 | -2.33869 | -0.90473 |

#### Electric moments

|    |    |                 |                 |                 |
|----|----|-----------------|-----------------|-----------------|
| 0  | 0  | -2.98379993     | 2.15520000      | -1.79310000     |
| 0  | 1  | 7.54999965E-02  | 0.141000003     | 6.57000020E-02  |
| 0  | 2  | 6.00000005E-03  | 5.79999993E-03  | 0.229599997     |
| 0  | 3  | -0.100900002    | 0.177000001     | -0.240300000    |
| 0  | 4  | -1.99999995E-04 | -3.17000002E-02 | 9.99999978E-03  |
| 0  | 5  | -0.171299994    | 7.40000010E-02  | 0.255100012     |
| 0  | 6  | 0.170100003     | 0.247899994     | -0.264899999    |
| 0  | 7  | 0.116999999     | -5.31999990E-02 | -0.144800007    |
| 0  | 8  | 4.03999984E-02  | 5.00000007E-02  | 2.12999992E-02  |
| 0  | 9  | 4.83000018E-02  | -5.07999994E-02 | 0.125599995     |
| 0  | 10 | 7.64999986E-02  | 0.186600000     | 8.54000002E-02  |
| 0  | 11 | 6.70000017E-02  | -2.67999992E-02 | -1.32999998E-02 |
| 0  | 12 | 0.137500003     | 0.147599995     | -0.148200005    |
| 0  | 13 | -6.44000024E-02 | -7.05000013E-02 | -0.211099997    |
| 0  | 14 | -2.25000009E-02 | 0.142299995     | 0.243799999     |
| 0  | 15 | -0.126699999    | -4.65999991E-02 | 0.197200000     |
| 0  | 16 | -0.150000006    | 5.40000014E-02  | -0.106700003    |
| 1  | 1  | -2.06979990     | -3.71620011     | 1.88479996      |
| 2  | 2  | -1.96770000     | -4.11040020     | 1.96389997      |
| 3  | 3  | -1.81560004     | -3.66849995     | 2.23320007      |
| 4  | 4  | 7.72999972E-02  | 2.31850004      | -3.03000007E-02 |
| 5  | 5  | 0.123400003     | 1.70829999      | 0.182400003     |
| 6  | 6  | -1.44480002     | -1.27769995     | -1.79310000     |
| 7  | 7  | -2.20619988     | -1.93219995     | 0.518899977     |
| 8  | 8  | 1.43519998      | -3.08540010     | 1.93770003      |
| 9  | 9  | 0.749700010     | 0.377799988     | -0.203400001    |
| 10 | 10 | -1.12520003     | -2.21679997     | 0.334800005     |
| 11 | 11 | -0.226699993    | 1.11389995      | -1.58260000     |
| 12 | 12 | -2.16599989     | -1.97479999     | -1.12349999     |
| 13 | 13 | -1.35730004     | 0.695699990     | -2.92740011     |
| 14 | 14 | -2.24040008     | 2.28360009      | -0.388099998    |
| 15 | 15 | -0.715799987    | 1.10270000      | 1.11510003      |
| 16 | 16 | -1.23060000     | 1.07260001      | 1.57630002      |

#### Magnetic moments

|    |                 |                 |              |
|----|-----------------|-----------------|--------------|
| 1  | -0.426699996    | 0.463400006     | -0.171399996 |
| 2  | 0.218099996     | 0.407400012     | -0.253600001 |
| 3  | 0.333400011     | -7.97000006E-02 | -0.405499995 |
| 4  | 0.559499979     | -0.378399998    | -0.150800005 |
| 5  | -0.174199998    | -0.256900012    | 0.239199996  |
| 6  | 0.177900001     | -0.322800010    | 0.290199995  |
| 7  | 0.297300011     | 0.323700011     | -0.304300010 |
| 8  | -0.137600005    | -0.143399999    | -0.118500002 |
| 9  | 0.314500004     | -0.584699988    | -0.259499997 |
| 10 | 0.434700012     | -0.513100028    | -0.259600013 |
| 11 | 0.356599987     | 0.500500023     | -0.221399993 |
| 12 | -3.77000012E-02 | -0.236200005    | 0.501399994  |

|    |                 |                 |              |
|----|-----------------|-----------------|--------------|
| 13 | -0.488700002    | -0.243200004    | -0.219899997 |
| 14 | -0.102799997    | 4.900000006E-03 | 0.288100004  |
| 15 | -6.62000030E-02 | 0.151199996     | -0.188199997 |
| 16 | -0.222299993    | -0.501100004    | -0.168899998 |

Ground energy

-686.913208

Excitation energy

6.80079985

6.93510008

7.04160023

7.22940016

7.34159994

7.64709997

7.73699999

7.77750015

7.82180023

7.88539982

7.99529982

8.03499985

8.07310009

8.17980003

8.20139980

8.22140026

C-Beta

Number of atoms: 24

|   |          |          |          |
|---|----------|----------|----------|
| 1 | 3.48558  | 1.01057  | -0.22845 |
| 8 | 3.40415  | 0.16606  | -0.69267 |
| 6 | 2.60007  | -0.68005 | 0.10423  |
| 1 | 2.72943  | -0.48049 | 1.17394  |
| 1 | 2.91369  | -1.71046 | -0.08017 |
| 6 | 1.12725  | -0.53299 | -0.26094 |
| 1 | 0.94724  | -0.94959 | -1.25749 |
| 6 | 0.6483   | 0.91396  | -0.21079 |
| 1 | 1.17004  | 1.52     | -0.95404 |
| 8 | 0.93472  | 1.49353  | 1.0593   |
| 1 | 0.747    | 0.8047   | 1.7182   |
| 6 | -0.84662 | 0.93816  | -0.49412 |
| 1 | -0.99164 | 0.57815  | -1.5198  |
| 8 | -1.40021 | 2.24002  | -0.48614 |
| 1 | -1.39955 | 2.54452  | 0.43547  |
| 6 | -1.62315 | 0.01293  | 0.43857  |
| 1 | -1.59856 | 0.42869  | 1.45801  |
| 8 | -2.95737 | -0.10995 | -0.01221 |
| 1 | -3.18199 | 0.74199  | -0.42257 |
| 6 | -0.9864  | -1.38395 | 0.48229  |
| 8 | 0.39836  | -1.27739 | 0.71907  |
| 1 | -1.36218 | -1.94979 | 1.34161  |
| 8 | -1.25727 | -2.08177 | -0.69488 |
| 1 | -1.95466 | -1.59069 | -1.15996 |

Electric moments

|   |   |              |            |            |
|---|---|--------------|------------|------------|
| 0 | 0 | -0.982599974 | 1.56429994 | 1.48319995 |
|---|---|--------------|------------|------------|

|    |    |                 |                 |                 |
|----|----|-----------------|-----------------|-----------------|
| 0  | 1  | 0.152400002     | -1.75999999E-02 | 4.12999988E-02  |
| 0  | 2  | -0.192900002    | 1.68999992E-02  | -4.67000008E-02 |
| 0  | 3  | -0.165700004    | -7.11999983E-02 | -0.125200003    |
| 0  | 4  | 0.127000004     | 0.130199999     | -1.15999999E-02 |
| 0  | 5  | 0.112099998     | 6.06999993E-02  | -0.197200000    |
| 0  | 6  | 0.179600000     | 0.133900002     | -0.126200005    |
| 0  | 7  | -0.307700008    | -2.62000002E-02 | 0.209199995     |
| 0  | 8  | -7.85000026E-02 | 4.47999984E-02  | 5.27999997E-02  |
| 0  | 9  | 0.178900003     | -7.33999982E-02 | 0.468600005     |
| 0  | 10 | 7.60000013E-03  | -0.282200009    | 0.113899998     |
| 0  | 11 | -3.20000015E-02 | 1.76999997E-02  | 0.137899995     |
| 0  | 12 | 0.202099994     | -0.198300004    | -0.193599999    |
| 0  | 13 | 5.02999984E-02  | -0.112700000    | 8.79999995E-02  |
| 0  | 14 | -0.172199994    | 0.245399997     | 0.119999997     |
| 0  | 15 | 9.20000002E-02  | 4.43000011E-02  | 9.30000022E-02  |
| 0  | 16 | 0.108700000     | 0.234300002     | 1.37000000E-02  |
| 1  | 1  | 0.269499987     | -1.71010005     | -2.22639990     |
| 2  | 2  | -2.93219995     | -2.17319989     | -7.55999982E-02 |
| 3  | 3  | 1.31110001      | 0.214399993     | -0.452699989    |
| 4  | 4  | 1.90149999      | -0.328799993    | 1.67030001      |
| 5  | 5  | 4.30000015E-02  | -3.83000001E-02 | 2.22889996      |
| 6  | 6  | -7.90000036E-02 | 0.218099996     | 4.16069984      |
| 7  | 7  | 1.62769997      | -0.370700002    | -0.908800006    |
| 8  | 8  | 2.42379999      | -1.12199998     | 0.640799999     |
| 9  | 9  | 2.56150007      | 7.18000010E-02  | -2.69580007     |
| 10 | 10 | -1.00230002     | 1.04380000      | 2.89310002      |
| 11 | 11 | -2.56410003     | 0.605700016     | 2.35560012      |
| 12 | 12 | -1.09000001E-02 | 1.14110005      | -1.52590001     |
| 13 | 13 | -3.55559993     | 3.37360001      | 0.305700004     |
| 14 | 14 | -0.169200003    | 2.69000006      | 1.82040000      |
| 15 | 15 | 1.90100002      | 2.03609991      | 1.49790001      |
| 16 | 16 | -0.499599993    | -0.454200000    | -1.13460004     |

#### Magnetic moments

|    |                 |                |                 |
|----|-----------------|----------------|-----------------|
| 1  | -5.20999990E-02 | -0.131600007   | -7.46999979E-02 |
| 2  | 0.108700000     | -0.359200001   | -0.592199981    |
| 3  | -0.243799999    | 0.607599974    | -0.547399998    |
| 4  | 0.172700003     | 0.364600003    | -0.356799990    |
| 5  | -0.380199999    | -0.424100012   | 0.126100004     |
| 6  | -0.230700001    | 0.399699986    | -2.83000004E-02 |
| 7  | -6.53000027E-02 | -0.289700001   | -0.459899992    |
| 8  | -0.502499998    | 0.206100002    | -0.426699996    |
| 9  | 0.272199988     | 8.72000009E-02 | 0.249799997     |
| 10 | -0.308800012    | 1.49999997E-02 | 7.90000036E-02  |
| 11 | 9.71999988E-02  | 6.03000000E-02 | -9.04999971E-02 |
| 12 | -1.75999999E-02 | 0.769400001    | 0.307000011     |
| 13 | -0.140599996    | 0.100500003    | 9.32999998E-02  |
| 14 | -6.44000024E-02 | 0.519800007    | -0.181700006    |
| 15 | -0.118199997    | -0.120999999   | -0.119300000    |
| 16 | -0.261599988    | -0.182999998   | 0.138999999     |

Ground energy

-686.919922

Excitation energy

6.91459990  
7.11460018  
7.26590014  
7.51149988  
7.63509989  
7.66930008  
7.83279991  
7.97310019  
8.06369972  
8.13239956  
8.16800022  
8.24050045  
8.38980007  
8.42780018  
8.47630024  
8.49409962

# D-Beta

Number of atoms: 24

|   |          |          |          |
|---|----------|----------|----------|
| 1 | -3.19106 | 0.74285  | 1.12144  |
| 8 | -3.52586 | -0.07032 | 0.71872  |
| 6 | -2.62636 | -0.47724 | -0.295   |
| 1 | -2.73606 | 0.12784  | -1.20233 |
| 1 | -2.87691 | -1.51242 | -0.53499 |
| 6 | -1.17718 | -0.43658 | 0.16906  |
| 1 | -1.10526 | -0.90446 | 1.15688  |
| 6 | -0.5657  | 0.96314  | 0.20106  |
| 1 | -1.04387 | 1.56691  | 0.98045  |
| 8 | -0.82129 | 1.66632  | -1.00942 |
| 1 | -0.22569 | 1.32943  | -1.69387 |
| 6 | 0.92937  | 0.91315  | 0.52565  |
| 1 | 1.04376  | 0.50486  | 1.5335   |
| 8 | 1.48586  | 2.20355  | 0.58112  |
| 1 | 1.41502  | 2.59571  | -0.30195 |
| 6 | 1.65534  | -0.03331 | -0.42919 |
| 1 | 1.68491  | 0.39027  | -1.4459  |
| 8 | 2.97331  | -0.22828 | 0.05646  |
| 1 | 3.34605  | -1.01402 | -0.37344 |
| 6 | 0.90904  | -1.38132 | -0.47031 |
| 8 | -0.4391  | -1.2189  | -0.78131 |
| 1 | 1.30388  | -2.01188 | -1.28062 |
| 8 | 1.04834  | -2.02802 | 0.76723  |
| 1 | 1.86807  | -1.69694 | 1.1709   |

Electric moments

|   |   |                 |                 |                |
|---|---|-----------------|-----------------|----------------|
| 0 | 0 | 3.07380009      | -0.365599990    | -1.98080003    |
| 0 | 1 | 6.56000003E-02  | 5.95000014E-02  | 0.152300000    |
| 0 | 2 | 8.26999992E-02  | -9.49999988E-02 | 0.103900000    |
| 0 | 3 | -7.54000023E-02 | 7.09000006E-02  | -0.138999999   |
| 0 | 4 | -6.91000000E-02 | -7.40000000E-03 | -0.107900001   |
| 0 | 5 | -0.183799997    | 3.90000008E-02  | 5.20000011E-02 |
| 0 | 6 | 0.213799998     | -1.30000000E-03 | -0.313499987   |
| 0 | 7 | 0.318100005     | -7.20999986E-02 | -0.295800000   |

|    |    |                 |                 |                 |
|----|----|-----------------|-----------------|-----------------|
| 0  | 8  | -7.94999972E-02 | 0.402700007     | -9.60000046E-03 |
| 0  | 9  | 1.60000008E-02  | 3.88999991E-02  | -0.184900001    |
| 0  | 10 | 9.91000012E-02  | -0.101400003    | -1.46000003E-02 |
| 0  | 11 | -9.13000032E-02 | 0.108400002     | -1.43999998E-02 |
| 0  | 12 | -4.01000008E-02 | 0.188899994     | 0.158800006     |
| 0  | 13 | -1.55999996E-02 | -0.178499997    | 9.25000012E-02  |
| 0  | 14 | 0.138099998     | -0.176799998    | 0.194000006     |
| 0  | 15 | 3.70999984E-02  | 5.38000017E-02  | 0.111699998     |
| 0  | 16 | -2.95000002E-02 | -8.03000033E-02 | 5.31000011E-02  |
| 1  | 1  | -0.839699984    | -1.73329997     | 3.47390008      |
| 2  | 2  | 2.06080008      | -2.94819999     | -3.45070004     |
| 3  | 3  | -1.25059998     | 1.20000001E-02  | -0.376700014    |
| 4  | 4  | 0.994499981     | -2.75950003     | 3.29380012      |
| 5  | 5  | -1.85759997     | 3.20790005      | -0.536599994    |
| 6  | 6  | 3.36260009      | -1.13049996     | -4.67549992     |
| 7  | 7  | 2.50020003      | -1.21229994     | -1.66779995     |
| 8  | 8  | 2.77080011      | -0.255499989    | -1.20630002     |
| 9  | 9  | -3.10170007     | -1.53830004     | 2.89750004      |
| 10 | 10 | -5.64930010     | 3.62240005      | 0.856199980     |
| 11 | 11 | 1.93250000      | -0.457800001    | -1.54620004     |
| 12 | 12 | 8.69000033E-02  | -2.28080010     | 1.67530000      |
| 13 | 13 | 2.61960006      | -0.269600004    | -1.80460000     |
| 14 | 14 | -1.24030006     | 3.14280009      | 0.848399997     |
| 15 | 15 | 1.52470005      | -0.583500028    | -2.32850003     |
| 16 | 16 | 2.61649990      | 0.999800026     | 0.918399990     |

#### Magnetic moments

|    |                 |                 |                 |
|----|-----------------|-----------------|-----------------|
| 1  | -0.144099995    | 9.52999964E-02  | -0.171299994    |
| 2  | -0.315600008    | -0.273799986    | -0.104000002    |
| 3  | 0.188199997     | 0.630599976     | 0.474299997     |
| 4  | -0.324299991    | -2.16000006E-02 | -0.538500011    |
| 5  | -6.23000003E-02 | 0.415399998     | 0.175699994     |
| 6  | -8.39999989E-02 | -0.127900004    | -8.10000021E-03 |
| 7  | -0.460200012    | -0.107199997    | 0.550000012     |
| 8  | -0.196700007    | -8.89999978E-03 | -5.10000018E-03 |
| 9  | -1.62000004E-02 | 0.639599979     | 0.218400002     |
| 10 | -1.32999998E-02 | 0.154300004     | -0.199399993    |
| 11 | -0.666999996    | -0.354099989    | -0.381599993    |
| 12 | -9.62999985E-02 | 5.33000007E-02  | 7.16999993E-02  |
| 13 | 0.282700002     | 8.57999995E-02  | -8.70999992E-02 |
| 14 | 0.153400004     | 1.39999995E-03  | 0.386500001     |
| 15 | 0.265899986     | 0.366400003     | 2.36000009E-02  |
| 16 | 3.35000008E-02  | -0.371499985    | 0.160799995     |

#### Ground energy

-686.905090

#### Excitation energy

6.79430008  
6.87050009  
6.91039991  
7.10680008  
7.41249990  
7.52199984  
7.61590004

7.83500004  
7.86089993  
7.87069988  
7.94339991  
7.98769999  
8.13319969  
8.19349957  
8.30249977  
8.33290005

#### E-Beta

Number of atoms: 24

|   |          |          |          |
|---|----------|----------|----------|
| 1 | 3.29334  | -0.30728 | -1.45475 |
| 8 | 3.49309  | 0.08436  | -0.59242 |
| 6 | 2.60553  | -0.47467 | 0.35809  |
| 1 | 2.68158  | 0.13224  | 1.25996  |
| 1 | 2.87555  | -1.51009 | 0.6072   |
| 6 | 1.16999  | -0.47125 | -0.14604 |
| 1 | 1.1353   | -0.93223 | -1.14378 |
| 6 | 0.57762  | 0.92999  | -0.2505  |
| 1 | 1.10527  | 1.46024  | -1.05294 |
| 8 | 0.76327  | 1.60734  | 0.98664  |
| 1 | 0.73423  | 2.5535   | 0.7908   |
| 6 | -0.91896 | 0.88743  | -0.5746  |
| 1 | -1.07519 | 0.49156  | -1.5813  |
| 8 | -1.44868 | 2.20154  | -0.56947 |
| 1 | -1.72657 | 2.40182  | 0.33529  |
| 6 | -1.61033 | -0.02595 | 0.42378  |
| 1 | -1.52245 | 0.4162   | 1.42657  |
| 8 | -2.97058 | -0.17514 | 0.04276  |
| 1 | -3.42737 | -0.65737 | 0.74778  |
| 6 | -0.9218  | -1.39673 | 0.43553  |
| 8 | 0.42425  | -1.28259 | 0.76052  |
| 1 | -1.36    | -2.03855 | 1.21379  |
| 8 | -1.03113 | -1.99898 | -0.83359 |
| 1 | -1.96777 | -2.19518 | -0.98172 |

#### Electric moments

|   |    |                 |                 |                 |
|---|----|-----------------|-----------------|-----------------|
| 0 | 0  | -2.61129999     | -1.01030004     | 0.853799999     |
| 0 | 1  | 4.69999984E-02  | 0.109999999     | -0.129700005    |
| 0 | 2  | -9.73000005E-02 | 8.42000023E-02  | 5.68999983E-02  |
| 0 | 3  | -8.70999992E-02 | 4.43000011E-02  | -4.85999994E-02 |
| 0 | 4  | 0.116200000     | -9.01999995E-02 | -0.105200000    |
| 0 | 5  | 0.185399994     | -0.100699998    | 0.140499994     |
| 0 | 6  | -0.160300002    | -6.23999983E-02 | 0.251100004     |
| 0 | 7  | 1.43999998E-02  | -0.223299995    | 7.40000010E-02  |
| 0 | 8  | 0.386700004     | 0.150600001     | -6.97000027E-02 |
| 0 | 9  | -0.292499989    | -0.273799986    | 0.245700002     |
| 0 | 10 | 0.123999998     | -7.32000023E-02 | -0.161899999    |
| 0 | 11 | 8.60000029E-02  | 9.60000008E-02  | 0.141000003     |
| 0 | 12 | 8.16000029E-02  | -0.105099998    | -9.67999995E-02 |
| 0 | 13 | -5.55999987E-02 | 2.42999997E-02  | 0.184599996     |
| 0 | 14 | 0.139300004     | -0.275799990    | -7.47999996E-02 |

|    |    |                 |                 |                |
|----|----|-----------------|-----------------|----------------|
| 0  | 15 | 1.72000006E-02  | -7.84000009E-02 | 0.124100000    |
| 0  | 16 | -2.00999994E-02 | 0.209900007     | 4.19999985E-03 |
| 1  | 1  | 4.05700016      | 1.52980006      | -2.90319991    |
| 2  | 2  | -2.00990009     | -5.27549982     | -0.439399987   |
| 3  | 3  | -2.96600008     | -0.426200002    | 4.31689978     |
| 4  | 4  | 0.358200014     | 1.13220000      | 0.804400027    |
| 5  | 5  | 0.816999972     | -1.84759998     | -1.36039996    |
| 6  | 6  | -1.46159995     | 1.17429996      | 1.01820004     |
| 7  | 7  | -0.845399976    | -3.11540008     | -0.549600005   |
| 8  | 8  | 2.43400002      | 1.29709995      | -2.47679996    |
| 9  | 9  | -0.465700001    | -2.70560002     | -0.108900003   |
| 10 | 10 | 1.65090001      | 1.71120000      | -1.71889997    |
| 11 | 11 | 0.883199990     | 2.98070002      | 0.459500015    |
| 12 | 12 | -4.06739998     | -1.79929996     | 2.95910001     |
| 13 | 13 | 1.18589997      | -2.67750001     | -2.50830007    |
| 14 | 14 | -2.38470006     | -0.635800004    | 2.41240001     |
| 15 | 15 | -1.00549996     | -0.523800015    | 1.53849995     |
| 16 | 16 | 2.75359988      | 0.766900003     | -1.12189996    |

#### Magnetic moments

|    |                 |                 |                |
|----|-----------------|-----------------|----------------|
| 1  | 6.76999986E-02  | -0.102600001    | 0.483900011    |
| 2  | -0.329899997    | 4.98000011E-02  | 1.37000000E-02 |
| 3  | -0.300300002    | -0.455100000    | -0.410299987   |
| 4  | 0.208000004     | 0.230299994     | -0.331600010   |
| 5  | 0.375000000     | -0.294400007    | 0.263399988    |
| 6  | 0.259200007     | -0.294600010    | 0.564899981    |
| 7  | -0.254500002    | 0.126499996     | 0.290199995    |
| 8  | -8.57999995E-02 | -0.173199996    | 0.597700000    |
| 9  | -0.122800000    | -0.222100005    | -0.833100021   |
| 10 | 0.134499997     | -0.136500001    | 2.81000007E-02 |
| 11 | 3.07999998E-02  | -9.12000015E-02 | 0.112300001    |
| 12 | 0.335500002     | -0.397899985    | 9.13000032E-02 |
| 13 | -4.82000001E-02 | 0.150700003     | 6.71000034E-02 |
| 14 | 0.302500010     | -0.286199987    | 0.314799994    |
| 15 | -0.376100004    | 0.278400004     | 0.382299989    |
| 16 | 5.88999987E-02  | 9.31999981E-02  | 0.331600010    |

#### Ground energy

-686.910461

#### Excitation energy

6.46339989  
6.76270008  
6.82200003  
7.19649982  
7.31580019  
7.46129990  
7.56090021  
7.58419991  
7.63430023  
7.82800007  
7.86180019  
7.94780016  
8.00520039  
8.16269970



8.20219994

8.25409985

# F-Beta

Number of atoms: 24

|   |          |          |          |
|---|----------|----------|----------|
| 1 | 2.73308  | -0.99348 | -0.69824 |
| 8 | 3.19801  | -0.14313 | -0.6429  |
| 6 | 2.64586  | 0.57901  | 0.42247  |
| 1 | 2.91955  | 1.62911  | 0.28591  |
| 1 | 3.06994  | 0.25313  | 1.38937  |
| 6 | 1.12555  | 0.51713  | 0.56284  |
| 1 | 0.85912  | 0.98403  | 1.52062  |
| 6 | 0.53436  | -0.8928  | 0.5719   |
| 1 | 0.84983  | -1.39506 | 1.49913  |
| 8 | 0.98915  | -1.62918 | -0.55235 |
| 1 | 0.48295  | -2.45824 | -0.55349 |
| 6 | -0.9918  | -0.85369 | 0.54563  |
| 1 | -1.35465 | -0.44413 | 1.49955  |
| 8 | -1.39343 | -2.20977 | 0.39258  |
| 1 | -2.35734 | -2.26249 | 0.44375  |
| 6 | -1.49214 | 0.01864  | -0.59469 |
| 1 | -1.19953 | -0.43447 | -1.54421 |
| 8 | -2.90074 | 0.16537  | -0.59911 |
| 1 | -3.23021 | 0.03077  | 0.30003  |
| 6 | -0.82561 | 1.39227  | -0.48699 |
| 8 | 0.57214  | 1.28937  | -0.50403 |
| 1 | -1.08149 | 2.00454  | -1.35764 |
| 8 | -1.30056 | 1.98073  | 0.70137  |
| 1 | -0.98515 | 2.89587  | 0.72389  |

# Electric moments

|   |    |                 |                 |                 |
|---|----|-----------------|-----------------|-----------------|
| 0 | 0  | -2.99710011     | -0.151899993    | 3.61299992      |
| 0 | 1  | 0.149700001     | 1.72000006E-02  | 0.100400001     |
| 0 | 2  | -8.60999972E-02 | 9.14999992E-02  | 0.194199994     |
| 0 | 3  | 3.42999995E-02  | 0.132900000     | 9.49999969E-03  |
| 0 | 4  | -7.97000006E-02 | 0.209199995     | -4.10000011E-02 |
| 0 | 5  | 0.149599999     | -8.63000005E-02 | -0.158800006    |
| 0 | 6  | -0.122000001    | -4.96000014E-02 | -2.67999992E-02 |
| 0 | 7  | 0.167999998     | -0.223000005    | 0.363599986     |
| 0 | 8  | -1.89999994E-02 | -8.10000002E-02 | 4.30999994E-02  |
| 0 | 9  | -1.37000000E-02 | -0.101300001    | 0.268999994     |
| 0 | 10 | 8.03000033E-02  | -6.15000017E-02 | 0.197799996     |
| 0 | 11 | -0.186000004    | 5.27999997E-02  | -0.222200006    |
| 0 | 12 | 3.40999998E-02  | 0.134399995     | -9.22999978E-02 |
| 0 | 13 | 6.06999993E-02  | 0.102100000     | 0.205599993     |
| 0 | 14 | -6.98999986E-02 | -9.30000003E-03 | 3.81000005E-02  |
| 0 | 15 | 0.199300006     | -7.93000013E-02 | 0.118400000     |
| 0 | 16 | -1.57999992E-02 | 3.22999991E-02  | 0.103200004     |
| 1 | 1  | 2.83620000      | 3.49880004      | -0.186800003    |
| 2 | 2  | -1.33879995     | 1.03199995      | -0.656199992    |
| 3 | 3  | 1.33539999      | 1.86409998      | 0.664200008     |
| 4 | 4  | -2.27690005     | -5.80249977     | 1.58800006      |
| 5 | 5  | -0.432999998    | 3.73469996      | 1.51390004      |

|    |    |              |              |             |
|----|----|--------------|--------------|-------------|
| 6  | 6  | -1.10450006  | -1.14800000  | 1.39859998  |
| 7  | 7  | 0.227799997  | -0.647499979 | 1.07889998  |
| 8  | 8  | 7.61759996   | 1.56750000   | 0.830699980 |
| 9  | 9  | 1.71039999   | -1.92600000  | 1.01010001  |
| 10 | 10 | 0.319700003  | -1.46089995  | 2.62680006  |
| 11 | 11 | -0.707300007 | -1.97700000  | 1.38600004  |
| 12 | 12 | -0.907800019 | -0.231900007 | 0.819899976 |
| 13 | 13 | 0.229599997  | 1.14489996   | 0.294200003 |
| 14 | 14 | -0.287800014 | 1.06710005   | 1.28020000  |
| 15 | 15 | 0.169100001  | -3.74489999  | 0.961600006 |
| 16 | 16 | 3.23920012   | 3.66969991   | 0.808300018 |

#### Magnetic moments

|    |                 |                 |                 |
|----|-----------------|-----------------|-----------------|
| 1  | 0.180099994     | -9.60000046E-03 | 0.567799985     |
| 2  | -0.223499998    | -9.35999975E-02 | -8.47999975E-02 |
| 3  | -0.497200012    | 0.146699995     | 0.461199999     |
| 4  | 7.41999969E-02  | -2.71000005E-02 | -0.174400002    |
| 5  | 0.370999992     | -5.35999984E-02 | -0.132400006    |
| 6  | 0.149399996     | -0.454499990    | -0.320699990    |
| 7  | -9.20000020E-03 | 0.363599986     | -0.255400002    |
| 8  | -4.80000023E-03 | 0.225299999     | -5.90000004E-02 |
| 9  | 0.627300024     | 0.676599979     | -0.195999995    |
| 10 | -0.377700001    | 0.503799975     | -0.231199995    |
| 11 | 6.93000033E-02  | 0.302399993     | -7.51999989E-02 |
| 12 | 0.247999996     | 0.515600026     | 6.84999973E-02  |
| 13 | 0.515200019     | -0.541400015    | 0.251100004     |
| 14 | -0.281100005    | -0.454600006    | 0.411300004     |
| 15 | 9.64000002E-02  | -0.244599998    | 0.139100000     |
| 16 | 0.229599997     | 3.22000012E-02  | -3.24000008E-02 |

#### Ground energy

-686.918457

#### Excitation energy

6.51959991  
6.91169977  
6.99760008  
7.09110022  
7.45270014  
7.49139977  
7.56790018  
7.61129999  
7.70340014  
7.82730007  
7.87190008  
7.89639997  
7.97279978  
8.03190041  
8.12500000  
8.16079998

#### G-Beta

Number of atoms: 24

|   |         |          |          |
|---|---------|----------|----------|
| 1 | 3.11323 | -1.33575 | -0.36872 |
| 8 | 3.58096 | -0.49696 | -0.2636  |

|   |          |          |          |
|---|----------|----------|----------|
| 6 | 2.62442  | 0.50219  | 0.03635  |
| 1 | 2.87388  | 1.39391  | -0.54893 |
| 1 | 2.6697   | 0.77624  | 1.09648  |
| 6 | 1.20953  | 0.07238  | -0.29615 |
| 1 | 1.2191   | -0.42431 | -1.27729 |
| 6 | 0.21834  | 1.22718  | -0.36447 |
| 1 | 0.47765  | 1.87457  | -1.20655 |
| 8 | 0.31812  | 2.06228  | 0.78315  |
| 1 | -0.01892 | 1.5729   | 1.54791  |
| 6 | -1.20824 | 0.70851  | -0.57355 |
| 1 | -1.2428  | 0.21016  | -1.54851 |
| 8 | -2.13382 | 1.76221  | -0.6584  |
| 1 | -2.18134 | 2.18668  | 0.21105  |
| 6 | -1.5565  | -0.33503 | 0.49362  |
| 1 | -1.57854 | 0.13676  | 1.4843   |
| 8 | -2.82613 | -0.909   | 0.33012  |
| 1 | -2.84041 | -1.31665 | -0.5496  |
| 6 | -0.47207 | -1.41954 | 0.51939  |
| 8 | 0.81426  | -0.88138 | 0.70092  |
| 1 | -0.62628 | -2.08859 | 1.37207  |
| 8 | -0.59651 | -2.11611 | -0.69653 |
| 1 | -0.01333 | -2.88841 | -0.66868 |

#### Electric moments

|    |    |                 |                 |                 |
|----|----|-----------------|-----------------|-----------------|
| 0  | 0  | -0.263000011    | -2.50720000     | 0.198400006     |
| 0  | 1  | -0.115300000    | -7.15999976E-02 | -0.204500005    |
| 0  | 2  | -3.40000005E-03 | -7.45000020E-02 | -6.58999979E-02 |
| 0  | 3  | 8.32000002E-02  | -4.03999984E-02 | -3.88999991E-02 |
| 0  | 4  | -6.03000000E-02 | 4.98999991E-02  | -4.69999984E-02 |
| 0  | 5  | 0.177599996     | -7.81999975E-02 | -3.55000012E-02 |
| 0  | 6  | 0.178299993     | 0.258399993     | -0.293399990    |
| 0  | 7  | 1.97000001E-02  | 0.186600000     | -0.103699997    |
| 0  | 8  | -0.163599998    | -4.45999987E-02 | 0.132499993     |
| 0  | 9  | -0.214100003    | -5.73999994E-02 | -3.90999988E-02 |
| 0  | 10 | 2.96999998E-02  | 0.224399999     | -0.150900006    |
| 0  | 11 | -7.45000020E-02 | -0.175500005    | 0.158099994     |
| 0  | 12 | 3.80000006E-03  | -3.33999991E-02 | 0.275099993     |
| 0  | 13 | -4.74999994E-02 | 0.267100006     | -9.70000029E-03 |
| 0  | 14 | -2.63999999E-02 | 0.125400007     | -0.112700000    |
| 0  | 15 | 5.95999993E-02  | 0.176200002     | 1.41000003E-02  |
| 0  | 16 | -0.117600001    | 7.19999988E-03  | -0.125200003    |
| 1  | 1  | 3.92000005E-02  | 3.43039989      | 0.790400028     |
| 2  | 2  | 0.738799989     | -3.41370010     | -4.29320002     |
| 3  | 3  | -0.134800002    | 1.39279997      | -0.983799994    |
| 4  | 4  | -2.86999997E-02 | -2.65580010     | -1.99199998     |
| 5  | 5  | 0.650500000     | 0.297899991     | 2.71259999      |
| 6  | 6  | -1.33130002     | 1.15709996      | -0.206900001    |
| 7  | 7  | 0.677500010     | -1.15579998     | 2.64770007      |
| 8  | 8  | -0.705299973    | 0.806999981     | 0.753700018     |
| 9  | 9  | -2.65660000     | 2.63190007      | 1.12860000      |
| 10 | 10 | -0.330599993    | -3.76270008     | -0.754400015    |
| 11 | 11 | -1.36469996     | -0.123800002    | -1.03670001     |
| 12 | 12 | 3.08890009      | -1.12609994     | -1.46519995     |

|    |    |                 |              |              |
|----|----|-----------------|--------------|--------------|
| 13 | 13 | -9.79000032E-02 | 0.393599987  | 0.482400000  |
| 14 | 14 | 4.46560001      | -0.947899997 | -0.217700005 |
| 15 | 15 | 1.36210001      | -1.15590000  | 1.75610006   |
| 16 | 16 | -0.883700013    | -3.29520011  | -1.06340003  |

#### Magnetic moments

|    |                 |                 |                 |
|----|-----------------|-----------------|-----------------|
| 1  | -0.374799997    | -0.358399987    | 0.147400007     |
| 2  | -0.201000005    | -0.298799992    | 0.174400002     |
| 3  | -0.137999997    | -0.619199991    | -0.233400002    |
| 4  | -0.154899999    | -0.279799998    | -0.432099998    |
| 5  | 0.166299999     | -2.98999995E-02 | 0.477899998     |
| 6  | 0.201900005     | -8.34999979E-02 | 0.524100006     |
| 7  | -0.130199999    | 0.320100009     | 0.649699986     |
| 8  | 0.254099995     | 6.44999966E-02  | -0.142800003    |
| 9  | 0.555700004     | -1.67999994E-02 | 0.342700005     |
| 10 | -2.52999999E-02 | 0.319299996     | -6.49000034E-02 |
| 11 | -0.693400025    | -0.322299987    | 0.378399998     |
| 12 | 0.314799994     | 0.208600000     | -8.89999978E-03 |
| 13 | -0.173199996    | 6.47000000E-02  | -0.214000002    |
| 14 | 0.153500006     | -0.626999974    | 3.35000008E-02  |
| 15 | -0.143500000    | 0.259099990     | -0.188899994    |
| 16 | 0.231800005     | 2.05000006E-02  | 0.156200007     |

#### Ground energy

-686.914124

#### Excitation energy

6.73050022  
6.85540009  
6.93400002  
7.13159990  
7.35790014  
7.53109980  
7.53520012  
7.70030022  
7.77610016  
7.85370016  
7.96210003  
8.04539967  
8.08139992  
8.17899990  
8.19610023  
8.25689983

#### H-Beta

##### Number of atoms: 24

|   |          |          |          |
|---|----------|----------|----------|
| 1 | -2.80894 | 1.39213  | -1.15073 |
| 8 | -3.30209 | 0.96183  | -0.43949 |
| 6 | -2.65164 | -0.24647 | -0.1103  |
| 1 | -3.0846  | -1.09817 | -0.65734 |
| 1 | -2.81481 | -0.41971 | 0.95514  |
| 6 | -1.16024 | -0.22197 | -0.39663 |
| 1 | -0.98465 | -0.19508 | -1.48292 |
| 6 | -0.41017 | -1.4196  | 0.19711  |
| 1 | -0.746   | -2.34392 | -0.27995 |

|   |          |          |          |
|---|----------|----------|----------|
| 8 | -0.68673 | -1.55943 | 1.57604  |
| 1 | -0.44834 | -0.72232 | 2.00363  |
| 6 | 1.09105  | -1.26639 | -0.07017 |
| 1 | 1.62162  | -2.0621  | 0.46752  |
| 8 | 1.27374  | -1.38675 | -1.46986 |
| 1 | 2.20701  | -1.58728 | -1.62446 |
| 6 | 1.59637  | 0.08907  | 0.41337  |
| 1 | 1.50285  | 0.15796  | 1.50807  |
| 8 | 2.94304  | 0.214    | 0.01437  |
| 1 | 3.20489  | 1.13218  | 0.1823   |
| 6 | 0.72615  | 1.18709  | -0.17509 |
| 8 | -0.62403 | 0.97212  | 0.18769  |
| 1 | 0.8113   | 1.18517  | -1.2731  |
| 8 | 1.14241  | 2.39773  | 0.37347  |
| 1 | 0.42     | 3.03465  | 0.2642   |

#### Electric moments

|    |    |                 |                 |                 |
|----|----|-----------------|-----------------|-----------------|
| 0  | 0  | 1.83130002      | 0.671100020     | -1.37839997     |
| 0  | 1  | -3.07000000E-02 | 5.48000000E-02  | -7.22000003E-02 |
| 0  | 2  | 0.119400002     | 0.101099998     | 0.171000004     |
| 0  | 3  | 9.30999964E-02  | 2.79999990E-03  | 4.45999987E-02  |
| 0  | 4  | -0.268700004    | 3.92999984E-02  | 7.22000003E-02  |
| 0  | 5  | 9.76999998E-02  | -0.179199994    | -0.170699999    |
| 0  | 6  | -7.94000030E-02 | 0.221100003     | -0.368099988    |
| 0  | 7  | -4.28000018E-02 | 8.00000038E-03  | -0.169300005    |
| 0  | 8  | 6.36000037E-02  | -8.85000005E-02 | -4.16000001E-02 |
| 0  | 9  | -2.15000007E-02 | -5.70000000E-02 | -0.187800005    |
| 0  | 10 | -2.97999997E-02 | -0.105700001    | -2.86999997E-02 |
| 0  | 11 | 5.70000010E-03  | -0.265500009    | -0.112899996    |
| 0  | 12 | -1.98999997E-02 | 0.139200002     | 3.88000011E-02  |
| 0  | 13 | 7.66000003E-02  | 8.95999968E-02  | 0.117899999     |
| 0  | 14 | -0.149200007    | 5.16000018E-02  | 0.190300003     |
| 0  | 15 | -0.134800002    | -0.259600013    | 0.404199988     |
| 0  | 16 | -0.169200003    | -0.199200004    | 4.60000001E-02  |
| 1  | 1  | 1.43859994      | -3.52259994     | 2.68549991      |
| 2  | 2  | 2.35290003      | -5.20069981     | 1.92429996      |
| 3  | 3  | -1.92040002     | 1.63320005      | 0.140300006     |
| 4  | 4  | 0.456000000     | 1.22239995      | -5.02899981     |
| 5  | 5  | -1.56930006     | 0.766799986     | -1.75469995     |
| 6  | 6  | 1.58270001      | -0.557200015    | 1.98800004      |
| 7  | 7  | 1.96459997      | 1.59809995      | -6.62470007     |
| 8  | 8  | -1.84060001     | 2.39569998      | 0.754599988     |
| 9  | 9  | 2.27430010      | -2.99460006     | 1.48300004      |
| 10 | 10 | 1.14590001      | 0.802800000     | -0.139100000    |
| 11 | 11 | 2.06150007      | 3.20740008      | -0.967800021    |
| 12 | 12 | -1.56389999     | 0.604099989     | -4.04239988     |
| 13 | 13 | 1.29380000      | -1.54869998     | -0.823300004    |
| 14 | 14 | 3.25959992      | 0.857800007     | 0.114500001     |
| 15 | 15 | 1.23080003      | 0.258599997     | -4.86880016     |
| 16 | 16 | 1.91199994      | 2.10920000      | 1.12329996      |

#### Magnetic moments

|   |             |             |              |
|---|-------------|-------------|--------------|
| 1 | 0.646799982 | 0.284500003 | -0.309899986 |
| 2 | 0.170200005 | 0.178700000 | 0.219699994  |

|    |                 |                 |                 |
|----|-----------------|-----------------|-----------------|
| 3  | -0.497799993    | 0.128600001     | -4.90000006E-03 |
| 4  | 3.55000012E-02  | 0.483599991     | 0.265899986     |
| 5  | 0.361999989     | 0.112000003     | 0.129500002     |
| 6  | 0.422300011     | -0.367000014    | -0.116200000    |
| 7  | 0.389400005     | 0.564599991     | 0.172399998     |
| 8  | 0.225400001     | -0.667699993    | 0.252099991     |
| 9  | 0.297199994     | -0.276199996    | 0.255100012     |
| 10 | -0.263500005    | -0.174199998    | -0.486499995    |
| 11 | -0.157600001    | 0.352499992     | -7.09000006E-02 |
| 12 | -9.39999968E-02 | -7.86999986E-02 | 0.445100009     |
| 13 | -0.326599985    | 0.246900007     | 0.197099999     |
| 14 | -0.502799988    | -0.163399994    | -0.230100006    |
| 15 | -5.04000001E-02 | 0.317000002     | 6.98999986E-02  |
| 16 | -2.71000005E-02 | 0.109099999     | -2.09999997E-02 |

Ground energy

-686.917236

Excitation energies

6.74109983

6.86040020

7.12519979

7.24580002

7.25589991

7.52199984

7.69939995

7.78859997

7.87410021

8.00479984

8.02280045

8.12860012

8.17889977

8.22910023

8.32590008

8.35179996

## S2. Composition of the essential eigenvectors of the covariance matrix

Composition of the first two eigenvectors (number of atoms are reported at the end of this paragraph) of the covariance matrix for:

D-glucose-Alpha

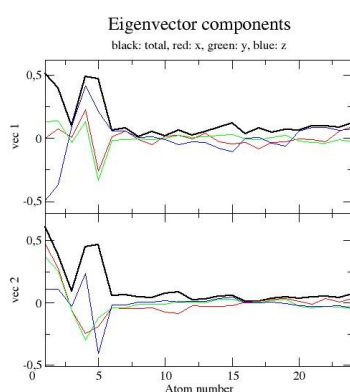

D-glucose-Beta

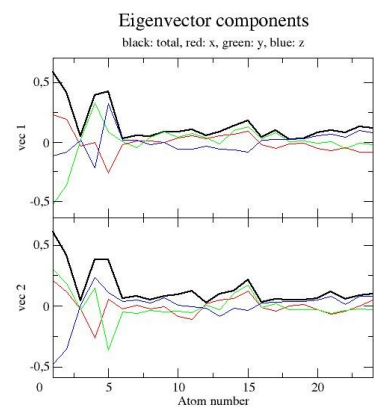

D-galactose-Alpha

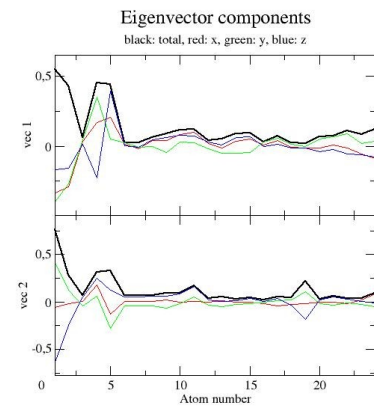

D-galactose-Beta

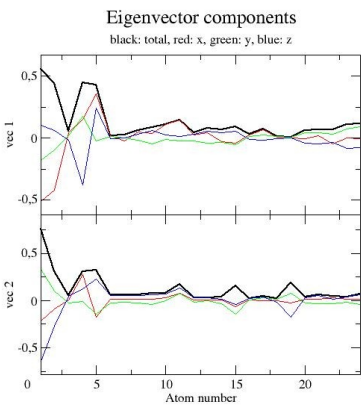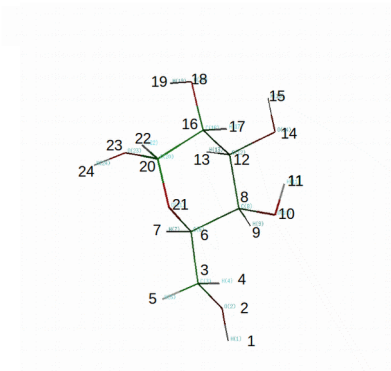

S3. Location of the Representative Conformations on the Essential plane

D-Glucose-Alpha

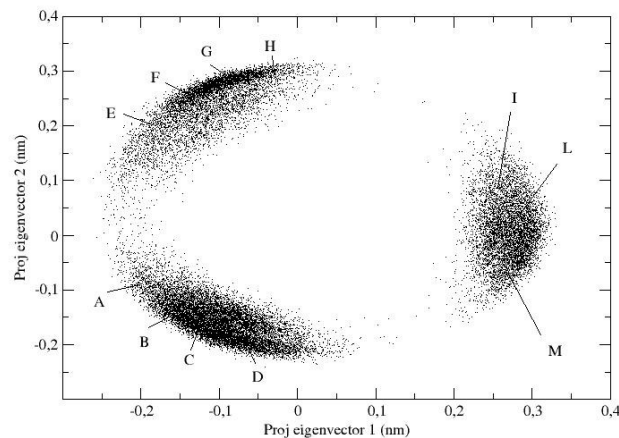

D-Glucose-Beta

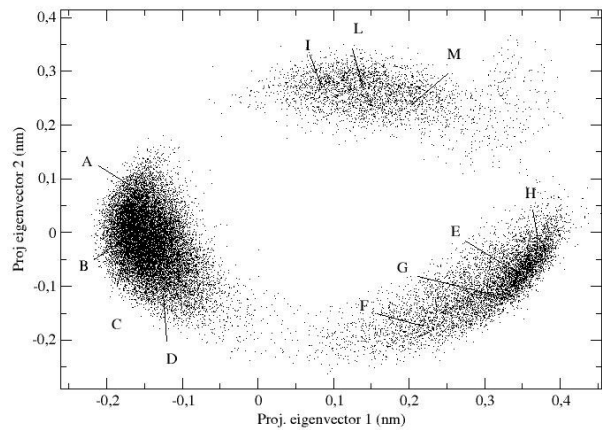

D-Galactose-Alpha

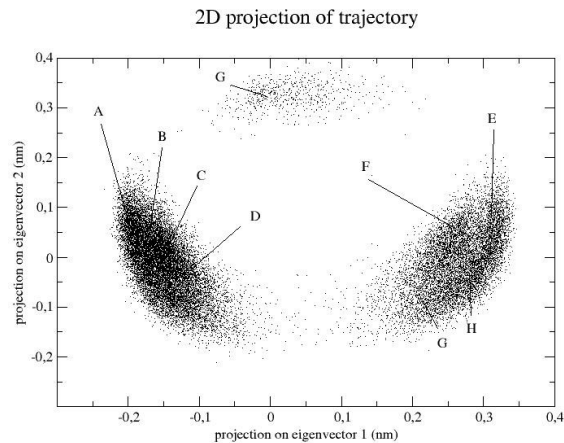



## D-Galactose-Beta

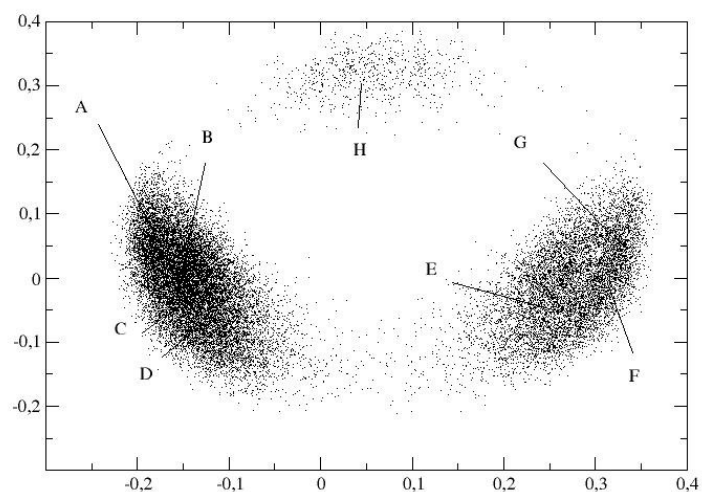

## S4. Spectra of the GG and GT rotamers for Alpha and Beta D-glucose

Spectra of the GG and GT rotamers for Alpha and Beta D-glucose

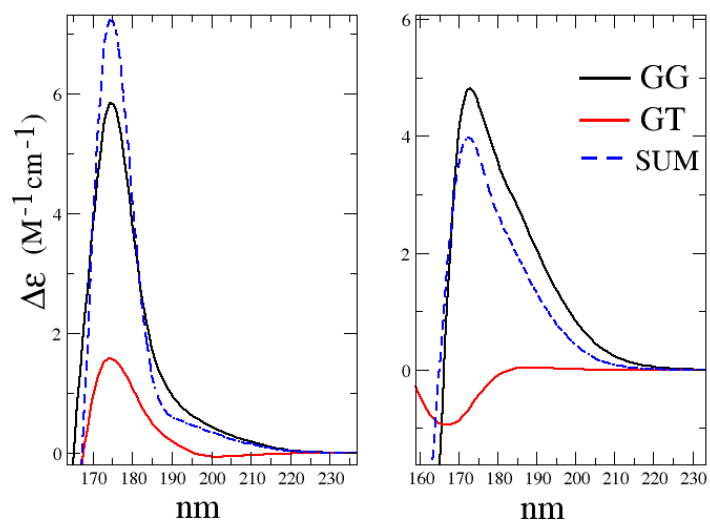

## S5. Eigenvalues of the D-Galactose covariance matrix

Spectra of the eigenvalues from the diagonalization of the covariance matrix for Alpha (black) and Beta (red) D-galactose.

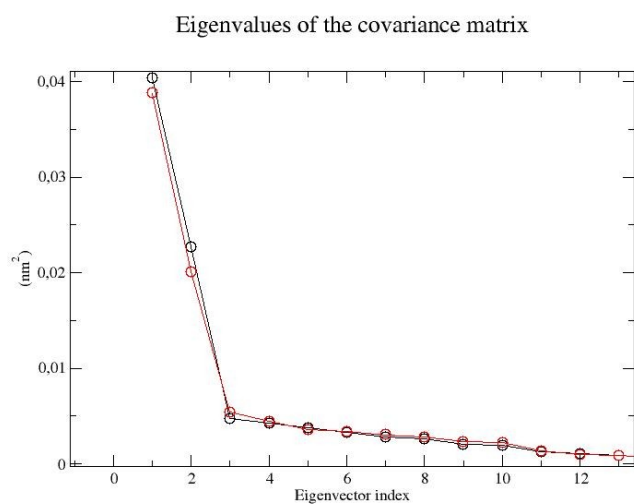

Supplement: s1 [file s1]
